# Supplementary material for: Are we overestimating risk of enteric pathogen spillover from wild birds to humans?
Source: PubMed Central journal article supplement — Biol Rev Camb Philos Soc. 2020 Jan 31;95(3):652–79. doi: 10.1111/brv.12581 (PMC7317827; doi:10.1111/brv.12581), 2020-01-31
Supplement: BRV-95-652-s001.pdf [file BRV-95-652-s001.pdf]

## Supporting Information

### CONTENTS

**Table S1.** List of variables used in Supplementary Data S1.

**Table S2.** List of variables used in Supplementary Data S2.

**Fig. S1.** Map showing locations of studies ( $N = 211$ ) used in meta-analysis.

**Fig. S2.** Map showing number of samples positive/number of samples tested for (A) *Campylobacter* spp., (B) pathogenic *E. coli*, and (C) *Salmonella* spp. by study location.

**Table S3.** List of variables used in Supplementary Data S3.

**Table S4.** Studies reporting data on pathogen prevalence by sex (male, female).

**Table S5.** Studies reporting data on pathogen prevalence by age (juvenile, nestling, adult).

**Table S6.** Summary of studies reporting coinfection data.

**Fig. S3.** Forest plot showing the results of six studies examining the difference in *Salmonella* spp. prevalence in female *versus* male birds.

**Fig. S4.** Forest plot showing the results of 10 estimates from seven studies examining the difference in *Campylobacter* spp. prevalence in juvenile *versus* adult birds from four orders.

**Fig. S5.** Forest plot showing the results of two estimates from two studies examining the difference in pathogenic *E. coli* prevalence in juvenile *versus* adult birds.

**Fig. S6.** Forest plot showing the results of 13 estimates from 12 studies examining the difference in *Salmonella* spp. prevalence in juvenile *versus* adult birds.

**Table S7.** Studies reporting data on pathogen prevalence *versus* condition metrics.

**Table S8.** Bacterial concentration shed in wild bird faeces and duration of shedding for naturally occurring faeces (surveys) and inoculation experiments.

**Table S9.** Seasonal variation in bacterial prevalence and shedding.

**Table S10.** Studies seeking to demonstrate crossover of bacteria between wild birds and humans and/or livestock, including molecular technique used (comparison method), extent of coverage/comparison group, the number of isolates or strains from wild birds that matched human/livestock isolates/strain types, number of birds tested or number of bird isolates, and wild bird species tested.

**Fig S7.** Estimated prevalence of (A) *Campylobacter* spp., (B) pathogenic *E. coli*, and (C) *Salmonella* spp. for all species with enough observations to estimate prevalence with 5% precision.

**Fig. S8.** Estimated prevalence of *Campylobacter* spp., pathogenic *E. coli*, and *Salmonella* spp. by taxonomic order.

**Table S11.** Prevalence of *Campylobacter* spp. by taxonomic order.

**Table S12.** Tukey HSD pairwise comparisons of *Campylobacter* spp. prevalence in avian taxonomic orders.

**Table S13.** Prevalence of pathogenic (path)*E. coli* by taxonomic order. Total number of individuals reported positive and tested for pathogenic *E. coli* across the literature and prevalence (total positive across the literature/total number tested, “Path *E. coli* prevalence”) by taxonomic order.

**Table S14.** Tukey HSD pairwise comparisons of pathogenic *E. coli* prevalence in avian taxonomic orders.

**Table S15.** Prevalence of *Salmonella* spp. by taxonomic order. Total number of individuals reported positive and tested for *Salmonella* spp. across the literature and prevalence (total positive across the literature/total number tested, “*Salmonella* prevalence”) by taxonomic order.

**Table S16.** Tukey HSD pairwise comparisons of *Salmonella* spp. prevalence in avian taxonomic orders.

**Table S17.** Chi-square test for bias in testing within bird orders for *Campylobacter* spp., *E. coli*, and *Salmonella* spp. for a vulnerable farming population.

**Table S18.** Chi-square test for bias in testing within bird orders for *Campylobacter* spp., *E. coli*, and *Salmonella* spp. for a vulnerable farming population.

**Table S19.** Number and percentage of farm bird species and number of combined sightings of species and percentage of total sightings for species with enough data to calculate prevalence for three, two, or one pathogen, those with some data and those with no data.

**Fig. S9.** Scatterplot showing the percentage of pathogen observations belonging to each taxonomic order observed on farms by Smith *et al.* (2019).

**Fig. S10.** Scatterplot showing the percentage of pathogen observations belonging to each taxonomic order *versus* their relative abundances observed on farms by Smith *et al.* (2019).

**Fig. S11.** Scatterplot showing the percentage of pathogen observations belonging to each taxonomic order listed in the North American Breeding Bird Survey species list.

**Table S20.** Chi-square test for bias in testing within bird order for *Campylobacter* spp., *E. coli*, and *Salmonella* spp. in North American breeding birds by percentage of species within each order.

**Table S21.** Chi-square test for bias in testing within bird order for *Campylobacter* spp., *E. coli*, and *Salmonella* spp. in North American breeding birds by relative abundance reported in eBird.

**Table S22.** Number and percentage of North American breeding bird species and number of combined eBird sightings of species and percentage of total sightings with enough data to calculate prevalence for three, two, or one pathogen, those with some data and those with no data.

**Table S23.** Comparison of estimated prevalence by substance tested for house sparrow.

**Table S24.** Comparison of estimated prevalence by substance tested for European starling.

**Table S25.** Comparison of estimated prevalence by substance tested for rock pigeon.

**Fig. S12.** Percentage of total (A) diet guild and (B) foraging strata comprised by each taxonomic order denoted by colour.

**Table S26.** Prevalence of *Campylobacter* spp. by diet guild in wild birds.

**Table S27.** Tukey HSD pairwise comparisons examining *Campylobacter* spp. prevalence by diet guild.

**Table S28.** Prevalence of *Campylobacter* spp. by foraging strata in wild birds.

**Table S29.** Tukey HSD pairwise comparisons examining *Campylobacter* spp. prevalence by foraging strata.

**Table S30.** Prevalence of pathogenic *E. coli* by diet guild in wild birds.

**Table S31.** Tukey HSD pairwise comparisons examining pathogenic *E. coli* prevalence by diet guild.

**Table S32.** Prevalence of pathogenic *E. coli* by foraging strata in wild birds.

**Table S33.** Tukey HSD pairwise comparisons examining pathogenic *E. coli* prevalence by foraging strata.

**Table S34.** Prevalence of *Salmonella* spp. by diet guild in wild birds.

**Table S35.** Tukey HSD pairwise comparisons examining *Salmonella* spp. prevalence by diet guild.

**Table S36.** Prevalence of *Salmonella* spp. by foraging strata in wild birds.

**Table S37.** Tukey HSD pairwise comparisons examining *Salmonella* spp. prevalence by foraging strata.

**Table S1.** List of variables used in Supplementary Data S1.

| Category             | Class                                                                                                              | Number of studies | Definition                                                                                                                                                                                                                                                                                                                                                                                                                                                                                                                                                                                                                                                                                                                                                                                                                                                                                                                                                                                                                                                                                                                                                                                                                                                                                                                                                                                                                                                 |
|----------------------|--------------------------------------------------------------------------------------------------------------------|-------------------|------------------------------------------------------------------------------------------------------------------------------------------------------------------------------------------------------------------------------------------------------------------------------------------------------------------------------------------------------------------------------------------------------------------------------------------------------------------------------------------------------------------------------------------------------------------------------------------------------------------------------------------------------------------------------------------------------------------------------------------------------------------------------------------------------------------------------------------------------------------------------------------------------------------------------------------------------------------------------------------------------------------------------------------------------------------------------------------------------------------------------------------------------------------------------------------------------------------------------------------------------------------------------------------------------------------------------------------------------------------------------------------------------------------------------------------------------------|
| Reference            |                                                                                                                    | 211               | Publication identifier                                                                                                                                                                                                                                                                                                                                                                                                                                                                                                                                                                                                                                                                                                                                                                                                                                                                                                                                                                                                                                                                                                                                                                                                                                                                                                                                                                                                                                     |
| Pathogen(s)          |                                                                                                                    |                   | Pathogens for which the study reported data; must be <i>Campylobacter</i> spp., <i>E. coli</i> , and/or <i>Salmonella</i> spp. Other pathogens not included in meta-analysis                                                                                                                                                                                                                                                                                                                                                                                                                                                                                                                                                                                                                                                                                                                                                                                                                                                                                                                                                                                                                                                                                                                                                                                                                                                                               |
| <i>Campylobacter</i> | 0 – study did not report data on <i>Campylobacter</i> spp.<br>1 – study reported data on <i>Campylobacter</i> spp. | 61                | If study reported data on <i>Campylobacter</i> spp.                                                                                                                                                                                                                                                                                                                                                                                                                                                                                                                                                                                                                                                                                                                                                                                                                                                                                                                                                                                                                                                                                                                                                                                                                                                                                                                                                                                                        |
| <i>E. coli</i>       | 0 – study did not report data on <i>E. coli</i><br>1 – study reported data on <i>E. coli</i>                       | 80                | If study reported data on <i>E. coli</i> ; generic or pathogenic                                                                                                                                                                                                                                                                                                                                                                                                                                                                                                                                                                                                                                                                                                                                                                                                                                                                                                                                                                                                                                                                                                                                                                                                                                                                                                                                                                                           |
| <i>Salmonella</i>    | 0 – study did not report data on <i>Salmonella</i> spp.<br>1 – study reported data on <i>Salmonella</i> spp.       | 134               | If study reported data on <i>Salmonella</i> spp.                                                                                                                                                                                                                                                                                                                                                                                                                                                                                                                                                                                                                                                                                                                                                                                                                                                                                                                                                                                                                                                                                                                                                                                                                                                                                                                                                                                                           |
| REJECTED?            |                                                                                                                    |                   | Indicates if paper did not meet criteria 7–9; any papers not meeting criteria 1–6 for inclusion were excluded from the meta-data in Supplementary Data 1.<br><br>(1) paper reported if one or more of the 431 North American breeding birds was/were tested for <i>Campylobacter</i> spp., <i>Escherichia coli</i> , and/or <i>Salmonella</i> spp.; (2) study presented primary data that were not duplicated from other studies included in the meta-analysis; (3) study identified bird species that provided sample (e.g. <i>Larus</i> spp. was not sufficient but <i>Larus argentatus</i> was); (4) study reported natural infections, i.e. no experimental infection data; (5) paper was in English, Spanish, or French or had all data extractable from English language abstract; and (6) birds had not been in captivity for more than 24 h at the start of the study (no farm, long-term rehabilitation centre, or laboratory animals). Data were further considered unsuitable for generating pathogen prevalence estimates but suitable for reporting presence/absence of bacteria if they: (7) reported only generic <i>E. coli</i> ; (8) did not report number of individuals tested or positive (including only reporting number of isolates); or (9) only reported data on birds collected after death (excluding hunted birds which we assumed to be a random sample of wild bird populations) or were brought to a rehabilitation centre. |

|                  |                                                                    |    |                                                                                                                                                     |
|------------------|--------------------------------------------------------------------|----|-----------------------------------------------------------------------------------------------------------------------------------------------------|
| Source           |                                                                    |    | Where paper was found; <i>Web of Science</i> search or within another publication                                                                   |
| Substance tested |                                                                    |    | Written description of substances tested; N/A, not available                                                                                        |
| Blood            | 0 – substance not tested<br>1 – substance tested                   | 15 | Blood was tested for one or more bacteria included in the meta-analysis                                                                             |
| Body surface     | 0 – substance not tested<br>1 – substance tested                   | 3  | The body surface (feathers, feet, etc.) was tested for one or more bacteria included in the meta-analysis                                           |
| Intestines       | 0 – substance not tested<br>1 – substance tested                   | 38 | Whole intestines or extruded intestinal contents were tested for one or more bacteria included in the meta-analysis                                 |
| Choana           | 0 – substance not tested<br>1 – substance tested                   | 2  | The choana was tested for one or more bacteria included in the meta-analysis                                                                        |
| Cloacal swab     | 0 – substance not tested<br>1 – substance tested                   | 81 | Swab was inserted into cloaca and tested for one or more bacteria included in the meta-analysis                                                     |
| Faeces           | 0 – substance not tested<br>1 – substance tested                   | 83 | Faeces were tested for one or more bacteria included in the meta-analysis; excludes faecal matter recovered by squeezing a dissected intestine      |
| Egg              | 0 – substance not tested<br>1 – substance tested                   | 1  | Egg surfaces or insides were tested for one or more bacteria included in the meta-analysis                                                          |
| Tissues          | 0 – substance not tested<br>1 – substance tested                   | 44 | Tissues (liver, pancreas, spleen, heart, etc.) were tested for one or more bacteria included in the meta-analysis                                   |
| Pharynx          | 0 – substance not tested<br>1 – substance tested                   | 8  | Pharynx, larynx, or other throat area was tested for one or more bacteria included in the meta-analysis                                             |
| Other            | 0 – substance not tested<br>1 – substance tested                   | 5  | Substance other than those listed above (e.g. bile, crop, lymph nodes, and nests) was tested for one or more bacteria included in the meta-analysis |
| N/A              | 0 – substance tested included<br>1 – substance tested not included | 3  | Not enough information to determine what substance was tested                                                                                       |
| Condition        |                                                                    |    | Written description of bird condition upon testing; N/A, not available                                                                              |
| Environmental    | 0 – birds not tested in condition                                  | 35 | Faeces on ground upon collection; to be included in meta-analysis, researchers had to identify defecating species                                   |

|               |                                                                                     |     |                                                                                                                                           |
|---------------|-------------------------------------------------------------------------------------|-----|-------------------------------------------------------------------------------------------------------------------------------------------|
|               | 1 – birds tested in condition                                                       |     |                                                                                                                                           |
| Hunted        | 0 – birds not tested in condition<br>1 – birds tested in condition                  | 32  | Hunters or researchers shot birds which were subsequently tested for bacteria                                                             |
| Live          | 0 – birds not tested in condition<br>1 – birds tested in condition                  | 130 | Live, healthy birds, captured using trapping or mist-netting                                                                              |
| Necropsy      | 0 – birds not tested in condition<br>1 – birds tested in condition                  | 33  | Birds found dead and submitted for necropsy                                                                                               |
| Sick          | 0 – birds not tested in condition<br>1 – birds tested in condition                  | 10  | Bird showing signs of illness upon capture; birds admitted to rehabilitation centre for less than 24 h                                    |
| N/A           | 0 – bird condition tested was listed<br>1 – bird condition tested was not listed    | 4   | Not enough information to determine condition of bird upon testing                                                                        |
| Test method   |                                                                                     |     | Written description of how individual birds were determined as positive or negative for individual bacteria included in meta-analysis     |
| Agglutination | 0 – study did not use method on 1+ bacteria<br>1 – study used method on 1+ bacteria | 40  | Bacterial identification confirmed using agglutination                                                                                    |
| Culture       | 0 – study did not use method on 1+ bacteria<br>1 – study used method on 1+ bacteria | 190 | Bacteria cultured                                                                                                                         |
| PCR           | 0 – study did not use method on 1+ bacteria<br>1 – study used method on 1+ bacteria | 67  | Bacterial identification confirmed using polymerase chain reaction (PCR) or bacterial presence/absence determined using PCR in rare cases |
| PFGE          | 0 – study did not use method on 1+ bacteria<br>1 – study used method on 1+ bacteria | 22  | Pulsed field gel electrophoresis (PGFE) used to compare isolates                                                                          |

|                          |                                                                                                        |     |                                                                                                                                                                                                         |
|--------------------------|--------------------------------------------------------------------------------------------------------|-----|---------------------------------------------------------------------------------------------------------------------------------------------------------------------------------------------------------|
| Biochemical confirmation | 0 – study did not use method on 1+ bacteria<br>1 – study used method on 1+ bacteria                    | 111 | Biochemical confirmation used to determine bacterial identification following culture                                                                                                                   |
| Sequencing               | 0 – study did not use method on 1+ bacteria<br>1 – study used method on 1+ bacteria                    | 11  | Some form of sequencing used to confirm bacterial identification or compare isolates; Multi-locus sequence typing (MLST), High Throughput Multi Locus Sequence Typing (HiMLST), Sanger sequencing, etc. |
| 16S                      | 0 – study did not use method on 1+ bacteria<br>1 – study used method on 1+ bacteria                    | 10  | 16S gene used for bacterial identification                                                                                                                                                              |
| Serotyping               | 0 – study did not use method on 1+ bacteria<br>1 – study used method on 1+ bacteria                    | 64  | Bacterium sent for serotyping to confirm serovar                                                                                                                                                        |
| Necropsy                 | 0 – study did not use method on 1+ bacteria<br>1 – study used method on 1+ bacteria                    | 25  | Morbid birds visually examined and dissected for signs of disease                                                                                                                                       |
| ELISA                    | 0 – study did not use method on 1+ bacteria<br>1 – study used method on 1+ bacteria                    | 7   | Enzyme-linked immunosorbent assay (ELISA) used to test for antibodies to bacteria                                                                                                                       |
| Other                    | 0 – study did not use method on 1+ bacteria<br>1 – study used method on 1+ bacteria                    | 8   | Other method used: Matrix-assisted laser desorption/ionization time-of-flight mass spectrometry (MALDI-TOF MS), Vero cell cytotoxicity assay, random amplified polymorphic DNA                          |
| N/A                      | 0 – study listed method used<br>1 – study did not list method used                                     | 4   | Not enough information to determine how study determined bacterial presence/absence                                                                                                                     |
| Setting                  |                                                                                                        |     | Written description of habitat type in which study was conducted; N/A, not available                                                                                                                    |
| Agriculture              | 0 – study did not test individuals from habitat type<br>1 – study tested individuals from habitat type | 21  | Non-livestock agriculture such as row cropping and orchards                                                                                                                                             |

|              |                                                                                                        |    |                                                                                                                                  |
|--------------|--------------------------------------------------------------------------------------------------------|----|----------------------------------------------------------------------------------------------------------------------------------|
| Captivity    | 0 – study did not test individuals from habitat type<br>1 – study tested individuals from habitat type | 2  | Birds at rehabilitation centre tested upon admission                                                                             |
| Livestock    | 0 – study did not test individuals from habitat type<br>1 – study tested individuals from habitat type | 32 | Livestock farm such as a concentrated animal feeding operation (CAFO) or chicken house                                           |
| Natural      | 0 – study did not test individuals from habitat type<br>1 – study tested individuals from habitat type | 36 | Native habitat such as forest, wetland, grassland, etc.; does not include urban parks or beaches with surrounding native habitat |
| Urban        | 0 – study did not test individuals from habitat type<br>1 – study tested individuals from habitat type | 77 | Urban, suburban, or residential areas; includes urban parks                                                                      |
| Open water   | 0 – study did not test individuals from habitat type<br>1 – study tested individuals from habitat type | 39 | Open or fast-moving water bodies such as large lakes, oceans, estuaries, bays, beaches, and rivers                               |
| Closed water | 0 – study did not test individuals from habitat type<br>1 – study tested individuals from habitat type | 17 | Closed water bodies such as urban ponds and small lakes                                                                          |
| Refuse       | 0 – study did not test individuals from habitat type<br>1 – study tested individuals from habitat type | 14 | Landfill site with human garbage                                                                                                 |
| Sewage       | 0 – study did not test individuals from habitat type<br>1 – study tested individuals from habitat type | 4  | Waste water from humans or livestock                                                                                             |
| Zoo          | 0 – study did not test individuals from habitat type<br>1 – study tested individuals from habitat type | 4  | Wild birds tested within zoo grounds                                                                                             |



|           |                                                                      |                                                                                                                                                                                                                                                                                                                                                                                                                                                                                                                            |                                                                         |
|-----------|----------------------------------------------------------------------|----------------------------------------------------------------------------------------------------------------------------------------------------------------------------------------------------------------------------------------------------------------------------------------------------------------------------------------------------------------------------------------------------------------------------------------------------------------------------------------------------------------------------|-------------------------------------------------------------------------|
| N/A       | 0 – study listed habitat type<br>1 – study did not list habitat type | 64                                                                                                                                                                                                                                                                                                                                                                                                                                                                                                                         | Study did not list habitat in which birds were tested or recovered from |
| Continent |                                                                      | Africa – 2<br>Asia – 12<br>Europe – 78<br>Europe and North America – 1<br>North America – 95<br>South America – 18<br>Zealandia – 5                                                                                                                                                                                                                                                                                                                                                                                        | Continent in which study took place                                     |
| Country   |                                                                      | Algeria – 1<br>Argentina – 1<br>Belgium – 2<br>Brazil – 8<br>Canada – 13<br>Canada, England, United States – 1<br>Chile – 6<br>Costa Rica – 1<br>Croatia – 2<br>Czech Republic – 5<br>Denmark – 3<br>Ecuador – 1<br>Egypt – 1<br>England – 15<br>Germany – 5<br>India – 2<br>Iran – 2<br>Ireland – 2<br>Italy – 8<br>Japan – 7<br>Lithuania – 1<br>Mexico – 2<br>New Zealand – 5<br>Norway – 4<br>Peru – 1<br>Poland – 7<br>Saudi Arabia – 1<br>Scotland – 2<br>Slovenia – 2<br>Spain – 9<br>Sweden – 6<br>The Netherlands | Country in which study took place                                       |

|                    |                                                                                                                 |                                                                                 |                                                                                                                                            |
|--------------------|-----------------------------------------------------------------------------------------------------------------|---------------------------------------------------------------------------------|--------------------------------------------------------------------------------------------------------------------------------------------|
|                    |                                                                                                                 | and Poland – 1<br>Trinidad – 1<br>Turkey – 2<br>United States – 79<br>Wales – 2 |                                                                                                                                            |
| Lat                |                                                                                                                 |                                                                                 | Approximate or exact latitude of study site                                                                                                |
| Long               |                                                                                                                 |                                                                                 | Approximate or exact longitude of study site                                                                                               |
| Exact?             | Yes – coordinates listed are exact study site location<br>No – coordinates estimated due to lack of information | 33<br><br>178                                                                   | If study location is exact or estimated                                                                                                    |
| Notes              |                                                                                                                 |                                                                                 | Any notes on data acquisition or study                                                                                                     |
| Salm_pos           |                                                                                                                 |                                                                                 | Number of individuals from the 431 species examined that tested positive for <i>Salmonella</i> spp. that met criteria for inclusion 1–9    |
| Salm_tested        |                                                                                                                 |                                                                                 | Number of individuals from the 431 species examined that were tested for <i>Salmonella</i> spp. that met criteria for inclusion 1–9        |
| Salm_prev          | Proportion 0–1<br><br>N/A – no individuals tested                                                               |                                                                                 | Overall study prevalence for individuals tested that met criteria for inclusion 1–9; Salm_pos/Salm_tested                                  |
| Path_ecoli_pos     |                                                                                                                 |                                                                                 | Number of individuals from the 431 species examined that tested positive for <i>E. coli</i> that met criteria for inclusion 1–9            |
| Path_ecoli_tested  |                                                                                                                 |                                                                                 | Number of individuals from the 431 species examined that were tested for <i>E. coli</i> that met criteria for inclusion 1–9                |
| Path_ecoli_prev    | Proportion 0–1<br><br>N/A – no individuals tested                                                               |                                                                                 | Overall study prevalence for individuals tested that met criteria for inclusion 1–9; Path_ecoli_pos/Path_ecoli_tested                      |
| Campy_pos          |                                                                                                                 |                                                                                 | Number of individuals from the 431 species examined that tested positive for <i>Campylobacter</i> spp. that met criteria for inclusion 1–9 |
| Campy_tested       |                                                                                                                 |                                                                                 | Number of individuals from the 431 species examined that were tested for <i>Campylobacter</i> spp. that met criteria for inclusion 1–9     |
| Campy_prev         | Proportion 0–1<br><br>N/A – no individuals tested                                                               |                                                                                 | Overall study prevalence for individuals tested that met criteria for inclusion 1–9; Campy_pos/Campy_tested                                |
| Habitat (Exposure) | 0 – study reported                                                                                              | 22                                                                              | Study tested individuals from multiple, listed habitat types and reported estimates by habitat location                                    |

|                              |                                                                                          |    |                                                                                                                                                                                                    |
|------------------------------|------------------------------------------------------------------------------------------|----|----------------------------------------------------------------------------------------------------------------------------------------------------------------------------------------------------|
|                              | estimates in results<br>1 – study did not report estimates in results                    |    |                                                                                                                                                                                                    |
| Landscape (Exposure)         | 0 – study reported estimates in results<br>1 – study did not report estimates in results | 5  | Study explicitly examined effects of landscape context on pathogen presence/absence or prevalence                                                                                                  |
| Diet guild (Exposure)        | 0 – study reported estimates in results<br>1 – study did not report estimates in results | 8  | Study reported estimates of pathogen presence/absence or prevalence summarized by diet guild or gut content                                                                                        |
| Foraging traits (Exposure)   | 0 – study reported estimates in results<br>1 – study did not report estimates in results | 4  | Study reported estimates of pathogen presence/absence or prevalence for multiple foraging traits (not diet guild; foraging strata)                                                                 |
| Movement ability (Exposure)  | 0 – study reported estimates in results<br>1 – study did not report estimates in results | 6  | Study reported pathogen presence/absence or prevalence for species divided into groups with differing movement or dispersal capacity; monitored daily movement capacity                            |
| Migratory pattern (Exposure) | 0 – study reported estimates in results<br>1 – study did not report estimates in results | 5  | Study reported pathogen presence/absence or prevalence for birds divided into migratory strategy groups; migratory, partial migratory, long distance migratory, short distance migratory, resident |
| Taxa (Reservoir competence)  | 0 – study reported estimates in results<br>1 – study did not report estimates in results | 2  | Paper conducts statistical analysis comparing pathogen presence/absence or prevalence by bird taxonomic order or family                                                                            |
| Sex (Reservoir competence)   | 0 – study reported estimates in results<br>1 – study did not report estimates in results | 15 | Study summarized pathogen presence/absence or prevalence by sex; reported positive and negative individuals by sex                                                                                 |

|                                          |                                                                                          |    |                                                                                                                                                                                                                                                    |
|------------------------------------------|------------------------------------------------------------------------------------------|----|----------------------------------------------------------------------------------------------------------------------------------------------------------------------------------------------------------------------------------------------------|
| Age (Reservoir competence)               | 0 – study reported estimates in results<br>1 – study did not report estimates in results | 29 | Study reported pathogen presence/absence or prevalence by individual's age; hatch year, after-hatch year, juvenile, adult, nestling; reported positive and negative individuals by age                                                             |
| Condition (Reservoir competence)         | 0 – study reported estimates in results<br>1 – study did not report estimates in results | 15 | Study reported pathogen presence/absence or prevalence in relation to individual's condition or conducted statistical analyses on a condition gradient including body size, mass, etc.; mentioning general appearance and condition not sufficient |
| Microbiome (Reservoir competence)        | 0 – study reported estimates in results<br>1 – study did not report estimates in results | 0  | Study reported impacts of microbiome diversity or composition on pathogen presence/absence or prevalence                                                                                                                                           |
| Coinfection (Reservoir competence)       | 0 – study reported estimates in results<br>1 – study did not report estimates in results | 23 | Study reported coinfection data for one or more pathogens in one or more wild bird species included in meta-analysis; could include coinfection of meta-analysis pathogen with non-meta-analysis pathogen                                          |
| Immunity (Reservoir competence)          | 0 – study reported estimates in results<br>1 – study did not report estimates in results | 0  | Study estimated impacts of innate or acquired immunity on pathogen presence/absence or prevalence                                                                                                                                                  |
| Infectious dose (Reservoir competence)   | 0 – study reported estimates in results<br>1 – study did not report estimates in results | 0  | Study quantified infectious dose required for shedding or disease in wild birds                                                                                                                                                                    |
| Shedding amount (Reservoir competence)   | 0 – study reported estimates in results<br>1 – study did not report estimates in results | 13 | Study quantified the number of microorganisms included in meta-analysis that were shed in faeces                                                                                                                                                   |
| Shedding duration (Reservoir competence) | 0 – study reported estimates in results                                                  | 5  | Study examined duration of pathogen shedding or reported carrier state at various capture times                                                                                                                                                    |

|                                                      |                                                                                          |     |                                                                                                                                                                                                                               |
|------------------------------------------------------|------------------------------------------------------------------------------------------|-----|-------------------------------------------------------------------------------------------------------------------------------------------------------------------------------------------------------------------------------|
|                                                      | 1 – study did not report estimates in results                                            |     |                                                                                                                                                                                                                               |
| Species/serovar (Reservoir competence)               | 0 – study reported estimates in results<br>1 – study did not report estimates in results | 143 | Study identified bacteria to <i>Campylobacter</i> species or <i>Salmonella</i> serovar; did not stop at genus                                                                                                                 |
| Strain (Reservoir competence)                        | 0 – study reported estimates in results<br>1 – study did not report estimates in results | 80  | Study identified bacterial strain; would include <i>E. coli</i> O157:H7 but not <i>E. coli</i> with <i>stx1</i> ; would include <i>S. Typhimurium</i> ST40 but not <i>S. Typhimurium</i> which would be under species/serovar |
| Ability of strain to colonize (Reservoir competence) | 0 – study reported estimates in results<br>1 – study did not report estimates in results | 1   | Study inoculated wild birds with one or more strains and examined differential ability to colonize or cause disease                                                                                                           |
| Virulence (Reservoir competence)                     | 0 – study reported estimates in results<br>1 – study did not report estimates in results | 8   | Study tested virulence of bacteria to wild birds or livestock through inoculation, mark–recapture, population changes, or other survival metric                                                                               |
| Faecal output (Contact)                              | 0 – study reported estimates in results<br>1 – study did not report estimates in results | 4   | Study quantified faecal output per unit time of wild birds or used published estimates in analyses                                                                                                                            |
| Direct contact (Contact)                             | 0 – study reported estimates in results<br>1 – study did not report estimates in results | 9   | Study quantified direct contact rates of wild birds with livestock, humans, produce, etc. by indexing abundance or contact frequency in sensitive areas                                                                       |
| Indirect contact (Contact)                           | 0 – study reported estimates in results<br>1 – study did not report estimates in results | 6   | Study quantified faecal contamination in water, ability to mechanically vector, or contact of non-avian mechanical vectors with faeces                                                                                        |
| Seasonality (Contact)                                | 0 – study reported                                                                       | 45  | Study examined seasonal variation in pathogen prevalence, shedding intensity, etc.                                                                                                                                            |

|                                                             |                                                                                                |    |                                                                                                                                                                                                                                                                   |
|-------------------------------------------------------------|------------------------------------------------------------------------------------------------|----|-------------------------------------------------------------------------------------------------------------------------------------------------------------------------------------------------------------------------------------------------------------------|
|                                                             | estimates in results<br>1 – study did not report estimates in results                          |    |                                                                                                                                                                                                                                                                   |
| Survival in faeces (Bacterial survival and transmission)    | 0 – study reported estimates in results<br>1 – study did not report estimates in results       | 1  | Study examined survival of pathogen in faeces; inoculated or naturally occurring bacteria                                                                                                                                                                         |
| Other survival (Bacterial survival and transmission)        | 0 – study reported estimates in results<br>1 – study did not report estimates in results       | 0  | Study examined survival of pathogen in water, compost, soil, etc.                                                                                                                                                                                                 |
| Crossover (Bacterial survival and transmission)             | 0 – study reported estimates in results<br>1 – study did not report estimates in results       | 49 | Study attempted to demonstrate crossover of pathogens between wild birds and people, livestock, zoo animals, and/or domestic pets by presenting pathogen data from wild birds and people, livestock, zoo animals, and/or domestic pets (beyond citing literature) |
| Shared strains (Bacterial survival and transmission)        | 0 – study reported estimates in results<br>1 – study did not report estimates in results       | 25 | Study quantifies wild bird bacterial strain similarity to bacterial strains found in humans, livestock, domestic pets, etc. using genetic approach to examine crossover robustly                                                                                  |
| Antibiotic resistance (Bacterial survival and transmission) | 0 – study did not test for antibiotic resistance<br>1 – study tested for antibiotic resistance | 60 | Study tested for antibiotic resistance in one or more bacteria recovered from one or more individual birds in study                                                                                                                                               |
| Outbreak (Bacterial survival and transmission)              | 0 – study reported estimates in results<br>1 – study did not report estimates in results       | 1  | Study robustly isolated wild bird faeces as cause of human foodborne illness outbreak                                                                                                                                                                             |

**Table S2.** List of variables used in Supplementary Data S2.

| Category    | Class                                                                                                                                                                                                                                                                                                                                                                                                                                                                                                                                                                  | Definition                                                                                                                                                                                                                                                                                                                                                                                                                               |
|-------------|------------------------------------------------------------------------------------------------------------------------------------------------------------------------------------------------------------------------------------------------------------------------------------------------------------------------------------------------------------------------------------------------------------------------------------------------------------------------------------------------------------------------------------------------------------------------|------------------------------------------------------------------------------------------------------------------------------------------------------------------------------------------------------------------------------------------------------------------------------------------------------------------------------------------------------------------------------------------------------------------------------------------|
| AOU         |                                                                                                                                                                                                                                                                                                                                                                                                                                                                                                                                                                        | American Ornithologists' Union four-letter code for species ( <a href="https://www.birdpop.org/docs/misc/Alpha_codes_tax.pdf">https://www.birdpop.org/docs/misc/Alpha_codes_tax.pdf</a> )                                                                                                                                                                                                                                                |
| Common_name |                                                                                                                                                                                                                                                                                                                                                                                                                                                                                                                                                                        | Species common name following American Ornithologist's Union                                                                                                                                                                                                                                                                                                                                                                             |
| Scientific  |                                                                                                                                                                                                                                                                                                                                                                                                                                                                                                                                                                        | Scientific name following Birds of North America Online (last searched November 2018)                                                                                                                                                                                                                                                                                                                                                    |
| Order       |                                                                                                                                                                                                                                                                                                                                                                                                                                                                                                                                                                        | Scientific order following Birds of North America Online (last searched November 2018)                                                                                                                                                                                                                                                                                                                                                   |
| Family      |                                                                                                                                                                                                                                                                                                                                                                                                                                                                                                                                                                        | Scientific family following Birds of North America Online (last searched November 2018)                                                                                                                                                                                                                                                                                                                                                  |
| Diet        | <p>Carnivore – reptiles, amphibians, birds, mammals</p> <p>Frugivore – fruits, drupes</p> <p>Granivore – seeds, maize, nuts, grains, spores</p> <p>Herbivore – grass, ground vegetation, weeds, vegetables, fungi, aquatic vegetation, etc.</p> <p>Invertebrate – aquatic invertebrates, ground insects, insect larvae, flying insects, etc.</p> <p>Nectarivore – nectar, pollen, plant exudates, gums</p> <p>Omnivore – ≤ 50% in all four binned categories in Wilman <i>et al.</i> (2014)</p> <p>Piscivore – fish</p> <p>Scavenger – garbage, carcasses, carrion</p> | <p>Classified as guild if diet category represents ≥ 60% of content</p> <p>Diet guild as classified by Wilman <i>et al.</i> (2014), Birds of North America Online, de Graff <i>et al.</i> (1985), and Smith <i>et al.</i> (2019)</p> <p><a href="http://www.esapubs.org/archive/ecol/E095/178/metadata.php">http://www.esapubs.org/archive/ecol/E095/178/metadata.php</a></p> <p><a href="http://birdsna.org">http://birdsna.org</a></p> |
| Forg_strat  | <p>Aerial – foraging in air; doesn't include sallying from perch</p> <p>Canopy – foraging in tree canopy</p> <p>Ground – on ground</p> <p>Midhigh – mid-high levels in trees or bushes (2 m to just below canopy)</p>                                                                                                                                                                                                                                                                                                                                                  | <p>Foraging strata; classified as highest percentage of foraging time in strata estimated in Wilman <i>et al.</i> (2014), Birds of North America Online, and de Graff <i>et al.</i> (1985)</p> <p><a href="http://www.esapubs.org/archive/ecol/E095/178/metadata.php">http://www.esapubs.org/archive/ecol/E095/178/metadata.php</a></p> <p><a href="http://birdsna.org">http://birdsna.org</a></p>                                       |

|                      |                                                                                                                                                                                  |                                                                                                                                                                                                                                                                                                                                                                      |
|----------------------|----------------------------------------------------------------------------------------------------------------------------------------------------------------------------------|----------------------------------------------------------------------------------------------------------------------------------------------------------------------------------------------------------------------------------------------------------------------------------------------------------------------------------------------------------------------|
|                      | Understorey –<br>below 2 m in<br>understorey<br>Wataroundsurf –<br>foraging on or just<br>(<12.5 cm) below<br>water surface<br>Watbelowsurf –<br>foraging below<br>water surface |                                                                                                                                                                                                                                                                                                                                                                      |
| Campy_pos            |                                                                                                                                                                                  | Number of individuals testing positive for any <i>Campylobacter</i> spp. across all studies in meta-analysis that met inclusion criteria 1–9                                                                                                                                                                                                                         |
| Canadensis           |                                                                                                                                                                                  | Number of individuals testing positive for <i>Campylobacter canadensis</i> across all studies in meta-analysis that met inclusion criteria 1–9                                                                                                                                                                                                                       |
| Coli                 |                                                                                                                                                                                  | Number of individuals testing positive for <i>Campylobacter coli</i> across all studies in meta-analysis that met inclusion criteria 1–9                                                                                                                                                                                                                             |
| Jejuni               |                                                                                                                                                                                  | Number of individuals testing positive for <i>Campylobacter jejuni</i> across all studies in meta-analysis that met inclusion criteria 1–9                                                                                                                                                                                                                           |
| Lari                 |                                                                                                                                                                                  | Number of individuals testing positive for <i>Campylobacter lari</i> across all studies in meta-analysis that met inclusion criteria 1–9                                                                                                                                                                                                                             |
| Campy_tested         |                                                                                                                                                                                  | Number of individuals tested for any <i>Campylobacter</i> spp. across all studies in meta-analysis that met inclusion criteria 1–9                                                                                                                                                                                                                                   |
| Campy_prev           | Proportion 0–1<br><br>N/A – no<br>individuals tested                                                                                                                             | Campy_pos/Campy_tested; <i>Campylobacter</i> spp. prevalence across all studies in meta-analysis that met inclusion criteria 1–9                                                                                                                                                                                                                                     |
| Campy_prev_rma.mv    | Proportion 0–1<br><br>N/A – not<br>calculated                                                                                                                                    | Estimated <i>Campylobacter</i> spp. prevalence using random effects models in the rma.mv function in the metafor package in R (Viechtbauer, 2010; R Core Team, 2018) including study as a random effect. Only calculated when data came from two or more studies and we estimated that sufficient observations were available based on the Thrusfield (2007) formula |
| Campy_prev_se_rma.mv | Proportion 0–1<br><br>N/A – not<br>calculated                                                                                                                                    | Standard error of estimated <i>Campylobacter</i> spp. prevalence using random effects models in the rma.mv function in the metafor package in R                                                                                                                                                                                                                      |
| Campy_studies        |                                                                                                                                                                                  | Number of studies that tested for any <i>Campylobacter</i> spp. across all studies in meta-analysis that met inclusion criteria 1–9                                                                                                                                                                                                                                  |
| Campy_total_pos      |                                                                                                                                                                                  | Number of individuals testing positive for any <i>Campylobacter</i> spp. across all studies in meta-analysis that met inclusion criteria 1–6                                                                                                                                                                                                                         |
| Campy_total_tested   |                                                                                                                                                                                  | Number of individuals tested for any <i>Campylobacter</i> spp. across all studies in meta-analysis that met inclusion criteria 1–6                                                                                                                                                                                                                                   |
| Campy_yes            | Yes – one or more<br>individuals of bird<br>species tested<br>positive for<br><i>Campylobacter</i> spp.<br>No – no<br><i>Campylobacter</i> spp.<br>found in bird<br>species      | If one or more individuals tested positive for <i>Campylobacter</i> spp. across all studies in meta-analysis that met inclusion criteria 1–9                                                                                                                                                                                                                         |



|                           |                                                                                                                                                                                                                                                                                                                         |                                                                                                                                                                                                                                                                                                                                                                      |
|---------------------------|-------------------------------------------------------------------------------------------------------------------------------------------------------------------------------------------------------------------------------------------------------------------------------------------------------------------------|----------------------------------------------------------------------------------------------------------------------------------------------------------------------------------------------------------------------------------------------------------------------------------------------------------------------------------------------------------------------|
| Campy_resistant           | Yes – one or more individuals of bird species had <i>Campylobacter</i> spp. that was antibiotic resistant<br>No – no <i>Campylobacter</i> spp. with antibiotic resistance found in bird species tested for antibiotic resistance<br>N/A – no <i>Campylobacter</i> spp. tested for antibiotic resistance in bird species | If antibiotic resistance was found in <i>Campylobacter</i> spp. from bird species                                                                                                                                                                                                                                                                                    |
| Path_ecoli_pos            |                                                                                                                                                                                                                                                                                                                         | Number of individuals testing positive for pathogenic <i>E. coli</i> across all studies in meta-analysis that met inclusion criteria 1–9                                                                                                                                                                                                                             |
| Generic_ecoli_pos         |                                                                                                                                                                                                                                                                                                                         | Number of individuals testing positive for generic <i>E. coli</i> across all studies in meta-analysis that met inclusion criteria 1–6 and 8–9                                                                                                                                                                                                                        |
| Path_ecoli_tested         |                                                                                                                                                                                                                                                                                                                         | Number of individuals tested for pathogenic <i>E. coli</i> across all studies in meta-analysis that met inclusion criteria 1–9                                                                                                                                                                                                                                       |
| Generic_ecoli_tested      |                                                                                                                                                                                                                                                                                                                         | Number of individuals tested for generic <i>E. coli</i> across all studies in meta-analysis that met inclusion criteria 1–6 and 8–9                                                                                                                                                                                                                                  |
| Path_ecoli_prev           | Proportion 0–1<br><br>N/A – no individuals tested                                                                                                                                                                                                                                                                       | Path_ecoli_pos/Path_ecoli_tested; pathogenic <i>E.coli</i> prevalence across all studies in meta-analysis that met inclusion criteria 1–9                                                                                                                                                                                                                            |
| Path_ecoli_prev_rma_mv    | Proportion 0–1<br><br>N/A – not calculated                                                                                                                                                                                                                                                                              | Estimated <i>Campylobacter</i> spp. prevalence using random effects models in the rma.mv function in the metafor package in R (Viechtbauer, 2010; R Core Team, 2018) including study as a random effect. Only calculated when data came from two or more studies and we estimated that sufficient observations were available based on the Thrusfield (2007) formula |
| Path_ecoli_prev_se_rma_mv | Proportion 0–1<br><br>N/A – not calculated                                                                                                                                                                                                                                                                              | Standard error of estimated <i>Campylobacter</i> spp. prevalence using random effects models in the rma.mv function in the metafor package in R                                                                                                                                                                                                                      |
| Generic_ecoli_prev        | Proportion 0–1<br><br>N/A – no individuals tested                                                                                                                                                                                                                                                                       | Generic_ecoli_pos/Generic_ecoli_tested; pathogenic <i>E.coli</i> prevalence across all studies in meta-analysis that met inclusion criteria 1–6 and 8–9                                                                                                                                                                                                              |
| Path_ecoli_studies        |                                                                                                                                                                                                                                                                                                                         | Number of studies that tested for pathogenic <i>E. coli</i> across all studies in meta-analysis that met inclusion criteria 1–9                                                                                                                                                                                                                                      |
| Generic_ecoli_studies     |                                                                                                                                                                                                                                                                                                                         | Number of studies that tested for generic <i>E. coli</i> across all studies in meta-analysis that met inclusion criteria 1–6 and 8–9                                                                                                                                                                                                                                 |
| Path_ecoli_tot_pos        |                                                                                                                                                                                                                                                                                                                         | Number of individuals testing positive for pathogenic <i>E. coli</i> across all studies in meta-analysis that met inclusion criteria 1–9                                                                                                                                                                                                                             |
| Path_ecoli_tot_tested     |                                                                                                                                                                                                                                                                                                                         | Number of individuals tested for pathogenic <i>E. coli</i> across all studies in meta-analysis that met inclusion criteria 1–9                                                                                                                                                                                                                                       |

|                         |                                                                                                                                                                                                                                                                                        |                                                                                                                                                                                                                                                                                                                                                                   |
|-------------------------|----------------------------------------------------------------------------------------------------------------------------------------------------------------------------------------------------------------------------------------------------------------------------------------|-------------------------------------------------------------------------------------------------------------------------------------------------------------------------------------------------------------------------------------------------------------------------------------------------------------------------------------------------------------------|
| Path_ecoli_yes          | Yes – one or more individuals of bird species tested positive for pathogenic <i>E. coli</i> spp.<br>No – no pathogenic <i>E. coli</i> found in bird species                                                                                                                            | If one or more individual tested positive for pathogenic <i>E. coli</i> across all studies in meta-analysis that met inclusion criteria 1–6 and 8–9                                                                                                                                                                                                               |
| Generic_ecoli_resistant | Yes – one or more individuals of bird species had <i>E. coli</i> that was antibiotic resistant<br>No – no <i>E. coli</i> with antibiotic resistance found in bird species tested for antibiotic resistance<br>N/A – no <i>E. coli</i> tested for antibiotic resistance in bird species | If antibiotic resistance was found in <i>E. coli</i> from bird species                                                                                                                                                                                                                                                                                            |
| Ecoli_test_any          |                                                                                                                                                                                                                                                                                        | Number of individuals tested for <i>E. coli</i> across all studies in meta-analysis                                                                                                                                                                                                                                                                               |
| Salm_pos                |                                                                                                                                                                                                                                                                                        | Number of individuals testing positive for any <i>Salmonella</i> spp. across all studies in meta-analysis that met inclusion criteria 1–9                                                                                                                                                                                                                         |
| Salm_tested             |                                                                                                                                                                                                                                                                                        | Number of individuals tested for any <i>Salmonella</i> spp. across all studies in meta-analysis that met inclusion criteria 1–9                                                                                                                                                                                                                                   |
| Salm_prev               | Proportion 0–1<br><br>N/A – no individuals tested                                                                                                                                                                                                                                      | Salm_pos/Salm_tested; <i>Salmonella</i> spp. prevalence across all studies in meta-analysis that met inclusion criteria 1–9                                                                                                                                                                                                                                       |
| Salm_prev_rma.mv        | Proportion 0–1<br><br>N/A – not calculated                                                                                                                                                                                                                                             | Estimated <i>Salmonella</i> spp. prevalence using random effects models in the rma.mv function in the metafor package in R (Viechtbauer, 2010; R Core Team, 2018) including study as a random effect. Only calculated when data came from two or more studies and we estimated that sufficient observations were available based on the Thrusfield (2007) formula |
| Salm_prev_se_rma.mv     | Proportion 0–1<br><br>N/A – not calculated                                                                                                                                                                                                                                             | Standard error of estimated <i>Salmonella</i> spp. prevalence using random effects models in the rma.mv function in the metafor package in Program R                                                                                                                                                                                                              |
| Salm_studies            |                                                                                                                                                                                                                                                                                        | Number of studies that tested for any <i>Salmonella</i> spp. across all studies in meta-analysis that met inclusion criteria 1–9                                                                                                                                                                                                                                  |
| Salm_total_pos          |                                                                                                                                                                                                                                                                                        | Number of individuals testing positive for any <i>Salmonella</i> spp. across all studies in meta-analysis that met inclusion criteria 1–6                                                                                                                                                                                                                         |
| Salm_total_tested       |                                                                                                                                                                                                                                                                                        | Number of individuals tested for any <i>Salmonella</i> spp. across all studies in meta-analysis that met inclusion criteria 1–6                                                                                                                                                                                                                                   |
| Salm_yes                | Yes – one or more individuals of bird species tested positive for <i>Salmonella</i> spp.                                                                                                                                                                                               | If one or more individuals tested positive for <i>Salmonella</i> spp. across all studies in meta-analysis that met inclusion criteria 1–9                                                                                                                                                                                                                         |

|                |                                                                                                                                                                                                                                                                                                                               |                                                                                                                                                          |
|----------------|-------------------------------------------------------------------------------------------------------------------------------------------------------------------------------------------------------------------------------------------------------------------------------------------------------------------------------|----------------------------------------------------------------------------------------------------------------------------------------------------------|
|                | No – no <i>Salmonella</i> spp. found in bird species                                                                                                                                                                                                                                                                          |                                                                                                                                                          |
| Salm_resistant | <p>Yes – one or more individuals of bird species had <i>Salmonella</i> spp. that was antibiotic resistant</p> <p>No – no <i>Salmonella</i> spp. with antibiotic resistance found in bird species tested for antibiotic resistance</p> <p>N/A – no <i>Salmonella</i> spp. tested for antibiotic resistance in bird species</p> | If antibiotic resistance was found in <i>Salmonella</i> spp. from bird species                                                                           |
| Abony to 11:d- |                                                                                                                                                                                                                                                                                                                               | Number of individuals testing positive for <i>Salmonella</i> serovar named in column across all studies in meta-analysis that met inclusion criteria 1–9 |

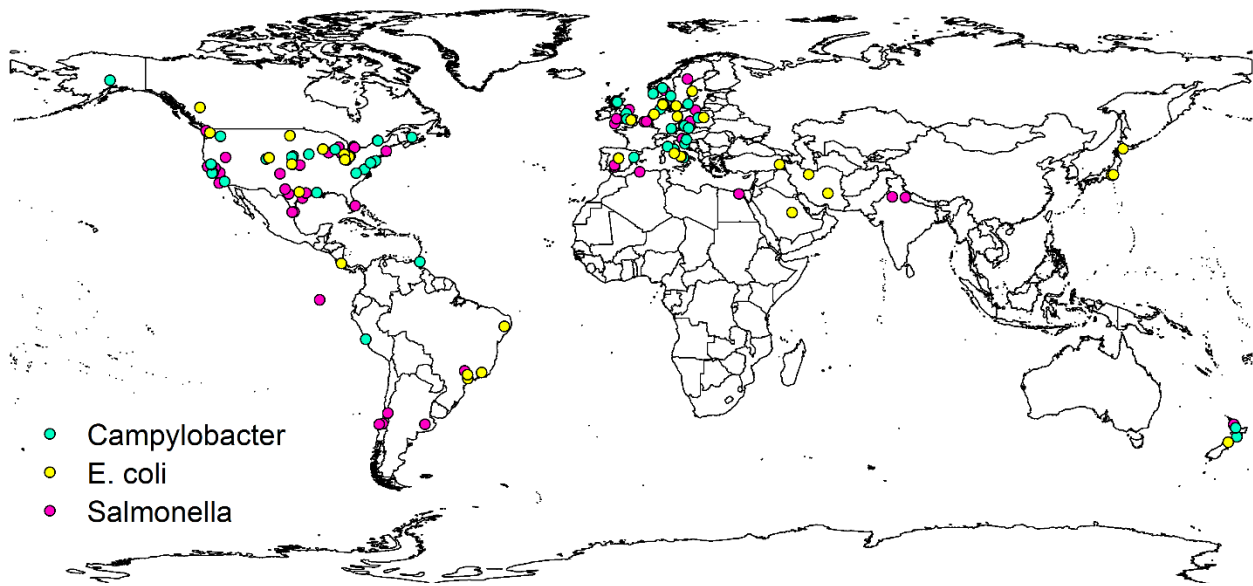

**Fig. S1.** Map showing locations of studies ( $N = 211$ ) used in meta-analysis.

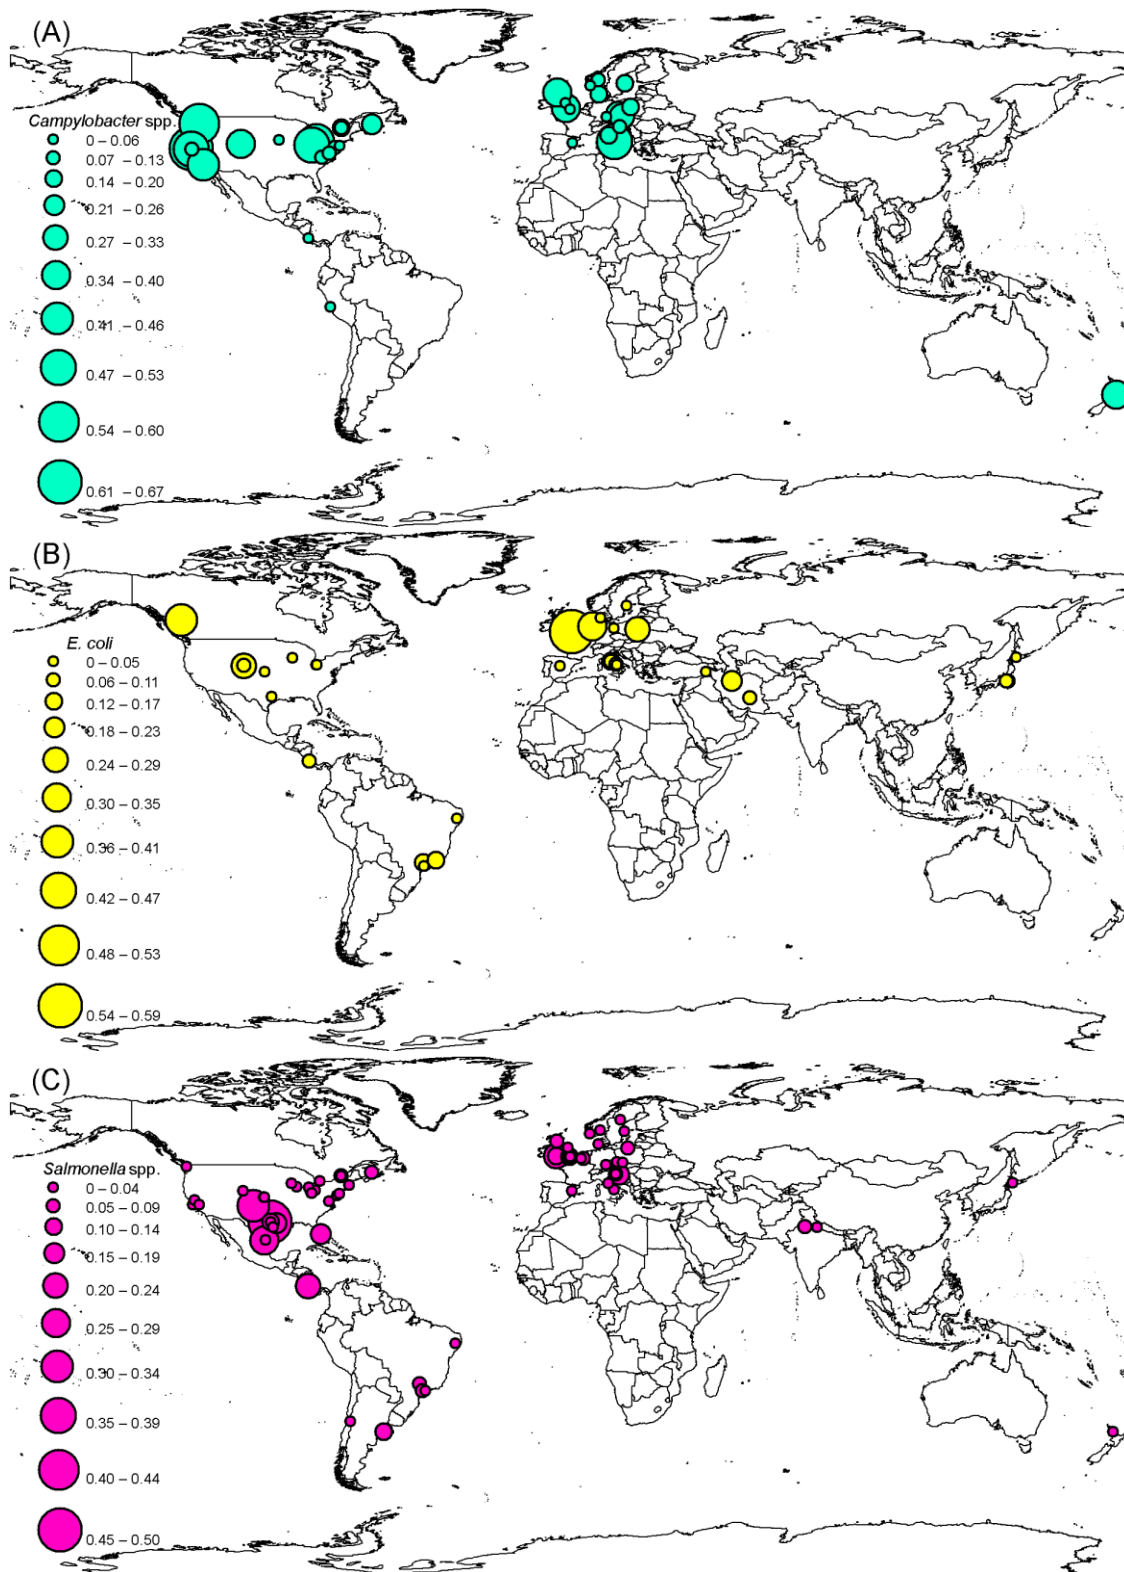

**Fig. S2.** Map showing number of samples positive/number of samples tested for (A) *Campylobacter* spp., (B) pathogenic *E. coli*, and (C) *Salmonella* spp. by study location.

**Table S3.** List of variables used in Supplementary Data S3. One tab is included for data on each of *Campylobacter* spp., pathogenic *E. coli*, generic *E. coli*, and *Salmonella* spp. (4 tabs in total).

| Category   | Class                                                                                                                                                                                                                                                                                                                                                                                                                                                                                                                                 | Definition                                                                                                                                                                                                                                                                                                                                                                                                                              |
|------------|---------------------------------------------------------------------------------------------------------------------------------------------------------------------------------------------------------------------------------------------------------------------------------------------------------------------------------------------------------------------------------------------------------------------------------------------------------------------------------------------------------------------------------------|-----------------------------------------------------------------------------------------------------------------------------------------------------------------------------------------------------------------------------------------------------------------------------------------------------------------------------------------------------------------------------------------------------------------------------------------|
| Study      |                                                                                                                                                                                                                                                                                                                                                                                                                                                                                                                                       | Publication identifier                                                                                                                                                                                                                                                                                                                                                                                                                  |
| Species    |                                                                                                                                                                                                                                                                                                                                                                                                                                                                                                                                       | American Ornithologists' Union four-letter code for species<br><a href="https://www.birdpop.org/docs/misc/Alpha_codes_tax.pdf">https://www.birdpop.org/docs/misc/Alpha_codes_tax.pdf</a>                                                                                                                                                                                                                                                |
| Positive   |                                                                                                                                                                                                                                                                                                                                                                                                                                                                                                                                       | Number of individual samples that tested positive for bacteria for that species in that study                                                                                                                                                                                                                                                                                                                                           |
| Negative   |                                                                                                                                                                                                                                                                                                                                                                                                                                                                                                                                       | Number of individual samples that tested negative for bacteria for that species in that study                                                                                                                                                                                                                                                                                                                                           |
| Tested     |                                                                                                                                                                                                                                                                                                                                                                                                                                                                                                                                       | Total number of individual samples tested for bacteria for that species in that study                                                                                                                                                                                                                                                                                                                                                   |
| Order      |                                                                                                                                                                                                                                                                                                                                                                                                                                                                                                                                       | Scientific order following Birds of North America Online (last searched November 2018)                                                                                                                                                                                                                                                                                                                                                  |
| Family     |                                                                                                                                                                                                                                                                                                                                                                                                                                                                                                                                       | Scientific family following Birds of North America Online (last searched November 2018)                                                                                                                                                                                                                                                                                                                                                 |
| Diet       | Carnivore – reptiles, amphibians, birds, mammals<br>Frugivore – fruits, drupes<br>Granivore – seeds, maize, nuts, grains, spores<br>Herbivore – grass, ground vegetation, weeds, vegetables, fungi, aquatic vegetation, etc.<br>Invertebrate – aquatic invertebrates, ground insects, insect larvae, flying insects, etc.<br>Nectarivore – nectar, pollen, plant exudates, gums<br>Omnivore - $\leq 50\%$ in all four binned categories in Wilman <i>et al.</i> (2014)<br>Piscivore – fish<br>Scavenger – garbage, carcasses, carrion | Classified as guild if diet category represents $\geq 60\%$ of content<br><br>Diet guild as classified by Wilman <i>et al.</i> (2014), Birds of North America Online, de Graff <i>et al.</i> (1985), and Smith <i>et al.</i> (2019)<br><br><a href="http://www.esapubs.org/archive/ecol/E095/178/metadata.php">http://www.esapubs.org/archive/ecol/E095/178/metadata.php</a><br><br><a href="http://birdsna.org">http://birdsna.org</a> |
| Forg_strat | Aerial – foraging in air; doesn't include sallying from perch<br>Canopy – foraging in tree canopy                                                                                                                                                                                                                                                                                                                                                                                                                                     | Foraging strata; classified as highest percentage of foraging time in strata estimated in Wilman <i>et al.</i> (2014), Birds of North America Online, and de Graff <i>et al.</i> (1985)<br><br><a href="http://www.esapubs.org/archive/ecol/E095/178/metadata.php">http://www.esapubs.org/archive/ecol/E095/178/metadata.php</a>                                                                                                        |

|  |                                                                                                                                                                                                                                                              |                                                     |
|--|--------------------------------------------------------------------------------------------------------------------------------------------------------------------------------------------------------------------------------------------------------------|-----------------------------------------------------|
|  | Ground – on ground<br>Midhigh – mid-high levels in trees or bushes (2 m to just below canopy)<br>Understorey – below 2 m in understorey<br>Wataroundsurf – foraging on or just (<12.7 cm) below water surface<br>Watbelowsurf – foraging below water surface | <a href="http://birdsna.org">http://birdsna.org</a> |
|--|--------------------------------------------------------------------------------------------------------------------------------------------------------------------------------------------------------------------------------------------------------------|-----------------------------------------------------|

**Table S4.** Studies reporting data on pathogen prevalence by sex (male, female). Studies that tested for significant differences between the sexes are highlighted in bold. N/A, not available.

| Study                            | Bacteria                   | Female positive | Female tested | Female prevalence | Male positive | M tested | M prevalence | Higher? | Significant? | Species                                | Notes                                                                |
|----------------------------------|----------------------------|-----------------|---------------|-------------------|---------------|----------|--------------|---------|--------------|----------------------------------------|----------------------------------------------------------------------|
| Colles <i>et al.</i> (2009)      | <i>C. jejuni</i>           | N/A             | N/A           | N/A               | N/A           | N/A      | N/A          | Same    | No           | EUST                                   |                                                                      |
| Hald <i>et al.</i> (2016)        | <i>Campylobacter</i> spp.  | N/A             | N/A           | N/A               | N/A           | N/A      | N/A          | Same    | No           | ROPI, HOSP, ETSP, EUST, European birds |                                                                      |
| Sulzner <i>et al.</i> (2014)     | <i>Campylobacter</i> spp.  | N/A             | N/A           | N/A               | N/A           | N/A      | N/A          | Same    | No           | TUVU                                   | Author doesn't report numbers tested but reports statistical results |
| Brittingham <i>et al.</i> (1988) | Generic <i>E. coli</i>     | N/A             | 63            | N/A               | N/A           | 83       | N/A          | Same    | No           | BCCH                                   | Does not clarify which sex was positive                              |
| Gaulker <i>et al.</i> (2009)     | Generic <i>E. coli</i>     | N/A             | N/A           | N/A               | N/A           | N/A      | N/A          | Same    | No           | EUST                                   |                                                                      |
| Sulzner <i>et al.</i> (2014)     | Generic <i>E. coli</i>     | N/A             | N/A           | N/A               | N/A           | N/A      | N/A          | Same    | No           | TUVU                                   | Author doesn't report numbers tested but reports statistical results |
| Gibbs <i>et al.</i> (2007)       | Pathogenic <i>E. coli</i>  | 1               | 7             | 14.3%             | 1             | 14       | 7.1%         | Female  | Not tested   | YHBL                                   |                                                                      |
| Monaghan <i>et al.</i> (1985)    | <i>Salmonella</i> spp.     | 45              | 316           | 14.2%             | 42            | 385      | 10.9%        | Female  | Yes          | HERG                                   | Only higher in non-breeding season                                   |
| Sinai <i>et al.</i> (2017)       | <i>Salmonella</i> spp.     | 0               | 1             | 0.0%              | 0             | 30       | 0.0%         | Same    | Not tested   | GRSG                                   |                                                                      |
| Sulzner <i>et al.</i> (2014)     | <i>Salmonella enterica</i> | N/A             | N/A           | N/A               | N/A           | N/A      | N/A          | Same    | No           | TUVU                                   | Author doesn't report numbers                                        |



|                                         |                                       |     |     |        |     |     |        |               |                               |                                  |                                                                                                                             |
|-----------------------------------------|---------------------------------------|-----|-----|--------|-----|-----|--------|---------------|-------------------------------|----------------------------------|-----------------------------------------------------------------------------------------------------------------------------|
|                                         |                                       |     |     |        |     |     |        |               |                               |                                  | tested but reports statistical results                                                                                      |
| Espinosa-Arguelles <i>et al.</i> (2010) | <i>Salmonella</i> Gallinarum-Pullorum | 27  | 78  | 34.6%  | 26  | 123 | 21.1%  | <b>Female</b> | <b>Marginally significant</b> | MODO, WWDO                       |                                                                                                                             |
| Brittingham <i>et al.</i> (1988)        | <i>Salmonella</i> spp.                | 0   | 63  | 0.0%   | 0   | 83  | 0.0%   | <b>Same</b>   | <b>No</b>                     | BCCH                             |                                                                                                                             |
| Gonzalez-Acuna <i>et al.</i> (2007)     | <i>Salmonella</i> spp.                | 0   | 47  | 0.0%   | 4   | 49  | 8.2%   | <b>Male</b>   | <b>No</b>                     | ROPI                             |                                                                                                                             |
| Grigar <i>et al.</i> (2017)             | <i>Salmonella</i> spp.                | 2   | 132 | 1.5%   | 0   | 243 | 0.0%   | Female        | Not tested                    | BWTE, REDH                       |                                                                                                                             |
| Hughes <i>et al.</i> (2008)             | <i>Salmonella</i> spp.                | 19  | 19  | 100.0% | 10  | 10  | 100.0% | Same          | Not tested                    | HOSP, EUST, EUCD, European birds | Necropsies                                                                                                                  |
| Lawson <i>et al.</i> (2010)             | <i>Salmonella</i> spp.                | 12  | 12  | 100.0% | 12  | 12  | 100.0% | <b>Same</b>   | <b>No</b>                     | HOSP                             | Necropsies                                                                                                                  |
| Toro <i>et al.</i> (1999)               | <i>Salmonella</i> spp.                | N/A | 53  | N/A    | N/A | 47  | N/A    | Same          | Not tested                    | ROPI                             | “The results...are presented as a group because there were no important differences among them depending on...sex” (p. 620) |
| Daoust <i>et al.</i> (2000)             | <i>Salmonella</i> Typhimurium         | 12  | 12  | 100.0% | 19  | 19  | 100.0% | Same          | Not tested                    | PISI, PUFI, EVGR, AMGO, CORE     | Necropsies                                                                                                                  |

**Table S5.** Studies reporting data on pathogen prevalence by age (juvenile, nestling, adult). Studies that tested for significant differences between age groups are highlighted in bold. N/A, not available.

| Study                               | Bacteria                    | Juvenile positive | Juvenile tested | Juvenile prevalence | Adult positive | Adult tested | Adult prevalence | Higher          | Significant                   | Species                   | Notes                                     |
|-------------------------------------|-----------------------------|-------------------|-----------------|---------------------|----------------|--------------|------------------|-----------------|-------------------------------|---------------------------|-------------------------------------------|
| Keller & Shriver (2014)             | <i>Campylobacter jejuni</i> | 8                 | 92              | 8.7%                | 8              | 35           | 22.9%            | Adult           | Not tested                    | Larus spp.                |                                           |
| Lillehaug <i>et al.</i> (2005)      | <i>Campylobacter jejuni</i> | 3                 | 102             | 2.9%                | 4              | 103          | 3.9%             | Adult           | Not tested                    | ROPI, MALL                |                                           |
| Colles <i>et al.</i> (2009)         | <i>Campylobacter jejuni</i> | N/A               | N/A             | N/A                 | N/A            | N/A          | N/A              | <b>Juvenile</b> | <b>Yes</b>                    | EUST                      |                                           |
| Gabriele-Rivet <i>et al.</i> (2015) | <i>Campylobacter jejuni</i> | 1                 | 6               | 16.7%               | 14             | 167          | 8.4%             | <b>Juvenile</b> | <b>No</b>                     | ROPI                      |                                           |
| Keller & Shriver (2014)             | <i>Campylobacter jejuni</i> | 6                 | 36              | 16.7%               | 2              | 206          | 1.0%             | Juvenile        | Not tested                    | CANG                      |                                           |
| Taff <i>et al.</i> (2016)           | <i>Campylobacter jejuni</i> | 73                | 102             | 71.6%               | 106            | 235          | 45.1%            | <b>Nestling</b> | <b>Yes</b>                    | AMCR                      | Nestlings                                 |
| Waldenstrom <i>et al.</i> (2002)    | <i>Campylobacter</i> spp.   | 11                | 20              | 55.0%               | 276            | 364          | 75.8%            | <b>Adult</b>    | <b>Yes</b>                    | European shorebirds       |                                           |
| Lombardo <i>et al.</i> (1996)       | <i>Campylobacter</i> spp.   | 5                 | 13              | 38.5%               | 8              | 8            | 100.0%           | <b>Adult</b>    | <b>Yes</b>                    | TRES                      |                                           |
| Weis <i>et al.</i> (2014)           | <i>Campylobacter</i> spp.   | 59                | 91              | 64.8%               | 27             | 40           | 67.5%            | Adult           | Not tested                    | AMCR                      | Nestlings <i>versus</i> adults/subadults  |
| Waldenstrom <i>et al.</i> (2002)    | <i>Campylobacter</i> spp.   | 50                | 676             | 7.4%                | 7              | 115          | 6.1%             | <b>Juvenile</b> | <b>No</b>                     | European Passerines, EUST |                                           |
| Levesque <i>et al.</i> (2000)       | <i>Campylobacter</i> spp.   | N/A               | N/A             | N/A                 | N/A            | N/A          | N/A              | <b>Juvenile</b> | <b>Marginally significant</b> | RBGU                      | Testing bacterial concentration in colony |

|                                         |                                       |     |     |       |     |     |       |                 |                               |                                        |                                                                      |
|-----------------------------------------|---------------------------------------|-----|-----|-------|-----|-----|-------|-----------------|-------------------------------|----------------------------------------|----------------------------------------------------------------------|
|                                         |                                       |     |     |       |     |     |       |                 |                               |                                        | forming units (CFU)/g rather than prevalence                         |
| Sulzner <i>et al.</i> (2014)            | <i>Campylobacter</i> spp.             | N/A | N/A | N/A   | N/A | N/A | N/A   | <b>Same</b>     | <b>No</b>                     | TUVU                                   | Author doesn't report numbers tested but reports statistical results |
| Hald <i>et al.</i> (2016)               | <i>Campylobacter</i> spp.             | N/A | N/A | N/A   | N/A | N/A | N/A   | <b>Same</b>     | <b>No</b>                     | ROPI, HOSP, ETSP, EUST, European birds |                                                                      |
| Gibbs <i>et al.</i> (2007)              | <i>E. coli</i>                        | 1   | 15  | 6.7%  | 1   | 6   | 16.7% | <b>Adult</b>    | <b>Not tested</b>             | YHBL                                   |                                                                      |
| Morabito <i>et al.</i> (2001)           | <i>E. coli</i> (STEC)                 | 30  | 156 | 19.2% | 40  | 487 | 8.2%  | <b>Juvenile</b> | <b>Yes</b>                    | ROPI                                   |                                                                      |
| Sulzner <i>et al.</i> (2014)            | Generic <i>E. coli</i>                | N/A | N/A | N/A   | N/A | N/A | N/A   | <b>Same</b>     | <b>No</b>                     | TUVU                                   | Author doesn't report numbers tested but reports statistical results |
| Gaulker <i>et al.</i> (2009)            | Generic <i>E. coli</i>                | N/A | N/A | N/A   | N/A | N/A | N/A   | <b>Same</b>     | <b>No</b>                     | EUST                                   |                                                                      |
| Espinosa-Arguelles <i>et al.</i> (2010) | <i>Salmonella</i> Gallinarum-Pullorum | 8   | 26  | 30.8% | 45  | 175 | 25.7% | <b>Juvenile</b> | <b>Marginally significant</b> | MODO, WWDO                             |                                                                      |
| Gonzalez-Acuna <i>et al.</i> (2007)     | <i>Salmonella</i> spp.                | 1   | 40  | 2.5%  | 3   | 56  | 5.4%  | <b>Adult</b>    | <b>No</b>                     | ROPI                                   |                                                                      |
| Kapperud & Rosef (1983)                 | <i>Salmonella</i> spp.                | 2   | 125 | 1.6%  | 2   | 54  | 3.7%  | <b>Adult</b>    | <b>No</b>                     | Larus spp.                             |                                                                      |
| Monaghan <i>et al.</i> (1985)           | <i>Salmonella</i> spp.                | 24  | 125 | 19.2% | 63  | 552 | 11.4% | <b>Juvenile</b> | <b>No</b>                     | HERG                                   |                                                                      |
| Butterfield <i>et al.</i> (1983)        | <i>Salmonella</i> spp.                | 3   | 118 | 2.5%  | 9   | 656 | 1.4%  | <b>Juvenile</b> | <b>No</b>                     | HERG                                   | November–February                                                    |
| Sulzner <i>et al.</i> (2014)            | <i>Salmonella enterica</i>            | N/A | N/A | N/A   | N/A | N/A | N/A   | <b>Same</b>     | <b>No</b>                     | TUVU                                   | Author doesn't report numbers tested but reports statistical results |
| Wood & Trust (1972)                     | <i>Salmonella</i> spp.                | 0   | 103 | 0.0%  | 0   | 51  | 0.0%  | <b>Same</b>     | <b>No</b>                     | GWGU                                   |                                                                      |

|                                  |                               |     |     |        |     |     |        |          |            |                                        |                                                                                                                             |
|----------------------------------|-------------------------------|-----|-----|--------|-----|-----|--------|----------|------------|----------------------------------------|-----------------------------------------------------------------------------------------------------------------------------|
| Levesque <i>et al.</i> (2000)    | <i>Salmonella</i> spp.        | N/A | N/A | N/A    | N/A | N/A | N/A    | Same     | No         | RBGU                                   | Testing bacterial concentration in CFU/g rather than prevalence                                                             |
| Grigar <i>et al.</i> (2017)      | <i>Salmonella</i> spp.        | 0   | 43  | 0.0%   | 2   | 332 | 0.6%   | Adult    | Not tested | BWTE, REDH                             |                                                                                                                             |
| Phalen <i>et al.</i> (2010)      | <i>Salmonella</i> spp.        | 82  | 135 | 60.7%  | 0   | 10  | 0.0%   | Juvenile | Not tested | CAEG                                   |                                                                                                                             |
| Sinai <i>et al.</i> (2017)       | <i>Salmonella</i> spp.        | 0   | 7   | 0.0%   | 0   | 22  | 0.0%   | Same     | Not tested | GRSC                                   |                                                                                                                             |
| Toro <i>et al.</i> (1999)        | <i>Salmonella</i> spp.        | N/A | N/A | N/A    | N/A | N/A | N/A    | Same     | Not tested | ROPI                                   | “The results...are presented as a group because there were no important differences among them depending on...age” (p. 620) |
| Hughes <i>et al.</i> (2008)      | <i>Salmonella</i> spp.        | 12  | 12  | 100.0% | 11  | 11  | 100.0% | Same     | Not tested | HOSP, EUST, EUCD, HERG, European birds | Necropsies                                                                                                                  |
| Lillehaug <i>et al.</i> (2005)   | <i>Salmonella</i> spp.        | 0   | 102 | 0.0%   | 0   | 103 | 0.0%   | Same     | Not tested | ROPI, MALL                             |                                                                                                                             |
| Daoust <i>et al.</i> (2000)      | <i>Salmonella</i> Typhimurium | 12  | 12  | 100.0% | 31  | 31  | 100.0% | Same     | Not tested | PISI, PUF1, EVGR, AMGO, CORE           | Necropsies                                                                                                                  |
| Fukui <i>et al.</i> (2014)       | <i>Salmonella</i> Typhimurium | 13  | 13  | 100.0% | 8   | 8   | 100.0% | Same     | Not tested | ETSP                                   | Necropsies                                                                                                                  |
| Butterfield <i>et al.</i> (1983) | <i>Salmonella</i> spp.        | 25  | 258 | 9.7%   | 18  | 902 | 2.0%   | Juvenile | Yes        | HERG                                   | July–October                                                                                                                |
| Hernandez <i>et al.</i> (2016)   | <i>Salmonella</i> spp.        | 8   | 22  | 36.4%  | 4   | 33  | 12.1%  | Nestling | Yes        | WHIB                                   | Nestling>subadult>adult                                                                                                     |

**Table S6.** Summary of studies reporting coinfection data. Bird species are identified according to AOU four-letter codes (see Supplementary Data S2).

| Study                          | Bacteria                                                                                                                                                                                                                                                                                            | Positive | Tested | Prevalence | Birds                            | Notes                                                                      |
|--------------------------------|-----------------------------------------------------------------------------------------------------------------------------------------------------------------------------------------------------------------------------------------------------------------------------------------------------|----------|--------|------------|----------------------------------|----------------------------------------------------------------------------|
| Borilova <i>et al.</i> (2007)  | <i>C. coli</i> / <i>C. jejuni</i>                                                                                                                                                                                                                                                                   | 3        | 200    | 1.5%       | RNPH                             |                                                                            |
| Callaway <i>et al.</i> (2014)  | <i>Salmonella</i> / <i>E. coli</i> O157:H7                                                                                                                                                                                                                                                          | 3        | 376    | 0.8%       | BHCO, COGR                       |                                                                            |
| Doumandji <i>et al.</i> (2010) | <i>Salmonella</i> /generic <i>E. coli</i>                                                                                                                                                                                                                                                           | 1        | 34     | 2.9%       | CAEG                             |                                                                            |
| Fichtel (1978)                 | <i>Salmonella</i> /Sacrosporidiosis (fungus)                                                                                                                                                                                                                                                        | 2        | 6      | 33.3%      | NOCA, WTSP, DEJU                 |                                                                            |
| Gaukler <i>et al.</i> (2009)   | <i>Salmonella</i> /generic <i>E. coli</i>                                                                                                                                                                                                                                                           | 3        | 434    | 0.7%       | EUST                             |                                                                            |
| Gibbs <i>et al.</i> (2007)     | <i>E. coli</i> / <i>Serratia</i> spp.                                                                                                                                                                                                                                                               | 1        | 21     | 4.8%       | YHBL                             |                                                                            |
| Gibbs <i>et al.</i> (2007)     | <i>E. coli</i> / <i>Enterobacter</i> spp.                                                                                                                                                                                                                                                           | 1        | 21     | 4.8%       | YHBL                             |                                                                            |
| Glunder <i>et al.</i> (1992)   | <i>C. jejuni</i> / <i>Salmonella</i> Typhimurium                                                                                                                                                                                                                                                    | 2        | 37     | 5.4%       | HERG                             |                                                                            |
| Kalisinka <i>et al.</i> (2008) | <i>E. coli</i> /trematodes ( <i>Strigea falconis</i> , <i>Conodiplostomum spathula</i> )/cestodes ( <i>Cladotaenia cylindracea</i> )/nematodes ( <i>Serratospiculum tendo</i> )/ <i>Aspergillus nidulans</i> / <i>Cladophialophora boppi</i> / <i>Micrococcus luteus</i> / <i>Proteus mirabilis</i> | 1        | 1      | 100.0%     | PEFA                             |                                                                            |
| Kapperud & Rosef (1983)        | <i>C. jejuni</i> /nalidixic acid-resistant thermophilic <i>Campylobacters</i>                                                                                                                                                                                                                       | 3        | 138    | 2.2%       | Larus spp.                       |                                                                            |
| Levre <i>et al.</i> (1989)     | <i>Campylobacter</i> spp./ <i>Salmonella</i> spp.                                                                                                                                                                                                                                                   | 1        | 217    | 0.5%       | GRAP, RNPH, EUST, European birds |                                                                            |
| Levre <i>et al.</i> (1989)     | <i>Campylobacter</i> spp./ <i>Salmonella</i> spp./ <i>Yersinia</i> spp.                                                                                                                                                                                                                             | 1        | 217    | 0.5%       | GRAP, RNPH, EUST, European birds |                                                                            |
| Levre <i>et al.</i> (1989)     | <i>Campylobacter</i> spp./ <i>Yersinia</i> spp.                                                                                                                                                                                                                                                     | 9        | 217    | 4.1%       | GRAP, RNPH, EUST, European birds |                                                                            |
| Moriarty <i>et al.</i> (2011)  | <i>Campylobacter</i> spp./ <i>E. coli</i>                                                                                                                                                                                                                                                           | N/A      | 320    | N/A        | CANG                             | Spearman rank correlation analysis $r_s = 0.116$ between bacterial species |
| Nebola <i>et al.</i> (2007)    | <i>C. coli</i> / <i>C. jejuni</i>                                                                                                                                                                                                                                                                   | 3        | 55     | 5.5%       | RNPH                             |                                                                            |

|                                      |                                                                                               |    |      |        |                                                      |                                                     |
|--------------------------------------|-----------------------------------------------------------------------------------------------|----|------|--------|------------------------------------------------------|-----------------------------------------------------|
| Oteo <i>et al.</i> (2018)            | Generic <i>E. coli</i> / <i>Klebsiella pneumoniae</i>                                         | 2  | 95   | 2.1%   | Gulls, egrets, vultures, owls, ducks, European birds |                                                     |
| Pao <i>et al.</i> (2014)             | <i>C. jejuni</i> / <i>Salmonella</i> spp.                                                     | 0  | 446  | 0.0%   | EUST, BHCO, MODO, CHSP, HOSP, ROPI, and others       |                                                     |
| Pennycott <i>et al.</i> (2006)       | <i>Salmonella</i> Typhimurium/ <i>Ichthyocotylurus platycephalus</i> (trematode)              | 1  | 495  | 0.2%   | HOSP, ETSP, ROPI, HERG, European birds               | Necropsies                                          |
| Pennycott <i>et al.</i> (2006)       | <i>Salmonella</i> Typhimurium/ <i>Pasteurella</i> spp.                                        | 1  | 495  | 0.2%   | HOSP, ETSP, ROPI, HERG, European birds               | Necropsies                                          |
| Pennycott <i>et al.</i> (2006)       | <i>Salmonella</i> Typhimurium/Avian tuberculosis ( <i>Mycobacterium avium</i> )               | 1  | 495  | 0.2%   | HOSP, ETSP, ROPI, HERG, European birds               | Necropsies                                          |
| Radwan & Lampky (1972)               | <i>Salmonella</i> Typhimurium/generic <i>E. coli</i>                                          | 1  | 5    | 20.0%  | HERG, RTHU, ATSP, HOSP, OVEN                         | Can infer for these five because one tested of each |
| Robino <i>et al.</i> (2010)          | <i>C. coli</i> / <i>C. jejuni</i>                                                             | 5  | 116  | 4.3%   | Hooded crows, MALL, HOSP, ROPI                       |                                                     |
| Sovada <i>et al.</i> (2008)          | BoNT Type C/ <i>Salmonella</i>                                                                | 3  | 28   | 10.7%  | AWPE                                                 |                                                     |
| Sovada <i>et al.</i> (2008)          | WNV/ <i>Salmonella</i>                                                                        | 8  | 40   | 20.0%  | AWPE                                                 |                                                     |
| Vasconcelos <i>et al.</i> (2017)     | <i>E. coli</i> / <i>Pseudomonas aeruginosa</i>                                                | 1  | 1    | 100.0% | ROPI                                                 |                                                     |
| Vaughan-Higgins <i>et al.</i> (2013) | Nematodes ( <i>Cyathostoma</i> , <i>Porracaecum</i> ), metazoan parasite eggs, <i>E. coli</i> | 1  | 1    | 100.0% | NOHA                                                 |                                                     |
| Waldenstrom <i>et al.</i> (2002)     | <i>C. coli</i> / <i>C. jejuni</i>                                                             | 10 | 1794 | 0.6%   | N/A                                                  |                                                     |
| Yogasundram <i>et al.</i> (1989)     | <i>C. jejuni</i> /endoparasites                                                               | 11 | 445  | 2.5%   | Ducks, Galliformes, owls, doves, etc.                | Some turned in for necropsy and some hunted         |
| Yogasundram <i>et al.</i> (1989)     | <i>C. jejuni</i> /fungal infection                                                            | 7  | 445  | 1.6%   | Ducks, Galliformes, owls, doves, etc.                | Some turned in for necropsy and some hunted         |
| Yogasundram <i>et al.</i> (1989)     | <i>C. jejuni</i> /protozoan infection                                                         | 3  | 445  | 0.7%   | Ducks, Galliformes, owls, doves, etc.                | Some turned in for necropsy and some hunted         |
| Yogasundram <i>et al.</i> (1989)     | <i>C. jejuni</i> /viral infection                                                             | 4  | 445  | 0.9%   | Ducks, Galliformes, owls, doves, etc.                | Some turned in for necropsy and some hunted         |
| Yogasundram <i>et al.</i> (1989)     | <i>C. jejuni</i> /other bacterial infection                                                   | 7  | 445  | 1.6%   | Ducks, Galliformes, owls, doves, etc.                | Some turned in for necropsy and some hunted         |

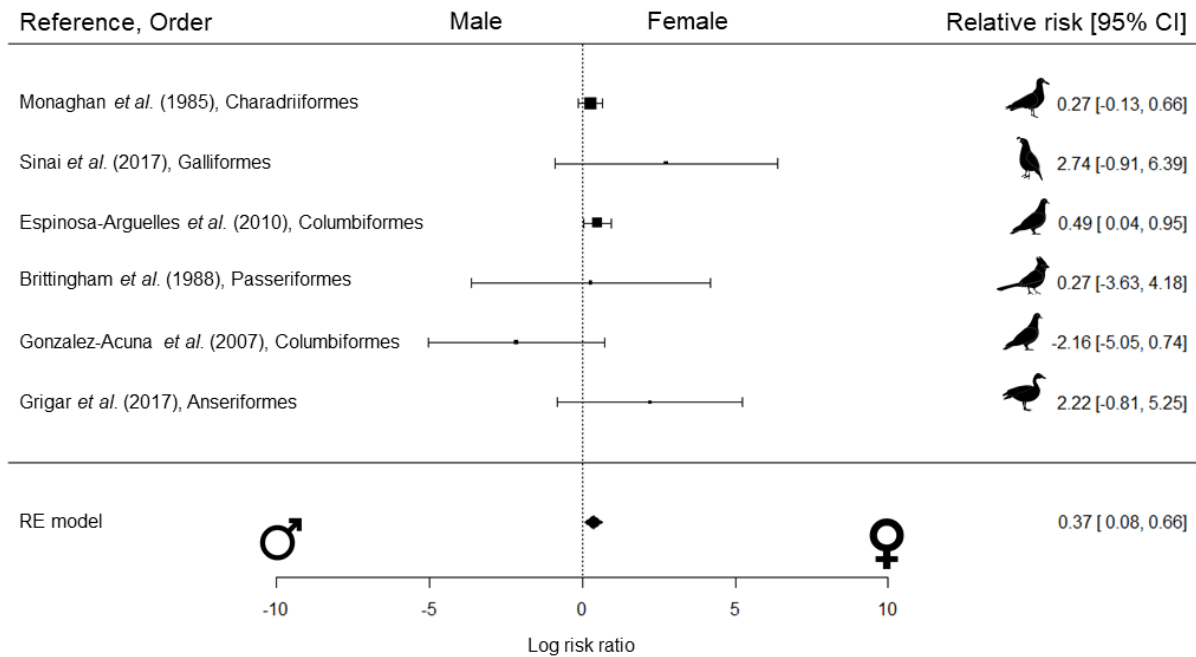

**Fig. S3.** Forest plot showing the results of six studies examining the difference in *Salmonella* spp. prevalence in female *versus* male birds. The figure shows the relative risk of detecting *Salmonella* spp. in female (right of 0) *versus* male (left of 0) birds with corresponding 95% confidence intervals in the individual studies using a random effects model in the metaphor package in R.

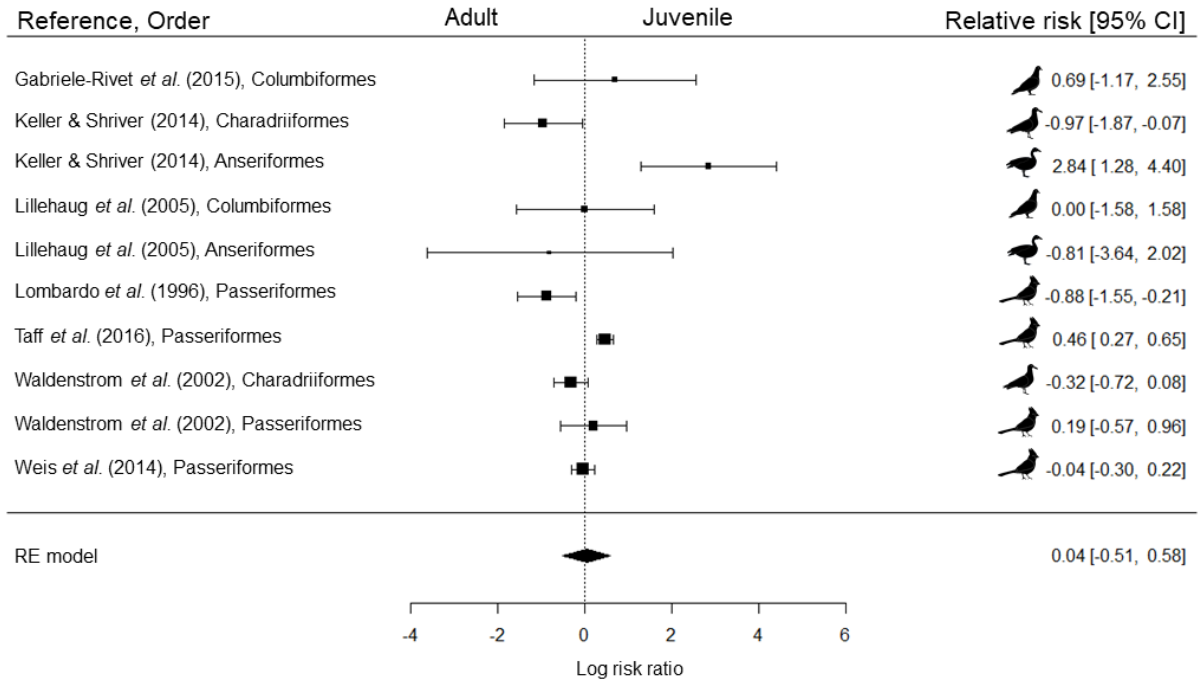

**Fig. S4.** Forest plot showing the results of 10 estimates from seven studies examining the difference in *Campylobacter* spp. prevalence in juvenile versus adult birds from four orders. The figure shows the relative risk of detecting *Campylobacter* spp. in adult (left of 0) *versus* juvenile (right of 0) birds with corresponding 95% confidence intervals in the individual studies using a random effects model in the metaphor package in R.



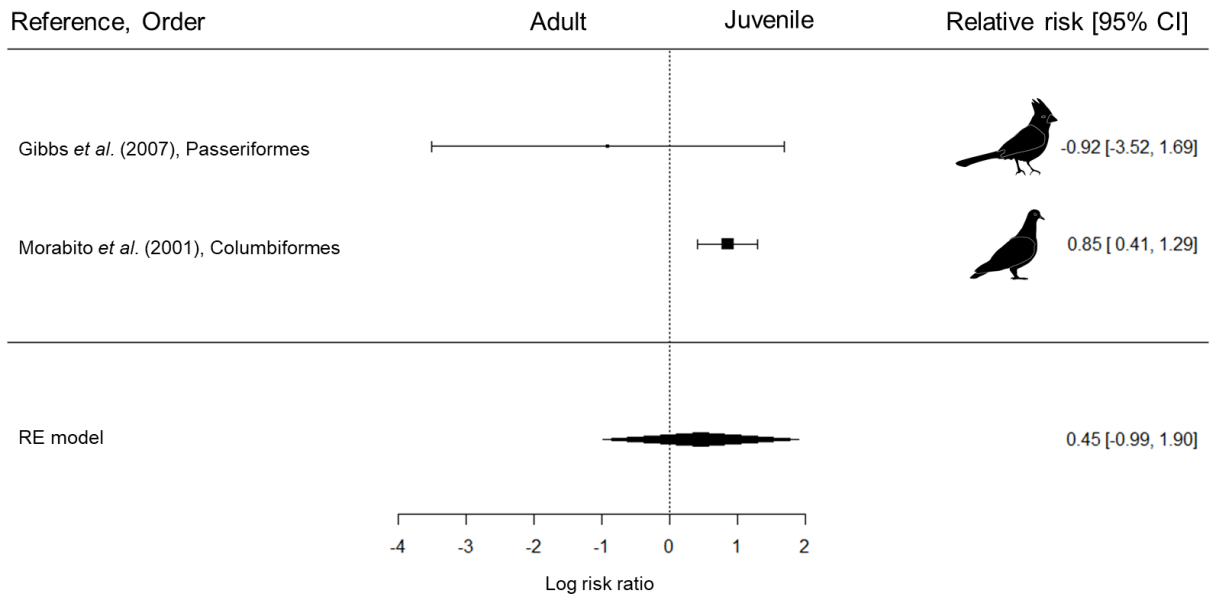

**Fig. S5.** Forest plot showing the results of two estimates from two studies examining the difference in pathogenic *E. coli* prevalence in juvenile *versus* adult birds. The figure shows the relative risk of detecting pathogenic *E. coli* in adult (left of 0) *versus* juvenile (right of 0) birds with corresponding 95% confidence intervals in the individual studies using a random effects model in the metaphor package in R.

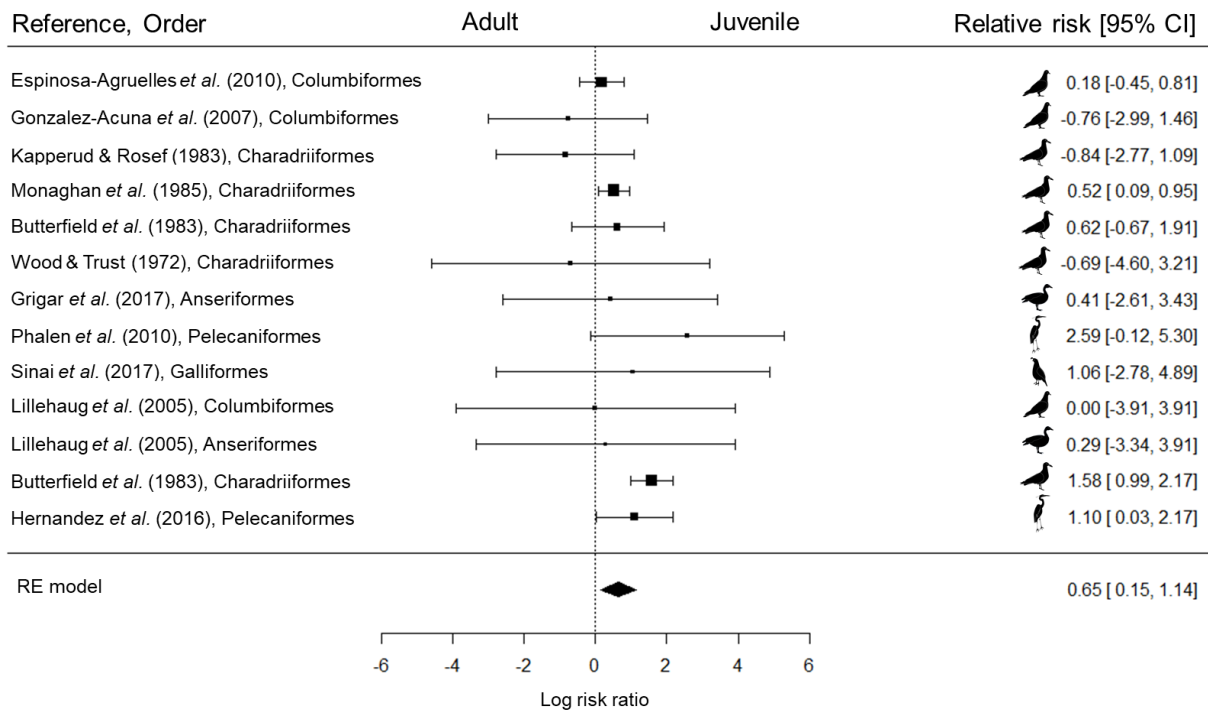

**Fig. S6.** Forest plot showing the results of 13 estimates from 12 studies examining the difference in *Salmonella* spp. prevalence in juvenile *versus* adult birds. The figure shows the relative risk of detecting *Salmonella* spp. in adult (left of 0) *versus* juvenile (right of 0) birds with corresponding 95% confidence intervals in the individual studies using a random effects model in the metaphor package in R.

**Table S7.** Studies reporting data on pathogen prevalence *versus* condition metrics. Bird species are identified according to AOU four-letter codes (see Supplementary Data S2). Studies that found significant relationships are highlighted in bold. N/A, not available.

| Study                               | Bacteria                  | Condition metric   | Significant | Direction       | Species                           | Notes                                                                   |
|-------------------------------------|---------------------------|--------------------|-------------|-----------------|-----------------------------------|-------------------------------------------------------------------------|
| Taff & Townsend (2017)              | <i>C. jejuni</i>          | Condition index    | <b>Yes</b>  | <b>Negative</b> | AMCR                              | Adult crows in winter                                                   |
| Colles <i>et al.</i> (2009)         | <i>C. jejuni</i>          | Mass               | <b>Yes</b>  | <b>Negative</b> | EUST                              |                                                                         |
| Taff & Townsend (2017)              | <i>C. jejuni</i>          | Mass               | <b>Yes</b>  | <b>Negative</b> | AMCR                              | Adult crows in winter                                                   |
| Colles <i>et al.</i> (2009)         | <i>C. jejuni</i>          | Wing cord          | <b>Yes</b>  | <b>Negative</b> | EUST                              |                                                                         |
| Gabriele-Rivet <i>et al.</i> (2015) | <i>C. jejuni</i>          | Body score         | <b>Yes</b>  | <b>Positive</b> | ROPI                              | Score 1 (very thin) to 5 (very fat)                                     |
| Gabriele-Rivet <i>et al.</i> (2015) | <i>C. jejuni</i>          | Condition index    | No          |                 | ROPI                              | Weight in g/average metatarsus length                                   |
| Taff & Townsend (2017)              | <i>C. jejuni</i>          | Condition index    | No          |                 | AMCR                              | Nestlings                                                               |
| Gabriele-Rivet <i>et al.</i> (2015) | <i>C. jejuni</i>          | Metatarsus length  | No          |                 | ROPI                              |                                                                         |
| Taff & Townsend (2017)              | <i>C. jejuni</i>          | Skeletal size      | No          |                 | AMCR                              | Adult crows in winter                                                   |
| Mills <i>et al.</i> (1999)          | <i>Campylobacter</i> spp. | Left tarsus length | <b>Yes</b>  | <b>Positive</b> | TRES                              | Nestlings                                                               |
| Waldenstrom <i>et al.</i> (2002)    | <i>Campylobacter</i> spp. | Mass               | <b>Yes</b>  | <b>Positive</b> | European birds (66 species), EUST | Tested whether larger body size led to higher prevalence across species |
| Hald <i>et al.</i> (2016)           | <i>Campylobacter</i> spp. | Fat score          | No          |                 | ROPI, HOSP, ETSP, EUST,           |                                                                         |

|                               |                                                                                                                                |                    |            |                 |                |                   |
|-------------------------------|--------------------------------------------------------------------------------------------------------------------------------|--------------------|------------|-----------------|----------------|-------------------|
|                               |                                                                                                                                |                    |            |                 | European birds |                   |
| Mills <i>et al.</i> (1999)    | <i>Campylobacter</i> spp.                                                                                                      | Left wing length   | No         |                 | TRES           | Nestlings         |
| Mills <i>et al.</i> (1999)    | <i>Campylobacter</i> spp.                                                                                                      | Mass               | No         |                 | TRES           | Nestlings         |
| Vazquez <i>et al.</i> (2010)  | <i>Campylobacter</i> spp.                                                                                                      | Mass               | No         |                 | ROPI           |                   |
| Vazquez <i>et al.</i> (2010)  | <i>Campylobacter</i> spp.                                                                                                      | Packed cell volume | No         |                 | ROPI           |                   |
| Mills <i>et al.</i> (1999)    | <i>Campylobacter</i> spp.                                                                                                      | Tarsus asymmetry   | No         |                 | TRES           | Nestlings         |
| Vazquez <i>et al.</i> (2010)  | <i>Campylobacter</i> spp.                                                                                                      | Tarsus length      | No         |                 | ROPI           |                   |
| Mills <i>et al.</i> (1999)    | <i>Campylobacter</i> spp.                                                                                                      | Wing asymmetry     | No         |                 | TRES           | Nestlings         |
| Vazquez <i>et al.</i> (2010)  | <i>Campylobacter</i> spp.                                                                                                      | Wing cord          | No         |                 | ROPI           |                   |
| Mills <i>et al.</i> (1999)    | <i>Campylobacter</i> spp.                                                                                                      | Wing parasites     | No         |                 | TRES           | Nestlings         |
| Mills <i>et al.</i> (1999)    | Desoxycholate citrate lactose sugar agar (DCLS) media for <i>E. coli</i> , <i>Salmonella</i> , <i>Vibrio</i> , <i>Shigella</i> | Tarsus asymmetry   | <b>Yes</b> | <b>Negative</b> | TRES           | Nestlings         |
| Mills <i>et al.</i> (1999)    | DCLS media for <i>E. coli</i> , <i>Salmonella</i> , <i>Vibrio</i> , <i>Shigella</i>                                            | Left tarsus length | <b>Yes</b> | <b>Positive</b> | TRES           | Nestlings         |
| Mills <i>et al.</i> (1999)    | DCLS media for <i>E. coli</i> , <i>Salmonella</i> , <i>Vibrio</i> , <i>Shigella</i>                                            | Left wing length   | No         |                 | TRES           | Nestlings         |
| Mills <i>et al.</i> (1999)    | DCLS media for <i>E. coli</i> , <i>Salmonella</i> , <i>Vibrio</i> , <i>Shigella</i>                                            | Mass               | No         |                 | TRES           | Nestlings         |
| Mills <i>et al.</i> (1999)    | DCLS media for <i>E. coli</i> , <i>Salmonella</i> , <i>Vibrio</i> , <i>Shigella</i>                                            | Wing asymmetry     | No         |                 | TRES           | Nestlings         |
| Mills <i>et al.</i> (1999)    | DCLS media for <i>E. coli</i> , <i>Salmonella</i> , <i>Vibrio</i> , <i>Shigella</i>                                            | Wing parasites     | No         |                 | TRES           | Nestlings         |
| Morabito <i>et al.</i> (2001) | <i>E. coli</i> (STEC)                                                                                                          | Mass               | <b>Yes</b> | <b>Negative</b> | ROPI           | Juvenile/subadult |

|                                         |                                       |                 |            |                 |                             |                                                                             |
|-----------------------------------------|---------------------------------------|-----------------|------------|-----------------|-----------------------------|-----------------------------------------------------------------------------|
| Morabito <i>et al.</i> (2001)           | <i>E. coli</i> (STEC)                 | Mass            | No         |                 | ROPI                        | Adult                                                                       |
| Kalisinka <i>et al.</i> (2008)          | Generic <i>E. coli</i>                | Condition index | Not tested | Negative        | PEFA                        | One bird tested                                                             |
| Gaukler <i>et al.</i> (2009)            | Generic <i>E. coli</i>                | Mass            | No         |                 | EUST                        |                                                                             |
| Monaghan <i>et al.</i> (1985)           | <i>Salmonella</i> spp.                | Scaled mass     | No         |                 | HERG                        |                                                                             |
| Espinosa-Arguelles <i>et al.</i> (2010) | <i>Salmonella</i> Gallinarum-Pullorum | Mass            | <b>Yes</b> | <b>Negative</b> | MODO, WWDO                  |                                                                             |
| Lawson <i>et al.</i> (2010)             | <i>Salmonella</i> spp.                | Mass            | Not tested | Negative        | HOSP                        | Salmonellosis cases <i>versus</i> trauma cases                              |
| Fichtel (1978)                          | <i>Salmonella</i> Typhimurium         | Mass            | Not tested | Negative        | NOCA, American tree sparrow | Compared weight at death to earlier banding records for Salmonellosis cases |
| Fukui <i>et al.</i> (2014)              | <i>Salmonella</i> Typhimurium         | Mass            | <b>Yes</b> | <b>Negative</b> | ETSP                        | Compared Salmonellosis case birds to healthy birds                          |

**Table S8.** Bacterial concentration shed in wild bird faeces and duration of shedding for naturally occurring faeces (surveys) and inoculation experiments. Bird species are identified according to AOU four-letter codes (see Supplementary Data S2). CE = cell equivalents, CFU = colony forming units, MPN = most probable number

| Study                         | Species | Species/strain              | Average                                  | Minimum                   | Maximum                     | Inoculum Concentration              | Mean duration (d) | Max duration (d) | Sample size | Study duration (d) | Type       | Notes                                                                                                                                                                                                                                 |
|-------------------------------|---------|-----------------------------|------------------------------------------|---------------------------|-----------------------------|-------------------------------------|-------------------|------------------|-------------|--------------------|------------|---------------------------------------------------------------------------------------------------------------------------------------------------------------------------------------------------------------------------------------|
| Atterby <i>et al.</i> (2018)  | MALL    | <i>C. jejuni</i> mallard ST | 10 <sup>4</sup> — 10 <sup>6</sup> CFU/ml | 10 <sup>3</sup> CFU/ml    | 10 <sup>8</sup> CFU/ml      | 5 × 10 <sup>4</sup> CFU/ml of water | 18                | 18               | 10          | 18                 | Experiment | Data from Experiment 1 only. All birds shed for full 18 days of study.                                                                                                                                                                |
| Atterby <i>et al.</i> (2018)  | MALL    | <i>C. jejuni</i> thrush ST  | 10 <sup>3</sup> — 10 <sup>4</sup> CFU/ml | 10 <sup>2</sup> CFU/ml    | 10 <sup>7</sup> CFU/ml      | 5 × 10 <sup>4</sup> CFU/ml of water |                   | 16               | 10          | 18                 | Experiment | Data from Experiment 1 only. Mean value of 10 <sup>3</sup> — 10 <sup>4</sup> CFU/ml occurred in first few days of experiment. Discrepancy in maximum shedding duration reported in main text abstract, results, and supporting table. |
| Atterby <i>et al.</i> (2018)  | MALL    | <i>C. jejuni</i> chicken ST | 10 <sup>4</sup> CFU/ml                   | 10 <sup>2</sup> CFU/ml    | 10 <sup>6</sup> CFU/ml      | 5 × 10 <sup>4</sup> CFU/ml of water |                   | 18               | 10          | 18                 | Experiment | Data from Experiment 1 only. 2/6 birds still shed bacteria at day 18. 10 <sup>4</sup> CFU/ml described as “peak mean level” [p. 3]                                                                                                    |
| Glunder <i>et al.</i> (1992)  | HERG    | <i>C. jejuni</i>            |                                          |                           |                             |                                     |                   | 35               | 27          | 329                | Survey     | Taken into lab                                                                                                                                                                                                                        |
| Levesque <i>et al.</i> (2000) | HERG    | <i>Campylo bacter</i> spp.  | 2.44 × 10 <sup>5</sup> CFU/g             | 2 × 10 <sup>3</sup> CFU/g | 1.2 × 10 <sup>7</sup> CFU/g |                                     |                   |                  |             |                    | Survey     | Average for adults; min and max adult and juvenile                                                                                                                                                                                    |



|                                  |                   |                        |                                              |                         |                         |                          |   |    |    |    |  |            |                                                                                                            |
|----------------------------------|-------------------|------------------------|----------------------------------------------|-------------------------|-------------------------|--------------------------|---|----|----|----|--|------------|------------------------------------------------------------------------------------------------------------|
| Fogarty <i>et al.</i> (2003)     | <i>Larus</i> spp. | Generic <i>E. coli</i> | $1.4 \times 10^7$ to $4.9 \times 10^8$ CFU/g | $<10^5$ CFU/g           | $1.9 \times 10^9$ CFU/g |                          |   |    |    |    |  | Survey     |                                                                                                            |
| Lu <i>et al.</i> (2013)          | SACR              | Generic <i>E. coli</i> | $6.9 \times 10^7$ CE/g                       |                         |                         |                          |   |    |    |    |  | Survey     |                                                                                                            |
| Middleton & Ambrose (2005)       | CANG              | Generic <i>E. coli</i> | $3.6 \times 10^5$ CFU/g                      | 0                       | $1 \times 10^7$ CFU/g   |                          |   |    |    |    |  | Survey     |                                                                                                            |
| Moriarty <i>et al.</i> (2011)    | CANG              | Generic <i>E. coli</i> | $3.61 \times 10^4$ CFU/g                     |                         |                         |                          |   |    |    |    |  | Survey     |                                                                                                            |
| Murphy <i>et al.</i> (2005)      | MALL              | Generic <i>E. coli</i> | $1.36 \times 10^5$ CFU/g                     |                         |                         |                          |   |    |    |    |  | Survey     |                                                                                                            |
| Nelson <i>et al.</i> (2008)      | HERG              | Generic <i>E. coli</i> | $1.0 \times 10^6$ CFU/g                      | $1.9 \times 10^2$ CFU/g | $2.5 \times 10^9$ CFU/g |                          |   |    |    |    |  | Survey     |                                                                                                            |
| Vogel <i>et al.</i> (2013)       | SACR              | Generic <i>E. coli</i> | $2.8 \times 10^4$ MPN/g                      |                         |                         |                          |   |    | 30 |    |  | Survey     |                                                                                                            |
| Girdwood <i>et al.</i> (1985)    | HERG              | <i>Salmonella</i> spp. | 22 MPN/g                                     |                         | 170 MPN/g               |                          | 3 | 4  | 84 | 21 |  | Survey     | Taken into laboratory                                                                                      |
| Glunder <i>et al.</i> (1992)     | HERG              | <i>S. typhimurium</i>  |                                              |                         |                         |                          |   | 56 | 27 | 56 |  | Survey     | Taken into laboratory; one came in with <i>S. typhimurium</i> and spread to four others; treated at day 56 |
| Levesque <i>et al.</i> (2000)    | HERG              | <i>Salmonella</i> spp. | $1.9 \times 10^6$ CFU/g                      | $2.3 \times 10^2$ CFU/g | $2.4 \times 10^9$ CFU/g |                          |   |    |    |    |  | Survey     | Average for adults; min. and max. for adults and juveniles                                                 |
| Albuquerque <i>et al.</i> (2013) | ROPI              | <i>S. Enteritidis</i>  |                                              | $1.5 \times 10^4$ CFU/g | $2 \times 10^5$ CFU/g   | $9.5 \times 10^7$ CFU/ml |   | 14 | 24 | 35 |  | Experiment | Low dose inoculum                                                                                          |
| Albuquerque <i>et al.</i> (2013) | ROPI              | <i>S. Enteritidis</i>  |                                              | $1 \times 10^7$ CFU/g   | $2 \times 10^9$ CFU/g   | $9.5 \times 10^9$ CFU/ml |   | 7  | 24 | 35 |  | Experiment | High dose inoculum                                                                                         |





**Table S9.** Seasonal variation in bacterial prevalence and shedding. Bird species are identified according to AOU four-letter codes (see Supplementary Data S2). Studies that tested for significant differences between seasons are highlighted in bold.

| Study                            | Species/strain              | Highest prevalence        | Lowest prevalence | Significant | Highest concentration | Lowest concentration | Significant | Bird                                   | Notes                                       |
|----------------------------------|-----------------------------|---------------------------|-------------------|-------------|-----------------------|----------------------|-------------|----------------------------------------|---------------------------------------------|
| Pao <i>et al.</i> (2014)         | <i>Campylobacter</i> spp.   | <b>Same</b>               | <b>Same</b>       | <b>No</b>   |                       |                      |             | Passerines, doves                      |                                             |
| Colles <i>et al.</i> (2009)      | <i>Campylobacter coli</i>   | Same                      | Same              | Not tested  |                       |                      |             | EUST                                   | Always low                                  |
| Yogasundram <i>et al.</i> (1989) | <i>Campylobacter jejuni</i> | Autumn                    |                   | Not tested  |                       |                      |             | Ducks, Galliformes, owls, doves, etc.  | Some turned in for necropsy and some hunted |
| Colles <i>et al.</i> (2009)      | <i>Campylobacter lari</i>   | Spring                    |                   | Not tested  |                       |                      |             | EUST                                   |                                             |
| Sippy <i>et al.</i> (2012)       | <i>Campylobacter</i> spp.   | Autumn                    | Spring            | Not tested  |                       |                      |             | HOSP, RBGR, WTSP                       |                                             |
| Wahlstrom <i>et al.</i> (2003)   | <i>Campylobacter</i> spp.   | Spring                    | Summer            | Not tested  |                       |                      |             | Gulls                                  |                                             |
| Waldenstrom <i>et al.</i> (2002) | <i>Campylobacter</i> spp.   | Autumn                    | Spring            | Not tested  |                       |                      |             | European birds, EUST                   | Tested spring and autumn migration          |
| Taff <i>et al.</i> (2016)        | <i>Campylobacter jejuni</i> | <b>Winter</b>             | <b>Summer</b>     | <b>Yes</b>  |                       |                      |             | AMCR                                   |                                             |
| Colles <i>et al.</i> (2009)      | <i>Campylobacter jejuni</i> | <b>Summer</b>             | <b>Winter</b>     | <b>Yes</b>  |                       |                      |             | EUST                                   |                                             |
| Gargiulo <i>et al.</i> (2014)    | <i>Campylobacter jejuni</i> | <b>Summer</b>             | <b>Winter</b>     | <b>Yes</b>  |                       |                      |             | ROPI                                   |                                             |
| Mohan <i>et al.</i> (2013)       | <i>Campylobacter</i> spp.   | <b>Winter/<br/>Spring</b> | <b>Summer</b>     | <b>Yes</b>  |                       |                      |             | EUST, MALL                             |                                             |
| Vazquez <i>et al.</i> (2010)     | <i>Campylobacter</i> spp.   | <b>Spring</b>             | <b>Autumn</b>     | <b>Yes</b>  |                       |                      |             | ROPI                                   |                                             |
| Hald <i>et al.</i> (2016)        | <i>Campylobacter</i> spp.   | <b>Summer</b>             | <b>Winter</b>     | <b>Yes</b>  |                       |                      |             | ROPI, HOSP, ETSP, EUST, European birds |                                             |

|                                   |                                                                             |                      |               |            |             |        |            |                                                            |                              |
|-----------------------------------|-----------------------------------------------------------------------------|----------------------|---------------|------------|-------------|--------|------------|------------------------------------------------------------|------------------------------|
| Levesque <i>et al.</i> (2000)     | <i>Campylobacter</i> spp.                                                   |                      |               |            | <b>Same</b> |        | <b>No</b>  | RBGU                                                       |                              |
| Morabito <i>et al.</i> (2001)     | Shiga toxin-producing <i>E. coli</i> (STEC)                                 | <b>Summer</b>        | <b>Winter</b> | <b>No</b>  |             |        |            | ROPI                                                       |                              |
| Hsu <i>et al.</i> (2016)          | <i>E. coli</i>                                                              | Winter               |               | Not tested |             |        |            | CANG                                                       |                              |
| Medhanie <i>et al.</i> (2014)     | <i>E. coli</i> O157:H7                                                      | Autumn/Winter        |               | Not tested |             |        |            | EUST                                                       |                              |
| Medhanie <i>et al.</i> (2014)     | <i>E. coli</i> O157:H7                                                      | Autumn               |               | Not tested |             |        |            | EUST                                                       |                              |
| Kullas <i>et al.</i> (2002)       | <i>E. coli</i>                                                              | <b>Summer</b>        | <b>Winter</b> | <b>Yes</b> |             |        |            | CANG                                                       |                              |
| Gargiulo <i>et al.</i> (2014)     | <i>E. coli</i> O157                                                         | <b>Summer</b>        | <b>Winter</b> | <b>Yes</b> |             |        |            | ROPI                                                       |                              |
| Pedersen <i>et al.</i> (2006)     | Pathogenic <i>E. coli</i>                                                   | <b>Summer/Autumn</b> | <b>Winter</b> | <b>Yes</b> |             |        |            | ROPI                                                       |                              |
| Hughes <i>et al.</i> (2009)       | STEC ( <i>stx1</i> ) (Shiga toxin-producing <i>E. coli</i> attachment gene) | <b>Autumn</b>        | <b>Winter</b> | <b>Yes</b> |             |        |            | Owls, ducks, geese, doves, passerines, falcons, shorebirds |                              |
| Hughes <i>et al.</i> (2009)       | STEC ( <i>stx1</i> ) (Shiga toxin-producing gene for <i>E. coli</i> )       | <b>Summer</b>        | <b>Winter</b> | <b>Yes</b> |             |        |            | Owls, ducks, geese, doves, passerines, falcons, shorebirds |                              |
| Hughes <i>et al.</i> (2009)       | STEC ( <i>stx2</i> ) (Shiga toxin-producing gene for <i>E. coli</i> )       | <b>Autumn</b>        | <b>Spring</b> | <b>Yes</b> |             |        |            | Owls, ducks, geese, doves, passerines, falcons, shorebirds |                              |
| Middleton & Ambrose (2005)        | Generic <i>E. coli</i>                                                      | Autumn               | Winter        | Not tested | Winter      | Autumn | Not tested | CANG                                                       |                              |
| Gaukler <i>et al.</i> (2009)      | Generic <i>E. coli</i>                                                      | <b>Summer</b>        | <b>Winter</b> | <b>Yes</b> |             |        |            | EUST                                                       |                              |
| Torres-Mejia <i>et al.</i> (2018) | <i>Salmonella</i> Braenderup                                                | <b>Same</b>          | <b>Same</b>   | <b>No</b>  |             |        |            | ROPI                                                       | Dry <i>versus</i> wet season |
| Monaghan <i>et al.</i> (1985)     | <i>Salmonella</i> spp.                                                      | <b>Same</b>          | <b>Same</b>   | <b>No</b>  |             |        |            | HERG                                                       | Male                         |

|                                   |                               |               |        |            |  |  |  |                                                       |            |
|-----------------------------------|-------------------------------|---------------|--------|------------|--|--|--|-------------------------------------------------------|------------|
| Pedersen <i>et al.</i> (2006)     | <i>Salmonella</i> spp.        | Same          | Same   | No         |  |  |  | ROPI                                                  |            |
| Butterfield <i>et al.</i> (1983)  | <i>Salmonella</i> spp.        | Same          | Same   | No         |  |  |  | HERG                                                  | Adults     |
| Hernandez <i>et al.</i> (2016)    | <i>Salmonella</i> spp.        | Same          |        | No         |  |  |  | WHIB                                                  |            |
| Galbraith <i>et al.</i> (2017)    | <i>Salmonella</i> Typhimurium | Same          |        | No         |  |  |  | HOSP                                                  |            |
| Skov <i>et al.</i> (2008)         | <i>Salmonella</i> Typhimurium | Same          | Same   | No         |  |  |  | BARS, HOSP, EUST, European birds                      |            |
| Coulson <i>et al.</i> (1983)      | <i>Salmonella</i> Montevideo  | Same          |        | Not tested |  |  |  | HERG                                                  |            |
| Millan <i>et al.</i> (2004)       | <i>Salmonella</i> spp.        | Winter/Spring |        | Not tested |  |  |  | Raptors                                               | Necropsies |
| Williams <i>et al.</i> (1977)     | <i>Salmonella</i> spp.        | Autumn        |        | Not tested |  |  |  | Gull                                                  |            |
| Gaukler <i>et al.</i> (2009)      | <i>Salmonella</i> spp.        | Same          |        | Not tested |  |  |  | EUST                                                  |            |
| Girdwood <i>et al.</i> (1985)     | <i>Salmonella</i> spp.        | Autumn        | Winter | Not tested |  |  |  | HERG                                                  |            |
| Gorski <i>et al.</i> (2011)       | <i>Salmonella</i> spp.        | Summer        |        | Not tested |  |  |  | AMCR, WCSP, SPTO                                      |            |
| Hughes <i>et al.</i> (2008)       | <i>Salmonella</i> spp.        | Winter        | Summer | Not tested |  |  |  | EUST, HOSP, EUCD, HERG, European birds                | Necropsies |
| Lawson <i>et al.</i> (2010)       | <i>Salmonella</i> spp.        | Winter        |        | Not tested |  |  |  | HOSP, European birds                                  | Necropsies |
| Lopez-Martin <i>et al.</i> (2011) | <i>Salmonella</i> spp.        | Winter        | Summer | Not tested |  |  |  | FRGU, Kelp Gull                                       |            |
| Pennycott <i>et al.</i> (2006)    | <i>Salmonella</i> Typhimurium | Winter        |        | Not tested |  |  |  | HOSP, ETSP, ROPI, gulls, raptors, European passerines | Necropsies |
| Refsum <i>et al.</i> (2002)       | <i>Salmonella</i> Typhimurium | Winter/Spring |        | Not tested |  |  |  | Small passerines                                      | Necropsies |
| Refsum <i>et al.</i> (2002)       | <i>Salmonella</i> Typhimurium | Same          | Same   | Not tested |  |  |  | Gulls, ducks, doves, corvids, geese, murre, raptors   | Necropsies |
| Wobeser & Finlayson (1969)        | <i>Salmonella</i> Typhimurium | Winter        |        | Not tested |  |  |  | HOSP                                                  | Necropsies |

|                                     |                               |               |               |            |             |  |           |                              |            |
|-------------------------------------|-------------------------------|---------------|---------------|------------|-------------|--|-----------|------------------------------|------------|
| Daoust <i>et al.</i> (2000)         | <i>Salmonella</i> Typhimurium | Winter/Spring |               | Not tested |             |  |           | PISI, PUFI, EVGR, AMGO, CORE | Necropsies |
| Faddoul <i>et al.</i> (1966)        | <i>Salmonella</i> Typhimurium | Winter        |               | Not tested |             |  |           | BHCO, HOSP, HERG, WTSP       | Necropsies |
| Fukui <i>et al.</i> (2014)          | <i>Salmonella</i> Typhimurium | Winter        |               | Not tested |             |  |           | ETSP                         | Necropsies |
| Grigar <i>et al.</i> (2016)         | <i>Salmonella</i> Typhimurium | Summer        | Spring        | Not tested |             |  |           | GTGR                         |            |
| Hernandez <i>et al.</i> (2012)      | <i>Salmonella</i> Typhimurium | Winter        |               | Not tested |             |  |           | PISI, NOCA                   | Necropsies |
| Hurvell <i>et al.</i> (1975)        | <i>Salmonella</i> Typhimurium | Winter        | Autumn        | Not tested |             |  |           | HOSP, ETSP, European birds   | Necropsies |
| Monaghan <i>et al.</i> (1985)       | <i>Salmonella</i> spp.        | <b>Winter</b> | <b>Summer</b> | <b>Yes</b> |             |  |           | HERG                         | Female     |
| Rodriguez <i>et al.</i> (2012)      | <i>Salmonella</i> spp.        | <b>Autumn</b> | <b>Spring</b> | <b>Yes</b> |             |  |           | FRGU                         |            |
| Butterfield <i>et al.</i> (1983)    | <i>Salmonella</i> spp.        | <b>Summer</b> | <b>Winter</b> | <b>Yes</b> |             |  |           | HERG                         | Juveniles  |
| Gonzalez-Acuna <i>et al.</i> (2007) | <i>Salmonella</i> spp.        | <b>Summer</b> |               | <b>Yes</b> |             |  |           | ROPI                         |            |
| Gargiulo <i>et al.</i> (2014)       | <i>Salmonella</i> Typhimurium | <b>Summer</b> | <b>Winter</b> | <b>Yes</b> |             |  |           | ROPI                         |            |
| Levesque <i>et al.</i> (2000)       | <i>Salmonella</i> spp.        |               |               |            | <b>Same</b> |  | <b>No</b> | RBGU                         |            |

**Table S10.** Studies seeking to demonstrate crossover of bacteria between wild birds and humans and/or livestock, including molecular technique used (comparison method), extent of coverage/comparison group, the number of isolates or strains from wild birds that matched human/livestock isolates/strain types, number of birds tested or number of bird isolates, and wild bird species tested. Bird species are identified according to AOU four-letter codes (see Supplementary Data S2). *BlnI* = restriction enzyme for PFGE, *flaA* = flagellin-encoding A gene, HiMLST = high-throughput multilocus sequence typing, *KpnI* = restriction enzyme for PFGE, MLST = Multilocus sequence typing, MLVA = Multiple loci variable-number tandem repeat analysis, N/A = not available, NCBI BLAST = National Center for Biotechnology Information Basic Local Alignment Search Tool, *NotI* = restriction enzyme for PFGE, PFGE = pulsed-field gel electrophoresis, *porA* = major outer-membrane protein gene, PubMLST = Public databases for molecular typing, RFLP = restriction fragment length polymorphism, rRNA = ribosomal ribonucleic acid, *SfiI* = restriction enzyme for PFGE, *SmaI* = restriction enzyme for PFGE, *SpeI* = restriction enzyme for PFGE, ST = sequence type, STEC = Shiga toxin-producing *E. coli*, SVR = short variable region, VTEC = Verocytotoxin-producing *E. coli*, *XbaI* = restriction enzyme for PFGE

| Study                         | Bacteria                                         | Comparison method                                                                  | Comparison group                                                                                                                                                             | Human/<br>livestock | Tested | Species                            | Notes                               |
|-------------------------------|--------------------------------------------------|------------------------------------------------------------------------------------|------------------------------------------------------------------------------------------------------------------------------------------------------------------------------|---------------------|--------|------------------------------------|-------------------------------------|
| Mohan <i>et al.</i> (2013)    | <i>Campylobacter jejuni</i>                      | MLST; <i>flaA</i> SVR and <i>porA</i> gene sequence typing                         | PubMLST                                                                                                                                                                      | 14                  | 43     | EUST, MALL                         | Sequence types                      |
| Palmgren <i>et al.</i> (2004) | <i>Campylobacter jejuni</i>                      | PFGE ( <i>SmaI</i> and <i>KpnI</i> )                                               | Malmö, Sweden region database of <i>C. jejuni</i> profiles with gull, chicken, and human isolates; 172 profiles from wild bird and human isolates from Kalmar County, Sweden | 2                   | 2      | PEFA                               |                                     |
| Pao <i>et al.</i> (2014)      | <i>Campylobacter jejuni</i>                      | PFGE ( <i>SmaI</i> )                                                               | Small ruminants from farms on which birds were caught                                                                                                                        | 0                   | 19     | BHCO, CHSP, EUST, HOSP, MODO, ROPI |                                     |
| Sanad <i>et al.</i> (2013)    | <i>Campylobacter jejuni</i>                      | PFGE ( <i>SmaI</i> ); Antimicrobial resistance typing; MLST (7 housekeeping genes) | Dairy cattle from farms on which starlings were caught; <i>Campylobacter</i> MLST database for ST                                                                            | 20                  | 57     | EUST                               | Comparing EUST to cattle on feedlot |
| Weis <i>et al.</i> (2014)     | <i>Campylobacter jejuni</i>                      | 16S rRNA and Sanger sequencing                                                     | NCBI BLAST reference sequences                                                                                                                                               | 5                   | 65     | AMCR                               |                                     |
| Lawton <i>et al.</i> (2018)   | <i>Campylobacter jejuni</i> subsp. <i>jejuni</i> | Whole-genome sequencing and MLST                                                   | Chickens; <i>Campylobacter</i> MLST database for ST                                                                                                                          | 3                   | 19     | AMCR, MALL                         |                                     |

|                                   |                               |                                                                                                                                                                        |                                                                                                                                                                                  |     |     |                                    |                                     |
|-----------------------------------|-------------------------------|------------------------------------------------------------------------------------------------------------------------------------------------------------------------|----------------------------------------------------------------------------------------------------------------------------------------------------------------------------------|-----|-----|------------------------------------|-------------------------------------|
| Colles <i>et al.</i> (2009)       | <i>Campylobacter</i> spp.     | MLST and <i>flaA</i> SVR sequence typing                                                                                                                               | PubMLST                                                                                                                                                                          | N/A | 277 | EUST                               | Unclear how many matches there were |
| Colles <i>et al.</i> (2011)       | <i>Campylobacter</i> spp.     | MLST and <i>flaA</i> SVR sequence typing                                                                                                                               | PubMLST                                                                                                                                                                          | 1   | 109 | MALL                               |                                     |
| Gardner <i>et al.</i> (2011)      | <i>Campylobacter</i> spp.     | PFGE ( <i>SmaI</i> and <i>KpnI</i> )                                                                                                                                   | Clinical isolates, PulseNet, farm environmental samples                                                                                                                          | 3   | 14  | SACR                               |                                     |
| Nebola <i>et al.</i> (2007)       | <i>Campylobacter</i> spp.     | PFGE ( <i>SmaI</i> ) and <i>fla</i> -RFLP                                                                                                                              | Farmed and wild pheasants                                                                                                                                                        | 2   | 51  | RNPH                               | Comparing farmed to wild RNPH       |
| Seguino <i>et al.</i> (2018)      | <i>Campylobacter</i> spp.     | HiMLST                                                                                                                                                                 | PubMLST                                                                                                                                                                          | 16  | 80  | RNPH                               |                                     |
| Sippy <i>et al.</i> (2012)        | <i>Campylobacter</i> spp.     | PFGE ( <i>SmaI</i> or <i>KpnI</i> ) and MLST on 7 target gene loci ( <i>aspA</i> , <i>glnA</i> , <i>gltA</i> , <i>glyA</i> , <i>pgm</i> , <i>tkt</i> and <i>uncA</i> ) | PubMLST, sheep abortion isolates, small wild mammals                                                                                                                             | 2   | 9   | HOSP, RBGR, WTSP                   | Comparing to sheep                  |
| Torres-Mejia <i>et al.</i> (2018) | <i>Salmonella</i> Braenderup  | PFGE                                                                                                                                                                   | N/A but mentions it matching human clinical isolate from Costa Rica                                                                                                              | 0   | 34  | ROPI                               |                                     |
| Hernandez <i>et al.</i> (2012)    | <i>Salmonella enterica</i>    | PFGE and MLVA                                                                                                                                                          | PulseNet, archived wild bird outbreak strains                                                                                                                                    | 28  | 72  | NOCA, AMGO, PUF1, PISI, BHCO, CORE | Necropsy study                      |
| Haesendonck <i>et al.</i> (2016)  | <i>Salmonella</i> Enteritidis | PFGE ( <i>XbaI</i> , <i>NotI</i> , <i>SfiI</i> )                                                                                                                       | BioNumerics <i>S. Enteritidis</i> database at the Institute for Agricultural and Fisheries Research including human, poultry, wildlife, and food isolates from Belgium 1999–2010 | 10  | 10  | ROPI                               |                                     |
| Luque <i>et al.</i> (2009)        | <i>Salmonella</i> Indiana     | PFGE ( <i>XbaI</i> )                                                                                                                                                   | Sheep from farm with outbreak                                                                                                                                                    | 6   | 6   | ROPI, turtledove                   |                                     |
| Gorski <i>et al.</i> (2011)       | <i>Salmonella</i> spp.        | PFGE ( <i>XbaI</i> and <i>BlnI</i> )                                                                                                                                   | PulseNet, mammalian wildlife, environmental samples                                                                                                                              | 0   | 7   | AMCR, SPTO, WCSP                   |                                     |

|                                |                                               |                                       |                                                                                    |    |    |                                  |                             |
|--------------------------------|-----------------------------------------------|---------------------------------------|------------------------------------------------------------------------------------|----|----|----------------------------------|-----------------------------|
| Hernandez <i>et al.</i> (2016) | <i>Salmonella</i> spp.                        | PFGE                                  | PulseNet; archived wild bird, domesticated bird, environmental, and human isolates | 15 | 72 | WHIB                             |                             |
| Pao <i>et al.</i> (2014)       | <i>Salmonella</i> spp.                        | PFGE ( <i>Xba</i> I)                  | Small ruminants from farms on which birds were caught                              | 0  | 1  | EUST                             |                             |
| Hughes <i>et al.</i> (2008)    | <i>Salmonella</i> Typhimurium                 | PFGE ( <i>Xba</i> I and <i>Spe</i> I) | N/A                                                                                | 0  | 32 | HOSP, EUST, EUCD, European birds | Necropsy study              |
| Skov <i>et al.</i> (2008)      | <i>Salmonella</i> Typhimurium                 | PFGE ( <i>Xba</i> I and <i>Bl</i> nI) | Cattle, pigs, pets, rodents, and insects from farms on which birds were caught     | 82 | 82 | HOSP, BARS, EUST, European birds | At outbreak livestock farms |
| Morabito <i>et al.</i> (2001)  | Shiga toxin-producing <i>E. coli</i> (STEC)   | PFGE ( <i>Xba</i> I)                  | Human O45 STEC strain                                                              | 0  | 18 | ROPI                             |                             |
| Nielsen <i>et al.</i> (2004)   | Verocytotoxin-producing <i>E. coli</i> (VTEC) | PFGE ( <i>Xba</i> I)                  | Cattle, pigs, and rats from farms on which birds were caught                       | 1  | 3  | EUST                             |                             |



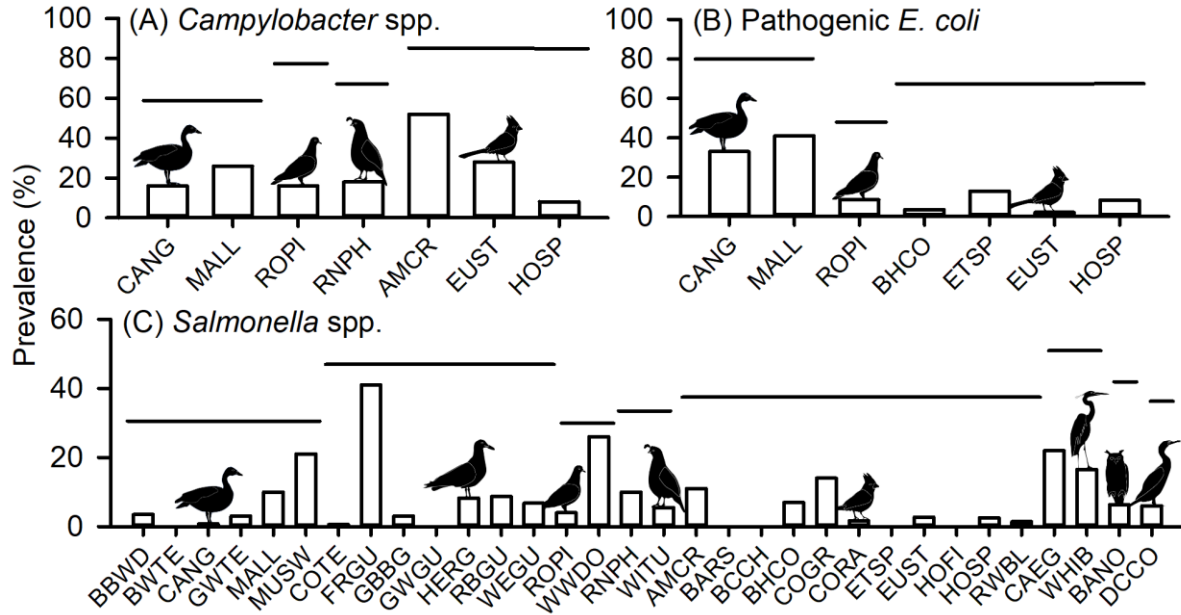

**Fig. S7.** Estimated prevalence of (A) *Campylobacter* spp., (B) pathogenic *E. coli*, and (C) *Salmonella* spp. for all species with enough observations to estimate prevalence with 5% precision. Bars span taxonomic groups with illustrated representations of order. Four-letter codes follow the American Ornithological Society and can be found in Supplementary Data S2.

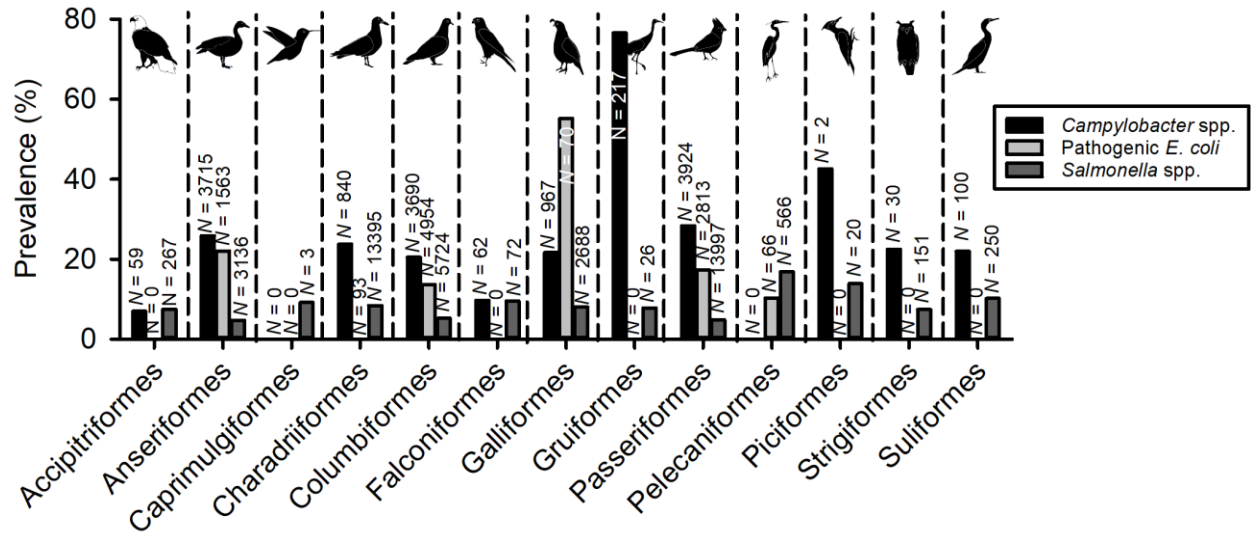

**Fig. S8.** Estimated prevalence of *Campylobacter* spp., pathogenic *E. coli*, and *Salmonella* spp. by taxonomic order. Number above bar shows number of individuals tested for each pathogen by order.

**Table S11.** Prevalence of *Campylobacter* spp. by taxonomic order. Total number of individuals reported positive and tested for *Campylobacter* spp. across the literature and prevalence (total positive across the literature/total number tested; *Campylobacter* prevalence) by taxonomic order. Estimated prevalence by taxonomic order using mixed-effects models and corresponding standard errors and 95% confidence intervals are also presented. N/A, not available.

| Order            | Positive <i>Campylobacter</i> spp. | Tested <i>Campylobacter</i> spp. | <i>Campylobacter</i> spp. prevalence | Estimated prevalence | Estimated standard error | Estimated 95% confidence interval |
|------------------|------------------------------------|----------------------------------|--------------------------------------|----------------------|--------------------------|-----------------------------------|
| Accipitriformes  | 3                                  | 59                               | 5.1%                                 | 7.0%                 | 14.0%                    | (-20.4, 34.4%)                    |
| Anseriformes     | 997                                | 3715                             | 26.8%                                | 25.9%                | 4.7%                     | (16.6%, 35.1%)                    |
| Caprimulgiformes | 0                                  | 0                                | N/A                                  | N/A                  | N/A                      | N/A                               |
| Charadriiformes  | 171                                | 840                              | 20.4%                                | 23.8%                | 5.6%                     | (12.7%, 34.8%)                    |
| Ciconiiformes    | 0                                  | 0                                | N/A                                  | N/A                  | N/A                      | N/A                               |
| Columbiformes    | 1034                               | 3690                             | 28.0%                                | 20.5%                | 7.0%                     | (6.8%, 34.2%)                     |
| Coraciiformes    | 0                                  | 0                                | N/A                                  | N/A                  | N/A                      | N/A                               |
| Cuculiformes     | 0                                  | 0                                | N/A                                  | N/A                  | N/A                      | N/A                               |
| Falconiformes    | 6                                  | 62                               | 9.7%                                 | 9.7%                 | 24.1%                    | (-37.5, 56.9%)                    |
| Galliformes      | 221                                | 967                              | 22.9%                                | 21.7%                | 7.2%                     | (7.6%, 35.7%)                     |
| Gaviiformes      | 0                                  | 0                                | N/A                                  | N/A                  | N/A                      | N/A                               |
| Gruiformes       | 134                                | 217                              | 61.8%                                | 76.6%                | 10.6%                    | (55.9%, 97.3%)                    |
| Passeriformes    | 1270                               | 3924                             | 32.4%                                | 28.4%                | 4.2%                     | (20.2%, 36.6%)                    |
| Pelecaniformes   | 0                                  | 0                                | N/A                                  | N/A                  | N/A                      | N/A                               |
| Piciformes       | 0                                  | 2                                | 0.0%                                 | 42.6%                | 22.9%                    | (-2.3%, 87.5%)                    |
| Podicipediformes | 0                                  | 0                                | N/A                                  | N/A                  | N/A                      | N/A                               |
| Strigiformes     | 1                                  | 30                               | 3.3%                                 | 22.5%                | 9.9%                     | (3.1%, 41.8%)                     |
| Suliformes       | 22                                 | 100                              | 22.0%                                | 22.0%                | 24.1%                    | (-25.3%, 69.3%)                   |

**Table S12.** Tukey HSD pairwise comparisons of *Campylobacter* spp. prevalence in avian taxonomic orders. Values in bold indicate the comparison was significant at  $P = 0.05$ ; SE = standard error.

| Comparison                          | Estimate     | SE          | Z            | P                 |
|-------------------------------------|--------------|-------------|--------------|-------------------|
| <b>Gruiformes – Passeriformes</b>   | <b>-0.48</b> | <b>0.11</b> | <b>-4.51</b> | <b>&lt;0.0001</b> |
| <b>Accipitriformes – Gruiformes</b> | <b>0.70</b>  | <b>0.17</b> | <b>4.03</b>  | <b>&lt;0.0001</b> |
| <b>Galliformes – Gruiformes</b>     | <b>0.55</b>  | <b>0.12</b> | <b>4.51</b>  | <b>&lt;0.0001</b> |
| <b>Columbiformes – Gruiformes</b>   | <b>0.56</b>  | <b>0.12</b> | <b>4.65</b>  | <b>&lt;0.0001</b> |
| <b>Charadriiformes – Gruiformes</b> | <b>0.53</b>  | <b>0.11</b> | <b>4.69</b>  | <b>&lt;0.0001</b> |
| <b>Anseriformes – Gruiformes</b>    | <b>0.51</b>  | <b>0.11</b> | <b>4.73</b>  | <b>&lt;0.0001</b> |
| <b>Gruiformes – Strigiformes</b>    | <b>-0.54</b> | <b>0.14</b> | <b>-3.88</b> | <b>0.0001</b>     |
| <b>Falconiformes – Gruiformes</b>   | <b>0.67</b>  | <b>0.26</b> | <b>2.55</b>  | <b>0.011</b>      |
| <b>Gruiformes – Suliformes</b>      | <b>-0.55</b> | <b>0.26</b> | <b>-2.07</b> | <b>0.038</b>      |
| Accipitriformes – Passeriformes     | 0.21         | 0.14        | 1.51         | 0.13              |
| Accipitriformes – Anseriformes      | 0.19         | 0.14        | 1.31         | 0.19              |
| Columbiformes – Passeriformes       | 0.079        | 0.068       | 1.16         | 0.25              |
| Accipitriformes – Charadriiformes   | 0.17         | 0.15        | 1.14         | 0.26              |
| Accipitriformes – Galliformes       | 0.15         | 0.15        | 0.95         | 0.34              |
| Galliformes – Passeriformes         | 0.067        | 0.071       | 0.95         | 0.34              |
| Accipitriformes – Strigiformes      | 0.15         | 0.17        | 0.93         | 0.35              |
| Accipitriformes – Columbiformes     | 0.13         | 0.15        | 0.89         | 0.38              |
| Charadriiformes – Passeriformes     | 0.046        | 0.058       | 0.81         | 0.42              |
| Falconiformes – Passeriformes       | 0.19         | 0.24        | 0.77         | 0.44              |
| Anseriformes – Columbiformes        | -0.054       | 0.074       | -0.73        | 0.47              |
| Anseriformes – Falconiformes        | -0.16        | 0.25        | -0.66        | 0.51              |
| Passeriformes – Strigiformes        | -0.059       | 0.10        | -0.61        | 0.54              |
| Charadriiformes – Falconiformes     | -0.14        | 0.25        | -0.57        | 0.57              |
| Anseriformes – Galliformes          | -0.042       | 0.075       | -0.56        | 0.58              |
| Accipitriformes – Suliformes        | 0.15         | 0.28        | 0.54         | 0.59              |
| Anseriformes – Passeriformes        | 0.025        | 0.047       | 0.53         | 0.59              |
| Falconiformes – Strigiformes        | 0.13         | 0.26        | 0.49         | 0.62              |
| Falconiformes – Galliformes         | 0.12         | 0.25        | 0.48         | 0.63              |
| Columbiformes – Falconiformes       | -0.11        | 0.25        | -0.43        | 0.67              |
| Charadriiformes – Columbiformes     | -0.033       | 0.080       | -0.41        | 0.68              |
| Falconiformes – Suliformes          | 0.12         | 0.34        | 0.36         | 0.72              |
| Anseriformes – Charadriiformes      | -0.021       | 0.061       | -0.35        | 0.73              |
| Anseriformes – Strigiformes         | -0.034       | 0.10        | -0.34        | 0.74              |
| Passeriformes – Suliformes          | -0.064       | 0.24        | -0.26        | 0.79              |
| Charadriiformes – Galliformes       | -0.021       | 0.083       | -0.25        | 0.80              |
| Columbiformes – Strigiformes        | 0.020        | 0.11        | 0.17         | 0.86              |
| Anseriformes – Suliformes           | -0.039       | 0.25        | -0.16        | 0.88              |
| Columbiformes – Galliformes         | 0.012        | 0.091       | 0.13         | 0.90              |

|                                 |        |      |       |      |
|---------------------------------|--------|------|-------|------|
| Charadriiformes – Strigiformes  | -0.013 | 0.11 | -0.12 | 0.90 |
| Accipitriformes – Falconiformes | 0.026  | 0.28 | 0.09  | 0.92 |
| Charadriiformes – Suliformes    | -0.018 | 0.25 | -0.07 | 0.94 |
| Galliformes – Strigiformes      | 0.008  | 0.12 | 0.07  | 0.94 |
| Columbiformes – Suliformes      | 0.015  | 0.25 | 0.06  | 0.95 |
| Strigiformes – Suliformes       | -0.005 | 0.26 | -0.02 | 0.99 |
| Galliformes – Suliformes        | 0.003  | 0.25 | 0.01  | 0.99 |

**Table S13.** Prevalence of pathogenic (path) *E. coli* by taxonomic order. Total number of individuals reported positive and tested for pathogenic *E. coli* across the literature and prevalence (total positive across the literature/total number tested; Path *E. coli* prevalence) by taxonomic order. Estimated prevalence by taxonomic order using mixed-effects models and corresponding standard errors and 95% confidence intervals are also presented. N/A, not available.

| Order            | Positive path <i>E. coli</i> | Tested path <i>E. coli</i> | Path <i>E. coli</i> prevalence | Estimated prevalence | Estimated standard error | Estimated 95% confidence interval |
|------------------|------------------------------|----------------------------|--------------------------------|----------------------|--------------------------|-----------------------------------|
| Accipitriformes  | 0                            | 0                          | N/A                            | N/A                  | N/A                      | N/A                               |
| Anseriformes     | 553                          | 1563                       | 35.4%                          | 22.1%                | 10.3%                    | (2.0%, 42.2%)                     |
| Caprimulgiformes | 0                            | 0                          | N/A                            | N/A                  | N/A                      | N/A                               |
| Charadriiformes  | 0                            | 93                         | 0.0%                           | -1.7%                | 20.9%                    | (-42.6%, 39.2%)                   |
| Ciconiiformes    | 0                            | 0                          | N/A                            | N/A                  | N/A                      | N/A                               |
| Columbiformes    | 402                          | 4954                       | 8.1%                           | 13.6                 | 3.5                      | (6.7%, 20.5%)                     |
| Coraciiformes    | 0                            | 0                          | N/A                            | N/A                  | N/A                      | N/A                               |
| Cuculiformes     | 0                            | 0                          | N/A                            | N/A                  | N/A                      | N/A                               |
| Falconiformes    | 0                            | 0                          | N/A                            | N/A                  | N/A                      | N/A                               |
| Galliformes      | 40                           | 70                         | 57.1%                          | 55.2%                | 16.6%                    | (22.6%, 87.8%)                    |
| Gaviiformes      | 0                            | 0                          | N/A                            | N/A                  | N/A                      | N/A                               |
| Gruiformes       | 0                            | 0                          | N/A                            | N/A                  | N/A                      | N/A                               |
| Passeriformes    | 179                          | 2439                       | 7.3%                           | 17.3%                | 8.3%                     | (1.1%, 33.6%)                     |
| Pelecaniformes   | 1                            | 66                         | 1.5%                           | 10.3%                | 13.4%                    | (-15.5%, 36.0%)                   |
| Piciformes       | 0                            | 0                          | N/A                            | N/A                  | N/A                      | N/A                               |
| Podicipediformes | 0                            | 0                          | N/A                            | N/A                  | N/A                      | N/A                               |
| Strigiformes     | 0                            | 0                          | N/A                            | N/A                  | N/A                      | N/A                               |
| Suliformes       | 0                            | 0                          | N/A                            | N/A                  | N/A                      | N/A                               |

**Table S14.** Tukey HSD pairwise comparisons of pathogenic *E. coli* prevalence in avian taxonomic orders. Values in bold indicate the comparison was significant at  $P = 0.05$ ; SE = standard error.

| Comparison                           | Estimate     | SE          | Z            | P            |
|--------------------------------------|--------------|-------------|--------------|--------------|
| <b>Charadriiformes – Galliformes</b> | <b>0.57</b>  | <b>0.26</b> | <b>2.23</b>  | <b>0.026</b> |
| <b>Galliformes – Pelecaniformes</b>  | <b>-0.45</b> | <b>0.21</b> | <b>-2.17</b> | <b>0.030</b> |
| <b>Galliformes – Passeriformes</b>   | <b>-0.38</b> | <b>0.18</b> | <b>-2.12</b> | <b>0.034</b> |
| <b>Anseriformes – Galliformes</b>    | <b>0.33</b>  | <b>0.18</b> | <b>1.80</b>  | <b>0.072</b> |
| Columbiformes – Galliformes          | 0.41         | 0.26        | 1.56         | 0.12         |
| Anseriformes – Charadriiformes       | -0.24        | 0.22        | -1.07        | 0.28         |
| Charadriiformes – Passeriformes      | 0.19         | 0.22        | 0.87         | 0.38         |
| Anseriformes – Pelecaniformes        | -0.12        | 0.16        | -0.74        | 0.46         |
| Charadriiformes – Columbiformes      | 0.16         | 0.29        | 0.56         | 0.58         |
| Passeriformes – Pelecaniformes       | -0.071       | 0.14        | -0.50        | 0.61         |
| Charadriiformes – Pelecaniformes     | 0.12         | 0.24        | 0.49         | 0.62         |
| Anseriformes – Passeriformes         | -0.048       | 0.12        | -0.39        | 0.70         |
| Anseriformes – Columbiformes         | -0.077       | 0.23        | -0.34        | 0.73         |
| Columbiformes – Pelecaniformes       | -0.042       | 0.24        | -0.18        | 0.86         |
| Columbiformes – Passeriformes        | 0.029        | 0.22        | 0.13         | 0.89         |

**Table S15.** Prevalence of *Salmonella* spp. by taxonomic order. Total number of individuals reported positive and tested for *Salmonella* spp. across the literature and prevalence (total positive across the literature/total number tested; *Salmonella* prevalence) by taxonomic order. Estimated prevalence by taxonomic order using mixed-effects models and corresponding standard errors and 95% confidence intervals are also presented. N/A, not available.

| Order            | Positive <i>Salmonella</i> spp. | Tested <i>Salmonella</i> spp. | <i>Salmonella</i> spp. prevalence | Estimated prevalence | Estimated standard error | Estimated 95% confidence interval |
|------------------|---------------------------------|-------------------------------|-----------------------------------|----------------------|--------------------------|-----------------------------------|
| Accipitriformes  | 22                              | 267                           | 8.2%                              | 7.5%                 | 3.5%                     | (0.7%, 14.3%)                     |
| Anseriformes     | 71                              | 3136                          | 2.3%                              | 4.7%                 | 1.2%                     | (2.3%, 7.0%)                      |
| Caprimulgiformes | 0                               | 3                             | 0.0%                              | 9.2%                 | 17.9%                    | (-25.9%, 44.2%)                   |
| Charadriiformes  | 1063                            | 13395                         | 7.9%                              | 8.4%                 | 1.5%                     | (5.5%, 11.2%)                     |
| Ciconiiformes    | 0                               | 0                             | N/A                               | N/A                  | N/A                      | N/A                               |
| Columbiformes    | 211                             | 5724                          | 3.7%                              | 5.2%                 | 1.3%                     | (2.7%, 7.7%)                      |
| Coraciiformes    | 0                               | 0                             | N/A                               | N/A                  | N/A                      | N/A                               |
| Cuculiformes     | 0                               | 0                             | N/A                               | N/A                  | N/A                      | N/A                               |
| Falconiformes    | 2                               | 72                            | 2.8%                              | 9.5%                 | 6.2%                     | (-2.7%, 21.8%)                    |

|                  |     |       |       |       |      |                |
|------------------|-----|-------|-------|-------|------|----------------|
| Galliformes      | 52  | 2688  | 1.9%  | 8.0%  | 2.6% | (2.8%, 13.1%)  |
| Gaviiformes      | 0   | 0     | N/A   | N/A   | N/A  | N/A            |
| Gruiformes       | 1   | 26    | 3.8%  | 7.8%  | 6.6% | (-5.0%, 20.7%) |
| Passeriformes    | 377 | 13997 | 2.7%  | 4.8%  | 1.0% | (2.9%, 6.8%)   |
| Pelecaniformes   | 136 | 566   | 24.0% | 16.8% | 3.7% | (9.6%, 24.0%)  |
| Piciformes       | 3   | 20    | 15.0% | 13.9% | 6.4% | (1.2%, 26.5%)  |
| Podicipediformes | 0   | 0     | N/A   | N/A   | N/A  | N/A            |
| Strigiformes     | 11  | 151   | 7.3%  | 7.4%  | 3.1% | (1.5%, 13.4%)  |
| Suliformes       | 15  | 250   | 6.0%  | 10.2% | 3.2% | (4.0%, 16.4%)  |

**Table S16.** Tukey HSD pairwise comparisons of *Salmonella* spp. prevalence in avian taxonomic orders. Values in bold indicate the comparison was significant at  $P = 0.05$ ; SE = standard error.

| Comparisons                             | Estimate      | SE           | Z            | P             |
|-----------------------------------------|---------------|--------------|--------------|---------------|
| <b>Passeriformes – Pelecaniformes</b>   | <b>0.12</b>   | <b>0.037</b> | <b>3.25</b>  | <b>0.0011</b> |
| <b>Anseriformes – Pelecaniformes</b>    | <b>0.12</b>   | <b>0.038</b> | <b>3.23</b>  | <b>0.0012</b> |
| <b>Columbiformes – Pelecaniformes</b>   | <b>0.12</b>   | <b>0.038</b> | <b>3.08</b>  | <b>0.0020</b> |
| <b>Charadriiformes – Passeriformes</b>  | <b>-0.035</b> | <b>0.013</b> | <b>-2.70</b> | <b>0.007</b>  |
| <b>Anseriformes – Charadriiformes</b>   | <b>0.037</b>  | <b>0.015</b> | <b>2.45</b>  | <b>0.014</b>  |
| <b>Charadriiformes – Pelecaniformes</b> | <b>0.084</b>  | <b>0.039</b> | <b>2.19</b>  | <b>0.029</b>  |
| <b>Charadriiformes – Columbiformes</b>  | <b>-0.032</b> | <b>0.016</b> | <b>-2.02</b> | <b>0.043</b>  |
| <b>Pelecaniformes – Strigiformes</b>    | <b>-0.094</b> | <b>0.047</b> | <b>-1.99</b> | <b>0.047</b>  |
| <b>Galliformes – Pelecaniformes</b>     | <b>0.088</b>  | <b>0.045</b> | <b>1.97</b>  | <b>0.049</b>  |
| Accipitriformes – Pelecaniformes        | 0.093         | 0.050        | 1.86         | 0.064         |
| Anseriformes – Suliformes               | 0.056         | 0.032        | 1.72         | 0.085         |
| Passeriformes – Suliformes              | 0.054         | 0.031        | 1.72         | 0.086         |
| Columbiformes – Suliformes              | 0.050         | 0.032        | 1.54         | 0.12          |
| Anseriformes – Piciformes               | 0.092         | 0.064        | 1.43         | 0.15          |
| Passeriformes – Piciformes              | 0.091         | 0.064        | 1.42         | 0.16          |
| Pelecaniformes – Suliformes             | -0.066        | 0.048        | -1.38        | 0.17          |
| Columbiformes – Piciformes              | 0.087         | 0.064        | 1.35         | 0.18          |
| Anseriformes – Galliformes              | 0.033         | 0.028        | 1.19         | 0.24          |
| Galliformes – Passeriformes             | -0.031        | 0.027        | -1.16        | 0.25          |
| Falconiformes – Pelecaniformes          | 0.072         | 0.072        | 1.00         | 0.32          |
| Columbiformes – Galliformes             | 0.028         | 0.028        | 0.98         | 0.33          |
| Anseriformes – Strigiformes             | 0.028         | 0.030        | 0.94         | 0.35          |
| Piciformes – Strigiformes               | -0.064        | 0.071        | -0.91        | 0.36          |
| Accipitriformes – Piciformes            | 0.064         | 0.073        | 0.88         | 0.38          |
| Passeriformes – Strigiformes            | 0.026         | 0.030        | 0.86         | 0.39          |
| Galliformes – Piciformes                | 0.059         | 0.069        | 0.85         | 0.39          |
| Charadriiformes – Piciformes            | 0.055         | 0.065        | 0.85         | 0.40          |
| Accipitriformes – Anseriformes          | -0.028        | 0.036        | -0.78        | 0.44          |

|                                   |         |       |        |      |
|-----------------------------------|---------|-------|--------|------|
| Anseriformes – Falconiformes      | 0.049   | 0.063 | 0.77   | 0.44 |
| Falconiformes – Passeriformes     | -0.047  | 0.063 | -0.75  | 0.45 |
| Accipitriformes – Passeriformes   | -0.026  | 0.036 | -0.74  | 0.46 |
| Columbiformes – Strigiformes      | 0.023   | 0.031 | 0.72   | 0.47 |
| Columbiformes – Falconiformes     | 0.044   | 0.064 | 0.69   | 0.49 |
| Strigiformes – Suliformes         | 0.028   | 0.043 | 0.64   | 0.52 |
| Charadriiformes – Suliformes      | 0.018   | 0.029 | 0.64   | 0.52 |
| Accipitriformes – Columbiformes   | -0.023  | 0.037 | -0.62  | 0.54 |
| Accipitriformes – Suliformes      | 0.027   | 0.047 | 0.59   | 0.56 |
| Galliformes – Suliformes          | 0.022   | 0.041 | 0.55   | 0.58 |
| Piciformes – Suliformes           | -0.037  | 0.071 | -0.52  | 0.60 |
| Anseriformes – Gruiformes         | 0.032   | 0.066 | 0.49   | 0.63 |
| Falconiformes – Piciformes        | 0.043   | 0.090 | 0.48   | 0.63 |
| Gruiformes – Passeriformes        | -0.030  | 0.066 | -0.46  | 0.65 |
| Anseriformes – Columbiformes      | 0.005   | 0.013 | 0.43   | 0.67 |
| Columbiformes – Gruiformes        | 0.026   | 0.066 | 0.40   | 0.69 |
| Pelecaniformes – Piciformes       | -0.029  | 0.074 | -0.40  | 0.69 |
| Columbiformes – Passeriformes     | -0.004  | 0.010 | -0.38  | 0.71 |
| Accipitriformes – Falconiformes   | 0.021   | 0.063 | 0.33   | 0.74 |
| Falconiformes – Strigiformes      | -0.021  | 0.068 | -0.31  | 0.76 |
| Charadriiformes – Strigiformes    | -0.009  | 0.032 | -0.29  | 0.78 |
| Accipitriformes – Charadriiformes | 0.009   | 0.037 | 0.24   | 0.81 |
| Falconiformes – Galliformes       | -0.016  | 0.068 | -0.23  | 0.81 |
| Falconiformes – Gruiformes        | -0.017  | 0.090 | -0.19  | 0.85 |
| Anseriformes – Passeriformes      | 0.002   | 0.009 | 0.19   | 0.85 |
| Charadriiformes – Falconiformes   | 0.012   | 0.064 | 0.18   | 0.85 |
| Charadriiformes – Galliformes     | -0.004  | 0.029 | -0.14  | 0.89 |
| Galliformes – Strigiformes        | -0.005  | 0.040 | -0.13  | 0.90 |
| Accipitriformes – Galliformes     | 0.005   | 0.044 | 0.11   | 0.91 |
| Falconiformes – Suliformes        | 0.007   | 0.070 | 0.094  | 0.93 |
| Charadriiformes – Gruiformes      | -0.005  | 0.067 | -0.080 | 0.94 |
| Accipitriformes – Gruiformes      | 0.004   | 0.074 | 0.050  | 0.96 |
| Galliformes – Gruiformes          | -0.001  | 0.071 | -0.018 | 0.99 |
| Accipitriformes – Strigiformes    | -0.0002 | 0.042 | -0.005 | 1.00 |



**Table S17.** Chi-square test for bias in testing within bird orders for *Campylobacter* spp., *E. coli*, and *Salmonella* spp. for a vulnerable farming population. Comparison uses percentage of species within an order. Exp. = expected, path = pathogenic, gen = generic; *Campylobacter* spp. ( $\chi^2_{13} = 73,612$ ,  $P < 0.0001$ ), pathogenic *E. coli* ( $\chi^2_{13} = 90,389$ ,  $P < 0.0001$ ), generic *E. coli* ( $\chi^2_{13} = 69,170$ ,  $P < 0.0001$ ), and *Salmonella* spp. ( $\chi^2_{13} = 215,468$ ,  $P < 0.0001$ ).

| Order            | Species | % Farm bird species | Tested <i>Campylobacter</i> spp. | Exp. <i>Campylobacter</i> spp. | Tested path <i>E. coli</i> | Exp. path <i>E. coli</i> | Tested gen <i>E. coli</i> | Exp. gen <i>E. coli</i> | Tested <i>Salmonella</i> spp. | Exp. <i>Salmonella</i> spp. |
|------------------|---------|---------------------|----------------------------------|--------------------------------|----------------------------|--------------------------|---------------------------|-------------------------|-------------------------------|-----------------------------|
| Accipitriformes  | 11      | 8.15%               | 59                               | 1109                           | 0                          | 779                      | 111                       | 251                     | 267                           | 3283                        |
| Anseriformes     | 3       | 2.22%               | 3715                             | 302                            | 1563                       | 212                      | 1949                      | 69                      | 3136                          | 895                         |
| Caprimulgiformes | 5       | 3.70%               | 0                                | 504                            | 0                          | 354                      | 0                         | 114                     | 3                             | 1492                        |
| Charadriiformes  | 3       | 2.22%               | 843                              | 302                            | 93                         | 212                      | 730                       | 69                      | 13395                         | 895                         |
| Columbiformes    | 4       | 2.96%               | 3690                             | 403                            | 4954                       | 283                      | 1055                      | 91                      | 5724                          | 1194                        |
| Cuculiformes     | 1       | 0.74%               | 0                                | 101                            | 0                          | 71                       | 0                         | 23                      | 0                             | 298                         |
| Falconiformes    | 3       | 2.22%               | 62                               | 302                            | 0                          | 212                      | 1                         | 69                      | 72                            | 895                         |
| Galliformes      | 3       | 2.22%               | 967                              | 302                            | 70                         | 212                      | 180                       | 69                      | 2688                          | 895                         |
| Gruiformes       | 1       | 0.74%               | 217                              | 101                            | 0                          | 71                       | 30                        | 23                      | 26                            | 298                         |
| Passeriformes    | 91      | 67.41%              | 3924                             | 9171                           | 2439                       | 6443                     | 2872                      | 2080                    | 13997                         | 27162                       |
| Pelecaniformes   | 1       | 0.74%               | 0                                | 101                            | 66                         | 71                       | 72                        | 23                      | 566                           | 298                         |
| Piciformes       | 7       | 5.19%               | 2                                | 705                            | 0                          | 496                      | 0                         | 160                     | 20                            | 2089                        |
| Podicipediformes | 1       | 0.74%               | 0                                | 101                            | 0                          | 71                       | 0                         | 23                      | 0                             | 298                         |
| Strigiformes     | 1       | 0.74%               | 30                               | 101                            | 0                          | 71                       | 2                         | 23                      | 151                           | 298                         |

**Table S18.** Chi-square test for bias in testing within bird orders for *Campylobacter* spp., *E. coli*, and *Salmonella* spp. for a vulnerable farming population. Comparison uses percentage of total sightings. Exp. = expected, path = pathogenic, gen = generic; *Campylobacter* spp. ( $\chi^2_{13} = 172,355$ ,  $P < 0.0001$ ), pathogenic *E. coli* ( $\chi^2_{13} = 58,180$ ,  $P < 0.0001$ ), generic *E. coli* ( $\chi^2_{13} = 210,390$ ,  $P < 0.0001$ ), and *Salmonella* spp. ( $\chi^2_{13} = 318,036$ ,  $P < 0.0001$ ).

| Order            | Species | % Sightings | Tested <i>Campylobacter</i> spp. | Exp. <i>Campylobacter</i> spp. | Tested path <i>E. coli</i> | Exp. path <i>E. coli</i> | Tested gen <i>E. coli</i> | Exp. gen <i>E. coli</i> | Tested <i>Salmonella</i> spp. | Exp. <i>Salmonella</i> spp. |
|------------------|---------|-------------|----------------------------------|--------------------------------|----------------------------|--------------------------|---------------------------|-------------------------|-------------------------------|-----------------------------|
| Accipitriformes  | 11      | 0.78%       | 59                               | 107                            | 0                          | 75                       | 111                       | 24                      | 267                           | 316                         |
| Anseriformes     | 3       | 0.62%       | 3715                             | 84                             | 1563                       | 59                       | 1949                      | 19                      | 3136                          | 249                         |
| Caprimulgiformes | 5       | 1.34%       | 0                                | 183                            | 0                          | 128                      | 0                         | 41                      | 3                             | 541                         |
| Charadriiformes  | 3       | 1.67%       | 843                              | 227                            | 93                         | 159                      | 730                       | 51                      | 13395                         | 672                         |
| Columbiformes    | 4       | 10.79%      | 3690                             | 1468                           | 4954                       | 1032                     | 1055                      | 333                     | 5724                          | 4348                        |
| Cuculiformes     | 1       | 0.01%       | 0                                | 1                              | 0                          | 1                        | 0                         | 0                       | 0                             | 3                           |
| Falconiformes    | 3       | 0.20%       | 62                               | 27                             | 0                          | 19                       | 1                         | 6                       | 72                            | 79                          |
| Galliformes      | 3       | 1.12%       | 967                              | 152                            | 70                         | 107                      | 180                       | 34                      | 2688                          | 450                         |
| Gruiformes       | 1       | 0.29%       | 217                              | 40                             | 0                          | 28                       | 30                        | 9                       | 26                            | 119                         |
| Passeriformes    | 91      | 81.72%      | 3924                             | 11119                          | 2439                       | 7812                     | 2872                      | 2522                    | 13997                         | 32929                       |
| Pelecaniformes   | 1       | 0.05%       | 0                                | 6                              | 66                         | 4                        | 72                        | 1                       | 566                           | 18                          |
| Piciformes       | 7       | 1.40%       | 2                                | 190                            | 0                          | 133                      | 0                         | 43                      | 20                            | 562                         |
| Podicipediformes | 1       | 0.01%       | 0                                | 1                              | 0                          | 1                        | 0                         | 0                       | 0                             | 3                           |
| Strigiformes     | 1       | 0.02%       | 30                               | 2                              | 0                          | 1                        | 2                         | 0                       | 151                           | 6                           |

**Table S19.** Number and percentage of farm bird species and number of combined sightings of species and percentage of total sightings for species with enough data to calculate prevalence for three, two, or one pathogen, those with some data and those with no data. Data on farm bird species from Smith *et al.* (2019).

| Category          | # Species | % Species | # Sightings | % Sightings |
|-------------------|-----------|-----------|-------------|-------------|
| 3 pathogens       | 5         | 3.7%      | 3306        | 25.0%       |
| 2 pathogens       | 3         | 2.2%      | 441         | 3.3%        |
| 1 pathogens       | 7         | 5.2%      | 2031        | 15.3%       |
| Some observations | 65        | 48.5%     | 6413        | 48.5%       |
| No observations   | 54        | 40.3%     | 1043        | 7.9%        |

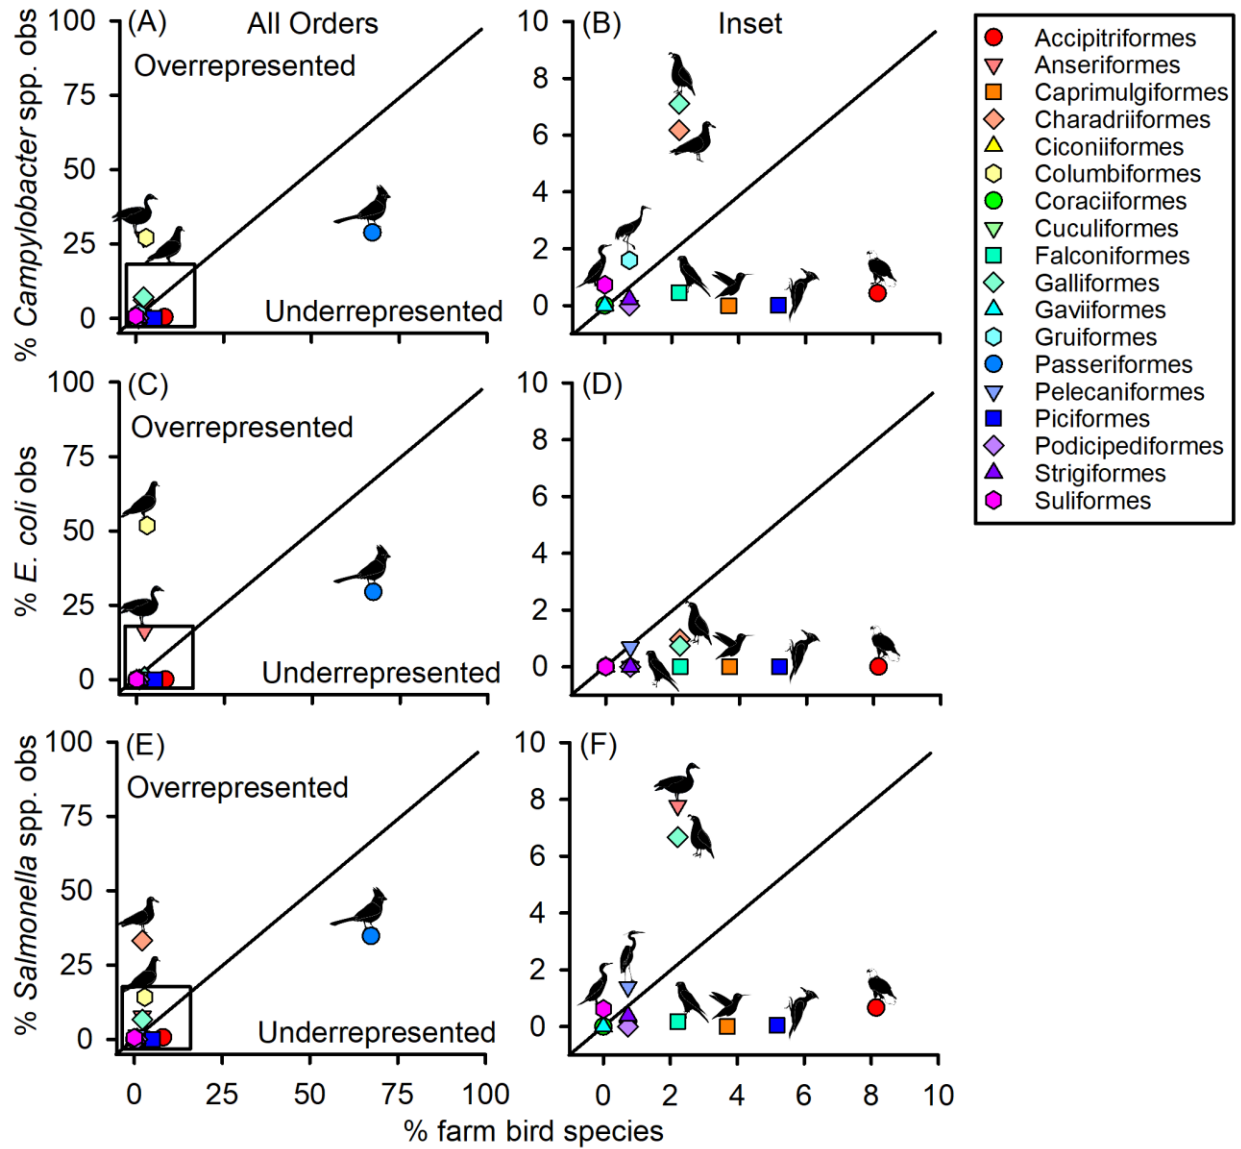

**Fig. S9.** Scatterplot showing the percentage of pathogen observations (obs) belonging to each taxonomic order *versus* % of farm bird species observed by Smith *et al.* (2019). A, C and E show all orders; B, D and F show orders that comprise less than 10% of pathogen observations and less than 10% of farm bird observations (boxed regions in A, C and E, respectively).

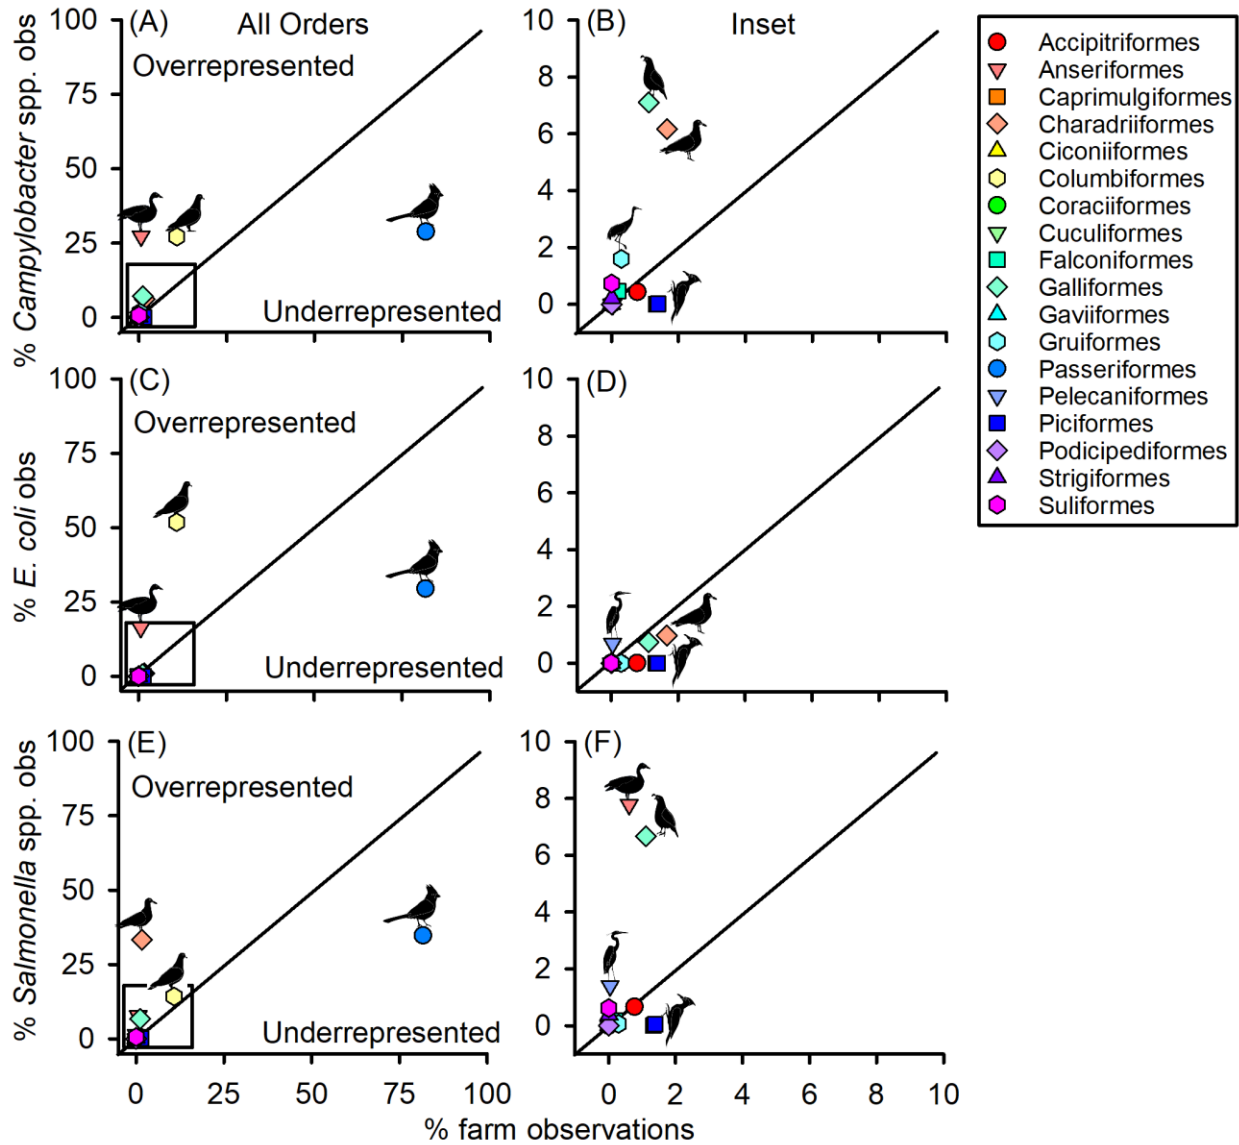

**Fig. S10.** Scatterplot showing the percentage of pathogen observations (obs) belonging to each taxonomic order *versus* % of total observations on farms within each taxa by Smith *et al.* (2019). A, C and E show all orders; B, D and F show orders that comprise less than 10% of pathogen observations and less than 10% of farm bird observations (boxed regions in A, C and E, respectively).

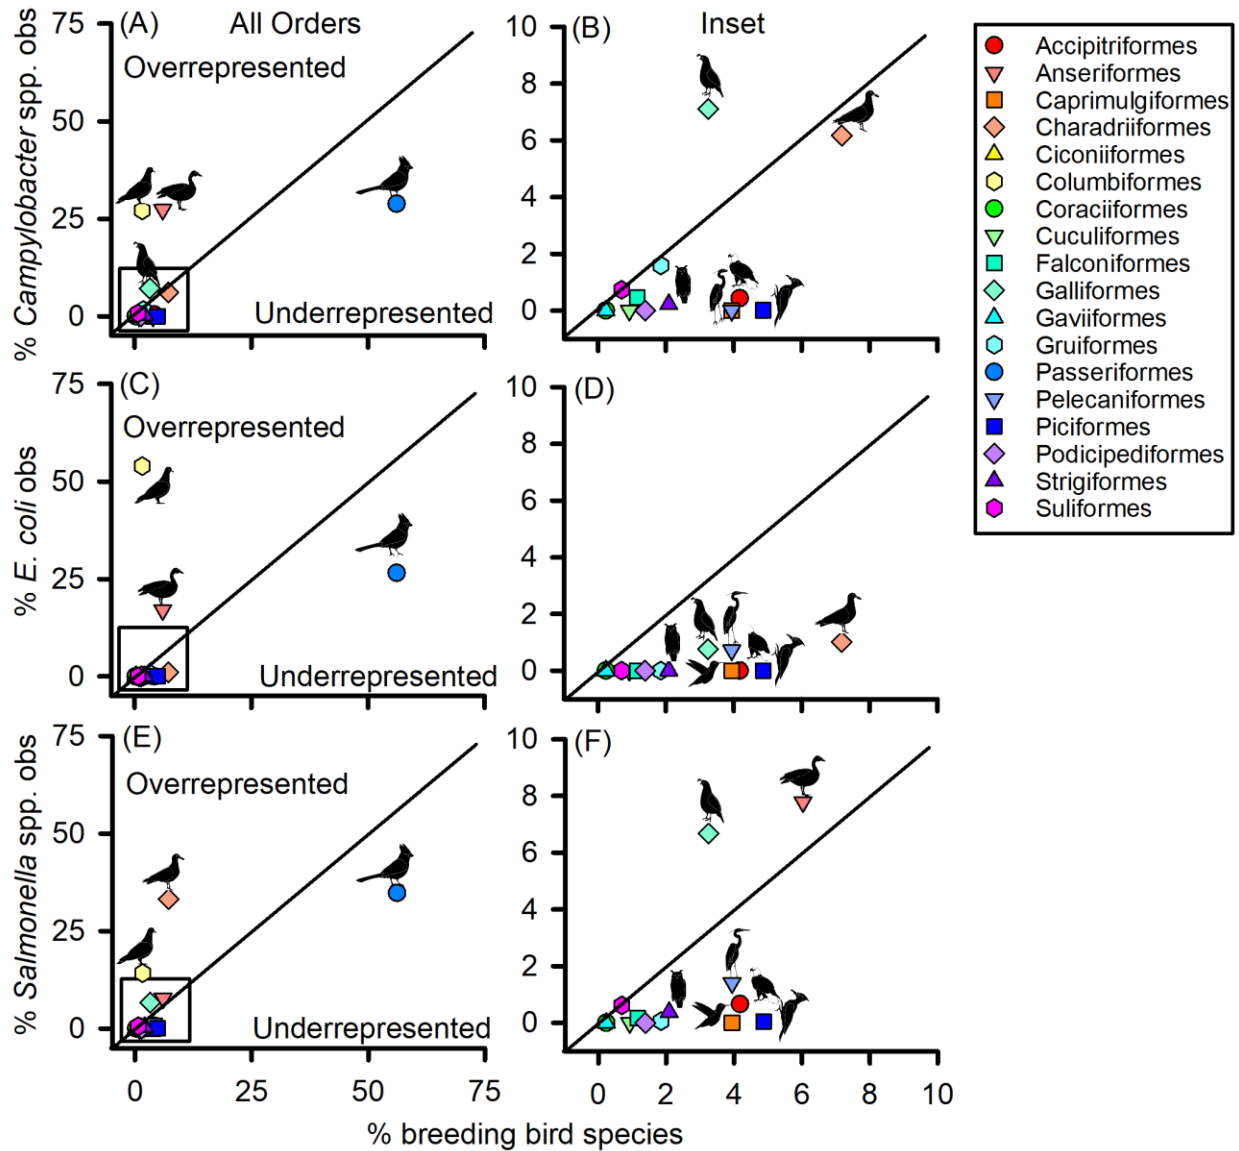

**Fig. S11.** Scatterplot showing the percentage of pathogen observations (obs) belonging to each taxonomic order *versus* % of North American breeding birds each taxon comprises. A, C and E show all orders; B, D and F show orders that comprise less than 10% of pathogen observations and less than 10% of North American breeding bird species (boxed regions in A, C and E, respectively).

**Table S20.** Chi-square test for bias in testing within bird order for *Campylobacter* spp., *E. coli*, and *Salmonella* spp. in North American breeding birds by percentage of species within each order. NA = North American, Exp. = expected, path = pathogenic, gen = generic.

| Order            | Species | % NA species | Tested <i>Campylobacter</i> spp. | Exp. <i>Campylobacter</i> spp. | Tested path <i>E. coli</i> | Exp. path <i>E. coli</i> | Tested gen <i>E. coli</i> | Exp. gen <i>E. coli</i> | Tested <i>Salmonella</i> spp. | Exp. <i>Salmonella</i> spp. |
|------------------|---------|--------------|----------------------------------|--------------------------------|----------------------------|--------------------------|---------------------------|-------------------------|-------------------------------|-----------------------------|
| Accipitriformes  | 18      | 4.18%        | 59                               | 569                            | 0                          | 340                      | 111                       | 129                     | 267                           | 1684                        |
| Anseriformes     | 26      | 6.03%        | 3715                             | 821                            | 1563                       | 577                      | 1949                      | 186                     | 3136                          | 2431                        |
| Caprimulgiformes | 17      | 3.94%        | 0                                | 537                            | 0                          | 377                      | 0                         | 122                     | 3                             | 1589                        |
| Charadriiformes  | 31      | 7.19%        | 840                              | 978                            | 93                         | 687                      | 730                       | 222                     | 13395                         | 2897                        |
| Ciconiiformes    | 1       | 0.23%        | 0                                | 32                             | 0                          | 22                       | 0                         | 7                       | 0                             | 93                          |
| Columbiformes    | 7       | 1.62%        | 3690                             | 221                            | 4954                       | 155                      | 1055                      | 50                      | 5724                          | 654                         |
| Coraciiformes    | 1       | 0.23%        | 0                                | 32                             | 0                          | 22                       | 0                         | 7                       | 0                             | 93                          |
| Cuculiformes     | 4       | 0.93%        | 0                                | 126                            | 0                          | 89                       | 0                         | 29                      | 0                             | 374                         |
| Falconiformes    | 5       | 1.16%        | 62                               | 158                            | 0                          | 111                      | 1                         | 36                      | 72                            | 467                         |
| Galliformes      | 14      | 3.25%        | 967                              | 442                            | 70                         | 311                      | 180                       | 100                     | 2688                          | 1309                        |
| Gaviiformes      | 1       | 0.23%        | 0                                | 32                             | 0                          | 22                       | 0                         | 7                       | 0                             | 93                          |
| Gruiformes       | 8       | 1.86%        | 217                              | 253                            | 0                          | 177                      | 30                        | 57                      | 26                            | 748                         |
| Passeriformes    | 242     | 56.15%       | 3924                             | 7640                           | 2439                       | 5367                     | 2872                      | 1733                    | 13997                         | 22625                       |
| Pelecaniformes   | 17      | 3.94%        | 0                                | 537                            | 66                         | 377                      | 72                        | 122                     | 566                           | 1589                        |
| Piciformes       | 21      | 4.87%        | 2                                | 663                            | 0                          | 466                      | 0                         | 150                     | 20                            | 1963                        |
| Podicipediformes | 6       | 1.39%        | 0                                | 189                            | 0                          | 133                      | 0                         | 43                      | 0                             | 561                         |
| Strigiformes     | 9       | 2.09%        | 30                               | 284                            | 0                          | 200                      | 2                         | 64                      | 151                           | 841                         |
| Suliformes       | 3       | 0.70%        | 100                              | 95                             | 0                          | 67                       | 0                         | 21                      | 250                           | 280                         |

**Table S21.** Chi-square test for bias in testing within bird order for *Campylobacter* spp., *E. coli*, and *Salmonella* spp. in North American breeding birds by relative abundance reported in eBird. Exp. = expected, path = pathogenic, gen = generic.

| Order            | Species | % eBird reports | Tested <i>Campylobacter</i> spp. | Exp. <i>Campylobacter</i> spp. | Tested path <i>E. coli</i> | Exp. path <i>E. coli</i> | Tested gen <i>E. coli</i> | Exp. gen <i>E. coli</i> | Tested <i>Salmonella</i> spp. | Exp. <i>Salmonella</i> spp. |
|------------------|---------|-----------------|----------------------------------|--------------------------------|----------------------------|--------------------------|---------------------------|-------------------------|-------------------------------|-----------------------------|
| Accipitriformes  | 18      | 5.16%           | 59                               | 702                            | 0                          | 493                      | 111                       | 159                     | 267                           | 2080                        |
| Anseriformes     | 26      | 8.76%           | 3715                             | 1192                           | 1563                       | 838                      | 1949                      | 270                     | 3136                          | 3531                        |
| Caprimulgiformes | 17      | 1.50%           | 0                                | 204                            | 0                          | 143                      | 0                         | 46                      | 3                             | 604                         |
| Charadriiformes  | 31      | 5.62%           | 840                              | 764                            | 93                         | 537                      | 730                       | 173                     | 13395                         | 2263                        |
| Ciconiiformes    | 1       | 0.06%           | 0                                | 8                              | 0                          | 6                        | 0                         | 2                       | 0                             | 25                          |
| Columbiformes    | 7       | 4.11%           | 3690                             | 559                            | 4954                       | 393                      | 1055                      | 127                     | 5724                          | 1656                        |
| Coraciiformes    | 1       | 0.58%           | 0                                | 79                             | 0                          | 55                       | 0                         | 18                      | 0                             | 234                         |
| Cuculiformes     | 4       | 0.21%           | 0                                | 28                             | 0                          | 20                       | 0                         | 6                       | 0                             | 83                          |
| Falconiformes    | 5       | 0.77%           | 62                               | 105                            | 0                          | 74                       | 1                         | 24                      | 72                            | 312                         |
| Galliformes      | 14      | 0.63%           | 967                              | 86                             | 70                         | 60                       | 180                       | 19                      | 2688                          | 253                         |
| Gaviiformes      | 1       | 0.24%           | 0                                | 33                             | 0                          | 23                       | 0                         | 7                       | 0                             | 96                          |
| Gruiformes       | 8       | 1.06%           | 217                              | 144                            | 0                          | 101                      | 30                        | 33                      | 26                            | 426                         |
| Passeriformes    | 242     | 59.19%          | 3924                             | 8054                           | 2439                       | 5658                     | 2872                      | 1827                    | 13997                         | 23851                       |
| Pelecaniformes   | 17      | 4.10%           | 0                                | 558                            | 66                         | 392                      | 72                        | 127                     | 566                           | 1652                        |
| Piciformes       | 21      | 5.80%           | 2                                | 789                            | 0                          | 554                      | 0                         | 179                     | 20                            | 2336                        |
| Podicipediformes | 6       | 0.88%           | 0                                | 119                            | 0                          | 84                       | 0                         | 27                      | 0                             | 353                         |
| Strigiformes     | 9       | 0.33%           | 30                               | 45                             | 0                          | 32                       | 2                         | 10                      | 151                           | 135                         |
| Suliformes       | 3       | 1.01%           | 100                              | 137                            | 0                          | 96                       | 0                         | 31                      | 250                           | 405                         |

**Table S22.** Number and percentage of North American breeding bird species and number of combined eBird sightings of species and percentage of total sightings with enough data to calculate prevalence for three, two, or one pathogen, those with some data and those with no data.

| Category          | # Species | % Species | # Sightings | % Sightings |
|-------------------|-----------|-----------|-------------|-------------|
| 3 pathogens       | 5         | 1.2%      | 26,477,111  | 7.6%        |
| 2 pathogens       | 4         | 0.9%      | 10,962,473  | 3.1%        |
| 1 pathogens       | 23        | 5.3%      | 41,837,705  | 12.0%       |
| Some observations | 119       | 27.6%     | 178,879,007 | 51.4%       |
| No observations   | 280       | 65.0%     | 90,065,928  | 25.9%       |

**Table S23.** Comparison of estimated prevalence by substance tested for house sparrow. Table includes prevalence estimated by summing across literature [positive (+)/number tested (*N*) (percentage); positive/tested] and estimated through a mixed-effects model in the *rma.mv* function in the *metafor* package in R (estimated prevalence). The column on the left in each case indicates the substance listed first in the comparison column, and the column on the right indicates the substance listed second in the comparison column. The right side of the table includes Tukey HSD pairwise comparisons.

| Comparison        | Positive/tested   |                   | Estimated prevalence |                | Tukey HSD comparison |       |          |          |
|-------------------|-------------------|-------------------|----------------------|----------------|----------------------|-------|----------|----------|
|                   | +/ <i>N</i> (%)   | +/ <i>N</i> (%)   | % ± SE               | % ± SE         | Estimate             | SE    | <i>Z</i> | <i>P</i> |
| Cloaca – Faeces   | 25/3847<br>(0.9%) | 0/557<br>(0%)     | 0.7% ±<br>0.2%       | 0.2% ±<br>0.2% | -0.005               | 0.002 | -2.1     | 0.035    |
| Cloaca – Necropsy | 25/3847<br>(0.9%) | 57/1046<br>(5.4%) | 0.7% ±<br>0.2%       | 4.0% ±<br>0.6% | 0.033                | 0.006 | 5.33     | < 0.0001 |
| Faeces – Necropsy | 0/557<br>(0%)     | 57/1046<br>(5.4%) | 0.2% ±<br>0.2%       | 4.0% ±<br>0.6% | 0.038                | 0.006 | 6.06     | < 0.0001 |

**Table S24.** Comparison of estimated prevalence by substance tested for European starling. Table includes prevalence estimated by summing across literature [positive (+)/number tested (*N*) (percentage); positive/tested] and estimated through a mixed-effects model in the *rma.mv* function in the *metafor* package in R (estimated prevalence). The column on the left in each case indicates the substance listed first in the comparison column, and the column on the right indicates the substance listed second in the comparison column. The right side of the table includes Tukey HSD pairwise comparisons.

| Comparison        | Positive/tested   |                  | Estimated prevalence |                | Tukey HSD comparison |       |          |          |
|-------------------|-------------------|------------------|----------------------|----------------|----------------------|-------|----------|----------|
|                   | +/ <i>N</i> (%)   | +/ <i>N</i> (%)  | % ± SE               | % ± SE         | Estimate             | SE    | <i>Z</i> | <i>P</i> |
| Cloaca – Faeces   | 63/1013<br>(6.2%) | 6/858<br>(0.7%)  | 3.3% ±<br>2.5%       | 1.0% ±<br>2.3% | -0.023               | 0.034 | -0.66    | 0.51     |
| Cloaca – Necropsy | 63/1013<br>(6.2%) | 35/378<br>(9.3%) | 3.3% ±<br>2.5%       | 4.9% ±<br>2.3% | 0.016                | 0.034 | 0.48     | 0.63     |
| Faeces – Necropsy | 6/858<br>(0.7%)   | 35/378<br>(9.3%) | 1.0% ±<br>2.3%       | 4.9% ±<br>2.3% | 0.039                | 0.033 | 1.19     | 0.23     |



**Table S25.** Comparison of estimated prevalence by substance tested for rock pigeon. Table includes prevalence estimated by summing across literature [positive (+)/number tested (*N*) (percentage); positive/tested] and estimated through a mixed-effects model in the *rma.mv* function in the *metafor* package in R (estimated prevalence). The column on the left in each case indicates the substance listed first in the comparison column, and the column on the right indicates the substance listed second in the comparison column. The right side of the table includes Tukey HSD pairwise comparisons.

| Comparison        | Positive/tested |                 | Estimated prevalence |             | Tukey HSD comparison |       |          |          |
|-------------------|-----------------|-----------------|----------------------|-------------|----------------------|-------|----------|----------|
|                   | +/ <i>N</i> (%) | +/ <i>N</i> (%) | % ± SE               | % ± SE      | Estimate             | SE    | <i>Z</i> | <i>P</i> |
| Blood – Cloaca    | 1/240 (0.4%)    | 96/3904 (2.5%)  | 0.4% ± 4.8%          | 3.7% ± 1.3% | 0.033                | 0.49  | 0.66     | 0.51     |
| Blood – Faeces    | 1/240 (0.4%)    | 20/832 (2.4%)   | 0.4% ± 4.8%          | 1.9% ± 2.4% | 0.014                | 0.054 | 0.27     | 0.79     |
| Blood – Necropsy  | 1/240 (0.4%)    | 16/265 (6.0%)   | 0.4% ± 4.8%          | 6.6% ± 3.6% | 0.062                | 0.055 | 1.13     | 0.26     |
| Cloaca – Faeces   | 96/3904 (2.5%)  | 96/3904 (2.5%)  | 3.7% ± 1.3%          | 1.9% ± 2.4% | -0.018               | 0.028 | -0.67    | 0.50     |
| Cloaca – Necropsy | 96/3904 (2.5%)  | 16/265 (6.0%)   | 3.7% ± 1.3%          | 6.6% ± 3.6% | 0.029                | 0.029 | 0.98     | 0.33     |
| Faeces – Necropsy | 20/832 (2.4%)   | 16/265 (6.0%)   | 1.9% ± 2.4%          | 6.6% ± 3.6% | 0.047                | 0.036 | 1.32     | 0.19     |

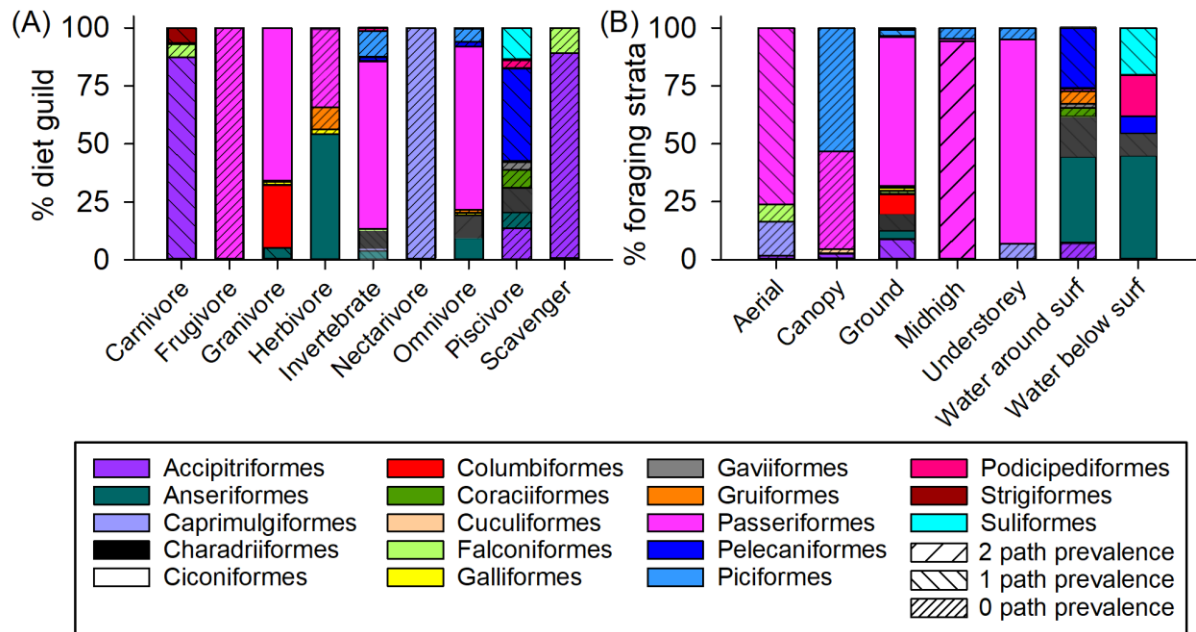

**Fig. S12.** Percentage of total (A) diet guild and (B) foraging strata comprised by each taxonomic order denoted by colour. Pattern indicates if enough data were available to determine prevalence with 5% precision for 0 (smallest grain stripe) to three pathogens (no pattern).

**Table S26.** Prevalence of *Campylobacter* spp. by diet guild in wild birds. Total number of individuals reported positive and tested for *Campylobacter* spp. across the literature and prevalence (total positive across the literature/total number tested) by diet guild. Estimated prevalence by diet guild using mixed-effects models and corresponding standard errors and 95% confidence intervals are also presented.

| Diet guild   | <i>Campylobacter</i> spp. positive | <i>Campylobacter</i> spp. tested | <i>Campylobacter</i> spp. prevalence | Estimated prevalence | Estimated standard error | Estimated 95% confidence interval |
|--------------|------------------------------------|----------------------------------|--------------------------------------|----------------------|--------------------------|-----------------------------------|
| Scavenger    | 0                                  | 3                                | 0.0%                                 | -1.6%                | 21.6%                    | (-43.9%, 40.6%)                   |
| Carnivore    | 10                                 | 148                              | 6.8%                                 | 18.6%                | 9.6%                     | (-0.2%, 37.3%)                    |
| Piscivore    | 25                                 | 315                              | 7.9%                                 | 19.3%                | 11.7%                    | (-3.6%, 42.2%)                    |
| Herbivore    | 313                                | 1519                             | 20.6%                                | 23.4%                | 6.3%                     | (11.0%, 35.8%)                    |
| Invertebrate | 54                                 | 258                              | 20.9%                                | 35.1%                | 7.0%                     | (21.5%, 48.8%)                    |
| Granivore    | 1228                               | 4791                             | 25.6%                                | 22.2%                | 5.4%                     | (11.5%, 32.9%)                    |
| Omnivore     | 2229                               | 6572                             | 33.9%                                | 30.9%                | 4.3%                     | (22.6%, 39.2%)                    |
| Frugivore    | 0                                  | 0                                | N/A                                  | N/A                  | N/A                      | N/A                               |
| Nectarivore  | 0                                  | 0                                | N/A                                  | N/A                  | N/A                      | N/A                               |

**Table S27.** Tukey HSD pairwise comparisons examining *Campylobacter* spp. prevalence by diet guild. SE = standard error.

| Comparison               | Estimate | SE    | Z     | P     |
|--------------------------|----------|-------|-------|-------|
| Granivore – Invertebrate | 0.13     | 0.077 | 1.67  | 0.095 |
| Granivore – Omnivore     | 0.087    | 0.056 | 1.56  | 0.12  |
| Carnivore – Invertebrate | 0.17     | 0.11  | 1.47  | 0.14  |
| Herbivore – Invertebrate | 0.12     | 0.085 | 1.39  | 0.16  |
| Carnivore – Omnivore     | 0.12     | 0.10  | 1.25  | 0.21  |
| Invertebrate – Piscivore | -0.16    | 0.13  | -1.21 | 0.23  |
| Herbivore – Omnivore     | 0.075    | 0.064 | 1.17  | 0.24  |
| Omnivore – Piscivore     | -0.12    | 0.12  | -0.98 | 0.33  |
| Invertebrate – Omnivore  | -0.042   | 0.071 | -0.59 | 0.55  |
| Carnivore – Herbivore    | 0.048    | 0.11  | 0.44  | 0.66  |
| Carnivore – Granivore    | 0.036    | 0.10  | 0.35  | 0.73  |
| Herbivore – Piscivore    | -0.041   | 0.13  | -0.32 | 0.75  |
| Granivore – Piscivore    | -0.029   | 0.12  | -0.24 | 0.81  |
| Granivore – Herbivore    | 0.012    | 0.072 | 0.16  | 0.87  |
| Carnivore – Piscivore    | 0.007    | 0.15  | 0.048 | 0.96  |

**Table S28.** Prevalence of *Campylobacter* spp. by foraging strata in wild birds. Total number of individuals reported positive and tested for *Campylobacter* spp. across the literature and prevalence (total positive across the literature/total number tested) by foraging strata. Estimated prevalence by foraging strata using mixed-effects models and corresponding standard errors and 95% confidence intervals are also presented.

| Foraging strata   | <i>Campylobacter</i> spp. positive | <i>Campylobacter</i> spp. Tested | <i>Campylobacter</i> spp. prevalence | Estimated prevalence | Estimated standard error | Estimated 95% confidence interval |
|-------------------|------------------------------------|----------------------------------|--------------------------------------|----------------------|--------------------------|-----------------------------------|
| Canopy            | 0                                  | 2                                | 0.0%                                 | 42.3%                | 23.7%                    | (-4.2%, 88.6%)                    |
| Midhigh           | 1                                  | 23                               | 4.3%                                 | 29.5%                | 11.1%                    | (7.8%, 51.1%)                     |
| Water below surf  | 37                                 | 338                              | 10.9%                                | 32.9%                | 9.6%                     | (14.1%, 51.6%)                    |
| Aerial            | 33                                 | 245                              | 13.5%                                | 15.8%                | 10.8%                    | (-5.3%, 36.9%)                    |
| Understorey       | 43                                 | 311                              | 13.8%                                | 29.1%                | 8.8%                     | (11.8%, 46.3%)                    |
| Ground            | 2989                               | 10136                            | 29.5%                                | 28.2%                | 4.1%                     | (20.2%, 36.3%)                    |
| Water around surf | 756                                | 2551                             | 29.6%                                | 24.2%                | 5.4%                     | (14.1%, 51.6%)                    |

**Table S29.** Tukey HSD pairwise comparisons examining *Campylobacter* spp. prevalence by foraging strata. SE = standard error.

| Comparison                           | Estimate | SE    | Z      | P    |
|--------------------------------------|----------|-------|--------|------|
| Aerial – Water below surf            | 0.17     | 0.14  | 1.21   | 0.22 |
| Aerial – Ground                      | 0.12     | 0.11  | 1.13   | 0.26 |
| Aerial – Understorey                 | 0.13     | 0.13  | 0.99   | 0.32 |
| Aerial – Midhigh                     | 0.14     | 0.15  | 0.91   | 0.36 |
| Water Around Surf – Water below surf | 0.087    | 0.10  | 0.85   | 0.40 |
| Ground – Water around surf           | -0.041   | 0.054 | -0.75  | 0.45 |
| Aerial – Water around surf           | 0.084    | 0.12  | 0.73   | 0.47 |
| Understorey – Water around surf      | -0.049   | 0.095 | -0.51  | 0.61 |
| Ground – Water below surf            | 0.046    | 0.10  | 0.48   | 0.63 |
| Midhigh – Water around surf          | -0.053   | 0.12  | -0.45  | 0.65 |
| Understorey – Water below surf       | 0.038    | 0.12  | 0.31   | 0.76 |
| Ground – Midhigh                     | 0.012    | 0.11  | 0.11   | 0.91 |
| Ground – Understorey                 | 0.008    | 0.087 | 0.094  | 0.93 |
| Midhigh – Understorey                | -0.004   | 0.13  | -0.030 | 0.98 |

**Table S30.** Prevalence of pathogenic *E. coli* by diet guild in wild birds. Total number of individuals reported positive and tested for pathogenic *E. coli* across the literature and prevalence (total positive across the literature/total number tested) by diet guild. Estimated prevalence by diet guild using mixed-effects models and corresponding standard errors and 95% confidence intervals are also presented.

| Diet         | <i>E. coli</i> positive | <i>E. coli</i> tested | <i>E. coli</i> prevalence | Estimated prevalence | Estimated standard error | Estimated 95% confidence interval |
|--------------|-------------------------|-----------------------|---------------------------|----------------------|--------------------------|-----------------------------------|
| Invertebrate | 6                       | 248                   | 2.4%                      | 9.8%                 | 14.0%                    | (-17.6%, 37.2%)                   |
| Piscivore    | 1                       | 41                    | 2.4%                      | 10.3%                | 23.5%                    | (-35.8%, 56.4%)                   |
| Granivore    | 540                     | 6121                  | 8.8%                      | 13.7%                | 11.1%                    | (-8.1%, 35.4%)                    |
| Omnivore     | 157                     | 1638                  | 9.6%                      | 27.3%                | 9.1%                     | (9.4%, 45.2%)                     |
| Herbivore    | 471                     | 1137                  | 41.4%                     | 27.1%                | 15.8%                    | (-3.9%, 58.0%)                    |
| Carnivore    | 0                       | 0                     | N/A                       | N/A                  | N/A                      | N/A                               |
| Frugivore    | 0                       | 0                     | N/A                       | N/A                  | N/A                      | N/A                               |
| Nectarivore  | 0                       | 0                     | N/A                       | N/A                  | N/A                      | N/A                               |
| Scavenger    | 0                       | 0                     | N/A                       | N/A                  | N/A                      | N/A                               |

**Table S31.** Tukey HSD pairwise comparisons examining pathogenic *E. coli* prevalence by diet guild. SE = standard error.

| Comparison               | Estimate | SE   | Z     | P    |
|--------------------------|----------|------|-------|------|
| Invertebrate – Omnivore  | 0.18     | 0.16 | 1.10  | 0.27 |
| Granivore – Omnivore     | 0.14     | 0.13 | 1.02  | 0.31 |
| Herbivore – Invertebrate | -0.17    | 0.21 | -0.83 | 0.41 |
| Granivore – Herbivore    | 0.13     | 0.19 | 0.72  | 0.47 |
| Herbivore – Piscivore    | -0.17    | 0.28 | -0.60 | 0.55 |
| Granivore – Invertebrate | -0.039   | 0.17 | -0.23 | 0.82 |
| Granivore – Piscivore    | -0.034   | 0.25 | -0.13 | 0.89 |
| Invertebrate – Piscivore | 0.005    | 0.27 | 0.019 | 0.98 |
| Herbivore – Omnivore     | 0.002    | 0.17 | 0.014 | 0.99 |

**Table S32.** Prevalence of pathogenic *E. coli* by foraging strata in wild birds. Total number of individuals reported positive and tested for pathogenic *E. coli* across the literature and prevalence (total positive across the literature/total number tested) by foraging strata. Estimated prevalence by foraging strata using mixed-effects models and corresponding standard errors and 95% confidence intervals are also presented.

| Foraging strata   | <i>E. coli</i> positive | <i>E. coli</i> tested | <i>E. coli</i> prevalence | Estimated prevalence | Estimated standard error | Estimated 95% confidence interval |
|-------------------|-------------------------|-----------------------|---------------------------|----------------------|--------------------------|-----------------------------------|
| Midhigh           | 0                       | 0                     | N/A                       | N/A                  | N/A                      | N/A                               |
| Aerial            | 4                       | 84                    | 4.8%                      | 12.8%                | 23.1%                    | (-32.5%, 58.1%)                   |
| Ground            | 1004                    | 8175                  | 12.3%                     | 22.6%                | 8.4%                     | (6.2%, 39.1%)                     |
| Understorey       | 52                      | 297                   | 17.5%                     | 13.3%                | 23.1%                    | (-32.1%, 58.6%)                   |
| Water around surf | 115                     | 629                   | 18.3%                     | 18.1%                | 9.6%                     | (-0.7%, 36.8%)                    |
| Canopy            | 0                       | 0                     | N/A                       | N/A                  | N/A                      | N/A                               |
| Water below surf  | 0                       | 0                     | N/A                       | N/A                  | N/A                      | N/A                               |

**Table S33.** Tukey HSD pairwise comparisons examining pathogenic *E. coli* prevalence by foraging strata. SE = standard error.

| Comparison                      | Estimate | SE   | Z     | P    |
|---------------------------------|----------|------|-------|------|
| Aerial – Ground                 | 0.10     | 0.24 | 0.41  | 0.68 |
| Ground – Water around surf      | -0.046   | 0.12 | -0.40 | 0.69 |
| Ground – Understorey            | -0.094   | 0.24 | -0.39 | 0.70 |
| Aerial – Water around surf      | 0.052    | 0.24 | 0.21  | 0.83 |
| Understorey – Water around surf | 0.048    | 0.24 | 0.20  | 0.84 |
| Aerial – Understorey            | 0.004    | 0.32 | 0.013 | 0.99 |

**Table S34.** Prevalence of *Salmonella* spp. by diet guild in wild birds. Total number of individuals reported positive and tested for *Salmonella* spp. across the literature and prevalence (total positive across the literature/total number tested) by diet guild. Estimated prevalence by diet guild using mixed-effects models and corresponding standard errors and 95% confidence intervals are also presented

| Diet         | <i>Salmonella</i> spp. positive | <i>Salmonella</i> spp. tested | <i>Salmonella</i> spp. prevalence | Estimated prevalence | Estimated standard error | Estimated 95% confidence interval |
|--------------|---------------------------------|-------------------------------|-----------------------------------|----------------------|--------------------------|-----------------------------------|
| Frugivore    | 0                               | 4                             | 0.0%                              | 17.2%                | 14.7%                    | (-11.5%, 46.0%)                   |
| Nectarivore  | 0                               | 2                             | 0.0%                              | 6.7%                 | 21.8%                    | (-36.0%, 49.3%)                   |
| Herbivore    | 49                              | 2642                          | 1.9%                              | 4.9%                 | 1.3%                     | (2.4%, 7.3%)                      |
| Granivore    | 418                             | 13252                         | 3.2%                              | 5.4%                 | 1.0%                     | (3.4%, 7.4%)                      |
| Invertebrate | 83                              | 2416                          | 3.4%                              | 6.1%                 | 1.2%                     | (3.9%, 8.4%)                      |
| Omnivore     | 1293                            | 20577                         | 6.3%                              | 6.9%                 | 1.0%                     | (4.9%, 9.0%)                      |
| Carnivore    | 34                              | 472                           | 7.2%                              | 7.6%                 | 2.4%                     | (2.3%, 12.4%)                     |
| Scavenger    | 1                               | 11                            | 9.1%                              | 7.3%                 | 8.3%                     | (-9.0%, 23.5%)                    |
| Piscivore    | 86                              | 919                           | 9.4%                              | 9.6%                 | 2.3%                     | (5.0%, 14.1%)                     |

**Table S35.** Tukey HSD pairwise comparisons examining *Salmonella* spp. prevalence by diet guild. Bold values indicate the comparison was significant at  $P = 0.05$ ; SE = standard error.

| Comparison                  | Estimate     | SE           | Z           | P            |
|-----------------------------|--------------|--------------|-------------|--------------|
| <b>Granivore – Omnivore</b> | <b>0.016</b> | <b>0.007</b> | <b>2.33</b> | <b>0.020</b> |
| <b>Herbivore – Omnivore</b> | <b>0.021</b> | <b>0.011</b> | <b>1.99</b> | <b>0.047</b> |
| Herbivore – Piscivore       | 0.047        | 0.024        | 1.93        | 0.054        |
| Granivore – Piscivore       | 0.042        | 0.023        | 1.80        | 0.071        |
| Invertebrate – Piscivore    | 0.034        | 0.024        | 1.43        | 0.15         |
| Omnivore – Piscivore        | 0.026        | 0.023        | 1.16        | 0.25         |
| Herbivore – Invertebrate    | 0.013        | 0.011        | 1.13        | 0.26         |
| Carnivore – Herbivore       | -0.028       | 0.025        | -1.12       | 0.26         |
| Granivore – Invertebrate    | 0.008        | 0.008        | 0.96        | 0.34         |
| Invertebrate – Omnivore     | 0.008        | 0.009        | 0.91        | 0.36         |
| Carnivore – Granivore       | -0.022       | 0.025        | -0.90       | 0.37         |
| Carnivore – Piscivore       | 0.019        | 0.033        | 0.60        | 0.55         |
| Carnivore – Invertebrate    | -0.015       | 0.026        | -0.58       | 0.56         |
| Granivore – Herbivore       | -0.005       | 0.010        | -0.53       | 0.59         |
| Herbivore – Scavenger       | 0.024        | 0.083        | 0.29        | 0.77         |
| Carnivore – Omnivore        | -0.007       | 0.025        | -0.27       | 0.79         |
| Piscivore – Scavenger       | -0.023       | 0.085        | -0.27       | 0.79         |

|                          |        |       |       |      |
|--------------------------|--------|-------|-------|------|
| Granivore – Scavenger    | 0.019  | 0.083 | 0.22  | 0.82 |
| Invertebrate – Scavenger | 0.011  | 0.083 | 0.13  | 0.89 |
| Carnivore – Scavenger    | -0.004 | 0.082 | -0.04 | 0.96 |
| Omnivore – Scavenger     | 0.003  | 0.083 | 0.04  | 0.97 |

**Table S36.** Prevalence of *Salmonella* spp. by foraging strata in wild birds. Total number of individuals reported positive and tested for *Salmonella* spp. across the literature and prevalence (total positive across the literature/total number tested) by foraging strata. Estimated prevalence by foraging strata using mixed-effects models and corresponding standard errors and 95% confidence intervals are also presented

| Foraging strata   | <i>Salmonella</i> positive | <i>Salmonella</i> tested | <i>Salmonella</i> prevalence | Estimated prevalence | Estimated standard error | Estimated 95% confidence interval |
|-------------------|----------------------------|--------------------------|------------------------------|----------------------|--------------------------|-----------------------------------|
| Aerial            | 4                          | 1706                     | 0.2%                         | 5.4%                 | 1.4%                     | (2.5%, 8.2%)                      |
| Understorey       | 2                          | 610                      | 0.3%                         | 5.4%                 | 1.4%                     | (2.7%, 8.1%)                      |
| Midhigh           | 4                          | 443                      | 0.9%                         | 6.3%                 | 1.6%                     | (3.1%, 9.4%)                      |
| Canopy            | 2                          | 119                      | 1.7%                         | 5.1%                 | 3.5%                     | (-1.8%, 12.1%)                    |
| Ground            | 828                        | 22373                    | 3.7%                         | 6.1%                 | 1.0%                     | (4.2%, 8.0%)                      |
| Water below surf  | 17                         | 434                      | 3.9%                         | 8.1%                 | 2.9%                     | (2.4%, 13.9%)                     |
| Water around surf | 1107                       | 14610                    | 7.6%                         | 8.0%                 | 1.2%                     | (5.6%, 10.4%)                     |

**Table S37.** Tukey HSD pairwise comparisons examining *Salmonella* spp. prevalence by foraging strata. SE = standard error.

| Comparison                      | Estimate | SE    | Z-value | P-value |
|---------------------------------|----------|-------|---------|---------|
| Ground – Water around surf      | 0.018    | 0.010 | 1.92    | 0.055   |
| Understorey – Water around surf | 0.025    | 0.014 | 1.85    | 0.064   |
| Aerial – Water around surf      | 0.026    | 0.014 | 1.82    | 0.068   |
| Midhigh – Water around surf     | 0.017    | 0.016 | 1.05    | 0.29    |
| Aerial – Water below surf       | 0.028    | 0.030 | 0.92    | 0.36    |
| Understorey – Water below surf  | 0.027    | 0.030 | 0.91    | 0.37    |
| Canopy – Water around surf      | 0.028    | 0.036 | 0.80    | 0.43    |
| Ground – Water below surf       | 0.020    | 0.028 | 0.72    | 0.47    |
| Canopy – Water below surf       | 0.030    | 0.044 | 0.68    | 0.50    |
| Aerial – Ground                 | 0.008    | 0.012 | 0.66    | 0.51    |
| Ground – Understorey            | -0.007   | 0.011 | -0.64   | 0.52    |
| Midhigh – Understorey           | -0.008   | 0.016 | -0.52   | 0.60    |
| Aerial – Midhigh                | 0.009    | 0.017 | 0.52    | 0.60    |
| Canopy – Midhigh                | 0.011    | 0.037 | 0.31    | 0.76    |



|                                      |        |       |       |      |
|--------------------------------------|--------|-------|-------|------|
| Canopy – Ground                      | 0.010  | 0.035 | 0.29  | 0.77 |
| Ground – Midhigh                     | 0.001  | 0.014 | 0.10  | 0.92 |
| Canopy – Understorey                 | 0.003  | 0.036 | 0.08  | 0.93 |
| Water around surf – Water below surf | 0.002  | 0.030 | 0.06  | 0.95 |
| Aerial – Canopy                      | -0.002 | 0.036 | -0.06 | 0.95 |
| Aerial – Understorey                 | 0.001  | 0.015 | 0.05  | 0.96 |
